# Supplementary material for: Gram staining reveals diverse bacterial associations in coral cell-associated microbial aggregates in the Pacific Ocean
Source: PeerJ. 2025 Aug 19;13:e19867. doi: 10.7717/peerj.19867 (PMC12372787; doi:10.7717/peerj.19867)
Supplement: Supplemental Information 1 — Each data point includes case number, animal, location, date of collection, gross lesion type, anatomical and tissue location of cell-associated microbial aggregate (CAMA), Gram-stain characteristics, shape of bacteria, tissue area measured (mm2), number of CAMA counted, and CAMA/cm2. [file peerj-13-19867-s001.xlsx]

## Sheet: CountsByLesion
Case	Animal	Location	DateCollected	Lesion	Anatomy	Tissuelayer	Gram	Shape	AreaMm2	CAMAcount	CAMAPerCm
15453-4A	Porites evermanni	O‘ahu	2001-04-19	Discoloration	tentacle	gastrodermis	Gram Negative	cocci	215.48	11	5.10495
15453-4A	Porites evermanni	O‘ahu	2001-04-19	Discoloration	tentacle	gastrodermis	Gram Negative	cocci	215.48	11	5.10495
15453-4A	Porites evermanni	O‘ahu	2001-04-19	Discoloration	tentacle	gastrodermis	Gram Negative	cocci	215.48	11	5.10495
15453-4A	Porites evermanni	O‘ahu	2001-04-19	Discoloration	tentacle	gastrodermis	Gram Negative	cocci	215.48	11	5.10495
15453-4A	Porites evermanni	O‘ahu	2001-04-19	Discoloration	tentacle	gastrodermis	Gram Negative	cocci	215.48	11	5.10495
15453-4A	Porites evermanni	O‘ahu	2001-04-19	Discoloration	tentacle	gastrodermis	Gram Negative	cocci	215.48	11	5.10495
15453-4A	Porites evermanni	O‘ahu	2001-04-19	Discoloration	tentacle	gastrodermis	Gram Negative	cocci	215.48	11	5.10495
15453-4A	Porites evermanni	O‘ahu	2001-04-19	Discoloration	tentacle	gastrodermis	Gram Negative	cocci	215.48	11	5.10495
15453-4A	Porites evermanni	O‘ahu	2001-04-19	Discoloration	tentacle	gastrodermis	Gram Negative	cocci	215.48	11	5.10495
15453-4A	Porites evermanni	O‘ahu	2001-04-19	Discoloration	tentacle	gastrodermis	Gram Negative	cocci	215.48	11	5.10495
15453-4A	Porites evermanni	O‘ahu	2001-04-19	Discoloration	tentacle	gastrodermis	Gram Negative	cocci	215.48	11	5.10495
15453-5A	Porites evermanni	O‘ahu	2001-04-19	Tissue loss	tentacle	gastrodermis	Gram Negative	cocci	260.88	4	1.5333
15453-5A	Porites evermanni	O‘ahu	2001-04-19	Tissue loss	tentacle	gastrodermis	Gram Negative	cocci	260.88	4	1.5333
15453-5A	Porites evermanni	O‘ahu	2001-04-19	Tissue loss	tentacle	gastrodermis	Gram Negative	cocci	260.88	4	1.5333
15453-5A	Porites evermanni	O‘ahu	2001-04-19	Tissue loss	tentacle	gastrodermis	Gram Negative	cocci	260.88	4	1.5333
15457-3A	Pocillopora meandrina	Island of Hawai‘i	2001-05-10	Algae overgrowth	tentacle	epidermis	Gram Negative	undetermined	291.79	2	0.685419
15457-3A	Pocillopora meandrina	Island of Hawai‘i	2001-05-10	Algae overgrowth	tentacle	epidermis	Gram Negative	undetermined	291.79	2	0.685419
15457-6A	Pocillopora meandrina	Island of Hawai‘i	2001-05-10	Apparently normal	mesentery	epidermis	Gram Positive	undetermined	24.95	11	44.0836
15457-6A	Pocillopora meandrina	Island of Hawai‘i	2001-05-10	Apparently normal	tentacle	epidermis	Gram Negative	undetermined	24.95	11	44.0836
15457-6A	Pocillopora meandrina	Island of Hawai‘i	2001-05-10	Apparently normal	tentacle	epidermis	Gram Negative	undetermined	24.95	11	44.0836
15457-6A	Pocillopora meandrina	Island of Hawai‘i	2001-05-10	Apparently normal	tentacle	epidermis	Gram Negative	undetermined	24.95	11	44.0836
15457-6A	Pocillopora meandrina	Island of Hawai‘i	2001-05-10	Apparently normal	tentacle	epidermis	Gram Negative	undetermined	24.95	11	44.0836
15457-6A	Pocillopora meandrina	Island of Hawai‘i	2001-05-10	Apparently normal	tentacle	epidermis	Gram Negative	undetermined	24.95	11	44.0836
15457-6A	Pocillopora meandrina	Island of Hawai‘i	2001-05-10	Apparently normal	tentacle	epidermis	Gram Negative	undetermined	24.95	11	44.0836
15457-6A	Pocillopora meandrina	Island of Hawai‘i	2001-05-10	Apparently normal	tentacle	epidermis	Gram Negative	undetermined	24.95	11	44.0836
15457-6A	Pocillopora meandrina	Island of Hawai‘i	2001-05-10	Apparently normal	tentacle	epidermis	Gram Negative	undetermined	24.95	11	44.0836
15457-6A	Pocillopora meandrina	Island of Hawai‘i	2001-05-10	Apparently normal	tentacle	epidermis	Gram Negative	undetermined	24.95	11	44.0836
15457-6A	Pocillopora meandrina	Island of Hawai‘i	2001-05-10	Apparently normal	tentacle	epidermis	Gram Positive	undetermined	24.95	11	44.0836
17550-27A	Porites compressa	French Frigate Shoals	2002-03-27	Algae overgrowth	coenenchyme	gastrodermis	Gram Negative	cocci	252.33	1	0.396313
17550-27B	Porites compressa	French Frigate Shoals	2002-03-27	Algae overgrowth	coenenchyme	gastrodermis	Gram Negative	cocci	224.37	3	1.33708
17550-27B	Porites compressa	French Frigate Shoals	2002-03-27	Algae overgrowth	coenenchyme	gastrodermis	Gram Negative	cocci	224.37	3	1.33708
17550-27B	Porites compressa	French Frigate Shoals	2002-03-27	Algae overgrowth	coenenchyme	gastrodermis	Gram Negative	cocci	224.37	3	1.33708
17550-27C	Porites compressa	French Frigate Shoals	2002-03-27	Algae overgrowth	coenenchyme	gastrodermis	Gram Negative	cocci	168.25	8	4.75484
17550-27C	Porites compressa	French Frigate Shoals	2002-03-27	Algae overgrowth	tentacle	gastrodermis	Gram Negative	cocci	168.25	8	4.75484
17550-27C	Porites compressa	French Frigate Shoals	2002-03-27	Algae overgrowth	tentacle	gastrodermis	Gram Negative	cocci	168.25	8	4.75484
17550-27C	Porites compressa	French Frigate Shoals	2002-03-27	Algae overgrowth	coenenchyme	gastrodermis	Gram Negative	cocci	168.25	8	4.75484
17550-27C	Porites compressa	French Frigate Shoals	2002-03-27	Algae overgrowth	coenenchyme	gastrodermis	Gram Negative	cocci	168.25	8	4.75484
17550-27C	Porites compressa	French Frigate Shoals	2002-03-27	Algae overgrowth	coenenchyme	gastrodermis	Gram Negative	cocci	168.25	8	4.75484
17550-27C	Porites compressa	French Frigate Shoals	2002-03-27	Algae overgrowth	tentacle	gastrodermis	Gram Negative	cocci	168.25	8	4.75484
17550-27C	Porites compressa	French Frigate Shoals	2002-03-27	Algae overgrowth	coenenchyme	gastrodermis	Gram Negative	cocci	168.25	8	4.75484
17550-32B	Pocillopora grandis	French Frigate Shoals	2002-03-25	Bleaching	mesentery	mesoglea	Gram Positive	undetermined	269.01	2	0.743462
17550-32B	Pocillopora grandis	French Frigate Shoals	2002-03-25	Bleaching	tentacle	epidermis	Gram Positive	undetermined	269.01	2	0.743462
17550-34A	Porites evermanni	French Frigate Shoals	2002-03-27	Discoloration	coenenchyme	gastrodermis	Gram Negative	cocci	246.84	51	20.6608
17550-34A	Porites evermanni	French Frigate Shoals	2002-03-27	Discoloration	coenenchyme	gastrodermis	Gram Negative	cocci	246.84	51	20.6608
17550-34A	Porites evermanni	French Frigate Shoals	2002-03-27	Discoloration	tentacle	gastrodermis	Gram Negative	cocci	246.84	51	20.6608
17550-34A	Porites evermanni	French Frigate Shoals	2002-03-27	Discoloration	coenenchyme	gastrodermis	Gram Negative	cocci	246.84	51	20.6608
17550-34A	Porites evermanni	French Frigate Shoals	2002-03-27	Discoloration	tentacle	gastrodermis	Gram Negative	cocci	246.84	51	20.6608
17550-34A	Porites evermanni	French Frigate Shoals	2002-03-27	Discoloration	tentacle	gastrodermis	Gram Negative	cocci	246.84	51	20.6608
17550-34A	Porites evermanni	French Frigate Shoals	2002-03-27	Discoloration	tentacle	gastrodermis	Gram Negative	cocci	246.84	51	20.6608
17550-34A	Porites evermanni	French Frigate Shoals	2002-03-27	Discoloration	tentacle	gastrodermis	Gram Negative	cocci	246.84	51	20.6608
17550-34A	Porites evermanni	French Frigate Shoals	2002-03-27	Discoloration	tentacle	gastrodermis	Gram Negative	cocci	246.84	51	20.6608
17550-34A	Porites evermanni	French Frigate Shoals	2002-03-27	Discoloration	tentacle	gastrodermis	Gram Negative	cocci	246.84	51	20.6608
17550-34A	Porites evermanni	French Frigate Shoals	2002-03-27	Discoloration	tentacle	gastrodermis	Gram Negative	cocci	246.84	51	20.6608
17550-34A	Porites evermanni	French Frigate Shoals	2002-03-27	Discoloration	tentacle	gastrodermis	Gram Negative	cocci	246.84	51	20.6608
17550-34A	Porites evermanni	French Frigate Shoals	2002-03-27	Discoloration	tentacle	gastrodermis	Gram Negative	cocci	246.84	51	20.6608
17550-34A	Porites evermanni	French Frigate Shoals	2002-03-27	Discoloration	tentacle	gastrodermis	Gram Negative	cocci	246.84	51	20.6608
17550-34A	Porites evermanni	French Frigate Shoals	2002-03-27	Discoloration	tentacle	gastrodermis	Gram Negative	cocci	246.84	51	20.6608
17550-34A	Porites evermanni	French Frigate Shoals	2002-03-27	Discoloration	tentacle	gastrodermis	Gram Negative	cocci	246.84	51	20.6608
17550-34A	Porites evermanni	French Frigate Shoals	2002-03-27	Discoloration	tentacle	gastrodermis	Gram Negative	cocci	246.84	51	20.6608
17550-34A	Porites evermanni	French Frigate Shoals	2002-03-27	Discoloration	tentacle	gastrodermis	Gram Negative	cocci	246.84	51	20.6608
17550-34A	Porites evermanni	French Frigate Shoals	2002-03-27	Discoloration	tentacle	gastrodermis	Gram Negative	cocci	246.84	51	20.6608
17550-34A	Porites evermanni	French Frigate Shoals	2002-03-27	Discoloration	tentacle	gastrodermis	Gram Negative	cocci	246.84	51	20.6608
17550-34A	Porites evermanni	French Frigate Shoals	2002-03-27	Discoloration	tentacle	gastrodermis	Gram Negative	cocci	246.84	51	20.6608
17550-34A	Porites evermanni	French Frigate Shoals	2002-03-27	Discoloration	tentacle	gastrodermis	Gram Negative	cocci	246.84	51	20.6608
17550-34A	Porites evermanni	French Frigate Shoals	2002-03-27	Discoloration	tentacle	gastrodermis	Gram Negative	cocci	246.84	51	20.6608
17550-34A	Porites evermanni	French Frigate Shoals	2002-03-27	Discoloration	tentacle	gastrodermis	Gram Negative	cocci	246.84	51	20.6608
17550-34A	Porites evermanni	French Frigate Shoals	2002-03-27	Discoloration	tentacle	gastrodermis	Gram Negative	cocci	246.84	51	20.6608
17550-34A	Porites evermanni	French Frigate Shoals	2002-03-27	Discoloration	tentacle	gastrodermis	Gram Negative	cocci	246.84	51	20.6608
17550-34A	Porites evermanni	French Frigate Shoals	2002-03-27	Discoloration	tentacle	gastrodermis	Gram Negative	cocci	246.84	51	20.6608
17550-34A	Porites evermanni	French Frigate Shoals	2002-03-27	Discoloration	tentacle	gastrodermis	Gram Negative	cocci	246.84	51	20.6608
17550-34A	Porites evermanni	French Frigate Shoals	2002-03-27	Discoloration	coenenchyme	gastrodermis	Gram Negative	cocci	246.84	51	20.6608
17550-34A	Porites evermanni	French Frigate Shoals	2002-03-27	Discoloration	tentacle	gastrodermis	Gram Negative	cocci	246.84	51	20.6608
17550-34A	Porites evermanni	French Frigate Shoals	2002-03-27	Discoloration	tentacle	gastrodermis	Gram Negative	cocci	246.84	51	20.6608
17550-34A	Porites evermanni	French Frigate Shoals	2002-03-27	Discoloration	tentacle	gastrodermis	Gram Negative	cocci	246.84	51	20.6608
17550-34A	Porites evermanni	French Frigate Shoals	2002-03-27	Discoloration	tentacle	gastrodermis	Gram Negative	cocci	246.84	51	20.6608
17550-34A	Porites evermanni	French Frigate Shoals	2002-03-27	Discoloration	tentacle	gastrodermis	Gram Negative	cocci	246.84	51	20.6608
17550-34A	Porites evermanni	French Frigate Shoals	2002-03-27	Discoloration	tentacle	gastrodermis	Gram Negative	cocci	246.84	51	20.6608
17550-34A	Porites evermanni	French Frigate Shoals	2002-03-27	Discoloration	tentacle	gastrodermis	Gram Negative	cocci	246.84	51	20.6608
17550-34A	Porites evermanni	French Frigate Shoals	2002-03-27	Discoloration	tentacle	gastrodermis	Gram Negative	cocci	246.84	51	20.6608
17550-34A	Porites evermanni	French Frigate Shoals	2002-03-27	Discoloration	tentacle	gastrodermis	Gram Negative	cocci	246.84	51	20.6608
17550-34A	Porites evermanni	French Frigate Shoals	2002-03-27	Discoloration	tentacle	gastrodermis	Gram Negative	cocci	246.84	51	20.6608
17550-34A	Porites evermanni	French Frigate Shoals	2002-03-27	Discoloration	coenenchyme	gastrodermis	Gram Negative	cocci	246.84	51	20.6608
17550-34A	Porites evermanni	French Frigate Shoals	2002-03-27	Discoloration	tentacle	gastrodermis	Gram Negative	cocci	246.84	51	20.6608
17550-34A	Porites evermanni	French Frigate Shoals	2002-03-27	Discoloration	tentacle	gastrodermis	Gram Negative	cocci	246.84	51	20.6608
17550-34A	Porites evermanni	French Frigate Shoals	2002-03-27	Discoloration	tentacle	gastrodermis	Gram Negative	cocci	246.84	51	20.6608
17550-34A	Porites evermanni	French Frigate Shoals	2002-03-27	Discoloration	tentacle	gastrodermis	Gram Negative	cocci	246.84	51	20.6608
17550-34A	Porites evermanni	French Frigate Shoals	2002-03-27	Discoloration	tentacle	gastrodermis	Gram Negative	cocci	246.84	51	20.6608
17550-34A	Porites evermanni	French Frigate Shoals	2002-03-27	Discoloration	tentacle	gastrodermis	Gram Negative	cocci	246.84	51	20.6608
17550-34A	Porites evermanni	French Frigate Shoals	2002-03-27	Discoloration	tentacle	gastrodermis	Gram Negative	cocci	246.84	51	20.6608
17550-34A	Porites evermanni	French Frigate Shoals	2002-03-27	Discoloration	tentacle	gastrodermis	Gram Negative	cocci	246.84	51	20.6608
17550-34A	Porites evermanni	French Frigate Shoals	2002-03-27	Discoloration	tentacle	gastrodermis	Gram Negative	cocci	246.84	51	20.6608
17550-34A	Porites evermanni	French Frigate Shoals	2002-03-27	Discoloration	tentacle	gastrodermis	Gram Negative	cocci	246.84	51	20.6608
17550-34A	Porites evermanni	French Frigate Shoals	2002-03-27	Discoloration	tentacle	gastrodermis	Gram Negative	cocci	246.84	51	20.6608
17550-34B	Porites evermanni	French Frigate Shoals	2002-03-27	Discoloration	coenenchyme	gastrodermis	Gram Negative	cocci	428.54	21	4.90039
17550-34B	Porites evermanni	French Frigate Shoals	2002-03-27	Discoloration	coenenchyme	gastrodermis	Gram Negative	cocci	428.54	21	4.90039
17550-34B	Porites evermanni	French Frigate Shoals	2002-03-27	Discoloration	tentacle	gastrodermis	Gram Negative	cocci	428.54	21	4.90039
17550-34B	Porites evermanni	French Frigate Shoals	2002-03-27	Discoloration	tentacle	gastrodermis	Gram Negative	cocci	428.54	21	4.90039
17550-34B	Porites evermanni	French Frigate Shoals	2002-03-27	Discoloration	tentacle	gastrodermis	Gram Negative	cocci	428.54	21	4.90039
17550-34B	Porites evermanni	French Frigate Shoals	2002-03-27	Discoloration	tentacle	gastrodermis	Gram Negative	cocci	428.54	21	4.90039
17550-34B	Porites evermanni	French Frigate Shoals	2002-03-27	Discoloration	tentacle	gastrodermis	Gram Negative	cocci	428.54	21	4.90039
17550-34B	Porites evermanni	French Frigate Shoals	2002-03-27	Discoloration	tentacle	gastrodermis	Gram Negative	cocci	428.54	21	4.90039
17550-34B	Porites evermanni	French Frigate Shoals	2002-03-27	Discoloration	tentacle	gastrodermis	Gram Negative	cocci	428.54	21	4.90039
17550-34B	Porites evermanni	French Frigate Shoals	2002-03-27	Discoloration	tentacle	gastrodermis	Gram Negative	cocci	428.54	21	4.90039
17550-34B	Porites evermanni	French Frigate Shoals	2002-03-27	Discoloration	coenenchyme	gastrodermis	Gram Negative	cocci	428.54	21	4.90039
17550-34B	Porites evermanni	French Frigate Shoals	2002-03-27	Discoloration	coenenchyme	gastrodermis	Gram Negative	cocci	428.54	21	4.90039
17550-34B	Porites evermanni	French Frigate Shoals	2002-03-27	Discoloration	coenenchyme	gastrodermis	Gram Negative	bacilli	428.54	21	4.90039
17550-34B	Porites evermanni	French Frigate Shoals	2002-03-27	Discoloration	tentacle	gastrodermis	Gram Negative	cocci	428.54	21	4.90039
17550-34B	Porites evermanni	French Frigate Shoals	2002-03-27	Discoloration	tentacle	gastrodermis	Gram Negative	cocci	428.54	21	4.90039
17550-34B	Porites evermanni	French Frigate Shoals	2002-03-27	Discoloration	tentacle	gastrodermis	Gram Negative	cocci	428.54	21	4.90039
17550-34B	Porites evermanni	French Frigate Shoals	2002-03-27	Discoloration	tentacle	gastrodermis	Gram Negative	cocci	428.54	21	4.90039
17550-34B	Porites evermanni	French Frigate Shoals	2002-03-27	Discoloration	tentacle	gastrodermis	Gram Negative	cocci	428.54	21	4.90039
17550-34B	Porites evermanni	French Frigate Shoals	2002-03-27	Discoloration	tentacle	gastrodermis	Gram Negative	cocci	428.54	21	4.90039
17550-34B	Porites evermanni	French Frigate Shoals	2002-03-27	Discoloration	tentacle	gastrodermis	Gram Negative	cocci	428.54	21	4.90039
17550-34B	Porites evermanni	French Frigate Shoals	2002-03-27	Discoloration	coenenchyme	gastrodermis	Gram Negative	bacilli	428.54	21	4.90039
17550-34C	Porites evermanni	French Frigate Shoals	2002-03-27	Discoloration	coenenchyme	gastrodermis	Gram Negative	cocci	323.19	22	6.80712
17550-34C	Porites evermanni	French Frigate Shoals	2002-03-27	Discoloration	mesentery	gastrodermis	Gram Negative	cocci	323.19	22	6.80712
17550-34C	Porites evermanni	French Frigate Shoals	2002-03-27	Discoloration	tentacle	gastrodermis	Gram Negative	cocci	323.19	22	6.80712
17550-34C	Porites evermanni	French Frigate Shoals	2002-03-27	Discoloration	tentacle	gastrodermis	Gram Negative	cocci	323.19	22	6.80712
17550-34C	Porites evermanni	French Frigate Shoals	2002-03-27	Discoloration	tentacle	gastrodermis	Gram Negative	cocci	323.19	22	6.80712
17550-34C	Porites evermanni	French Frigate Shoals	2002-03-27	Discoloration	tentacle	gastrodermis	Gram Negative	cocci	323.19	22	6.80712
17550-34C	Porites evermanni	French Frigate Shoals	2002-03-27	Discoloration	tentacle	gastrodermis	Gram Negative	cocci	323.19	22	6.80712
17550-34C	Porites evermanni	French Frigate Shoals	2002-03-27	Discoloration	tentacle	gastrodermis	Gram Negative	cocci	323.19	22	6.80712
17550-34C	Porites evermanni	French Frigate Shoals	2002-03-27	Discoloration	tentacle	gastrodermis	Gram Negative	cocci	323.19	22	6.80712
17550-34C	Porites evermanni	French Frigate Shoals	2002-03-27	Discoloration	mesentery	gastrodermis	Gram Negative	cocci	323.19	22	6.80712
17550-34C	Porites evermanni	French Frigate Shoals	2002-03-27	Discoloration	mesentery	gastrodermis	Gram Negative	bacilli	323.19	22	6.80712
17550-34C	Porites evermanni	French Frigate Shoals	2002-03-27	Discoloration	coenenchyme	gastrodermis	Gram Negative	cocci	323.19	22	6.80712
17550-34C	Porites evermanni	French Frigate Shoals	2002-03-27	Discoloration	mesentery	gastrodermis	Gram Negative	bacilli	323.19	22	6.80712
17550-34C	Porites evermanni	French Frigate Shoals	2002-03-27	Discoloration	mesentery	gastrodermis	Gram Negative	bacilli	323.19	22	6.80712
17550-34C	Porites evermanni	French Frigate Shoals	2002-03-27	Discoloration	mesentery	gastrodermis	Gram Negative	bacilli	323.19	22	6.80712
17550-34C	Porites evermanni	French Frigate Shoals	2002-03-27	Discoloration	mesentery	gastrodermis	Gram Negative	bacilli	323.19	22	6.80712
17550-34C	Porites evermanni	French Frigate Shoals	2002-03-27	Discoloration	mesentery	gastrodermis	Gram Negative	bacilli	323.19	22	6.80712
17550-34C	Porites evermanni	French Frigate Shoals	2002-03-27	Discoloration	mesentery	gastrodermis	Gram Negative	bacilli	323.19	22	6.80712
17550-34C	Porites evermanni	French Frigate Shoals	2002-03-27	Discoloration	mesentery	gastrodermis	Gram Negative	bacilli	323.19	22	6.80712
17550-34C	Porites evermanni	French Frigate Shoals	2002-03-27	Discoloration	mesentery	gastrodermis	Gram Negative	bacilli	323.19	22	6.80712
17550-34C	Porites evermanni	French Frigate Shoals	2002-03-27	Discoloration	mesentery	gastrodermis	Gram Negative	bacilli	323.19	22	6.80712
17550-34C	Porites evermanni	French Frigate Shoals	2002-03-27	Discoloration	tentacle	gastrodermis	Gram Negative	bacilli	323.19	22	6.80712
17550-36A	Porites evermanni	French Frigate Shoals	2002-03-28	Discoloration	coenenchyme	gastrodermis	Gram Negative	cocci	276.57	19	6.86999
17550-36A	Porites evermanni	French Frigate Shoals	2002-03-28	Discoloration	coenenchyme	gastrodermis	Gram Negative	cocci	276.57	19	6.86999
17550-36A	Porites evermanni	French Frigate Shoals	2002-03-28	Discoloration	tentacle	gastrodermis	Gram Negative	cocci	276.57	19	6.86999
17550-36A	Porites evermanni	French Frigate Shoals	2002-03-28	Discoloration	coenenchyme	gastrodermis	Gram Negative	cocci	276.57	19	6.86999
17550-36A	Porites evermanni	French Frigate Shoals	2002-03-28	Discoloration	tentacle	gastrodermis	Gram Negative	cocci	276.57	19	6.86999
17550-36A	Porites evermanni	French Frigate Shoals	2002-03-28	Discoloration	tentacle	gastrodermis	Gram Negative	cocci	276.57	19	6.86999
17550-36A	Porites evermanni	French Frigate Shoals	2002-03-28	Discoloration	tentacle	gastrodermis	Gram Negative	cocci	276.57	19	6.86999
17550-36A	Porites evermanni	French Frigate Shoals	2002-03-28	Discoloration	tentacle	gastrodermis	Gram Negative	cocci	276.57	19	6.86999
17550-36A	Porites evermanni	French Frigate Shoals	2002-03-28	Discoloration	tentacle	gastrodermis	Gram Negative	cocci	276.57	19	6.86999
17550-36A	Porites evermanni	French Frigate Shoals	2002-03-28	Discoloration	tentacle	gastrodermis	Gram Negative	cocci	276.57	19	6.86999
17550-36A	Porites evermanni	French Frigate Shoals	2002-03-28	Discoloration	tentacle	gastrodermis	Gram Negative	cocci	276.57	19	6.86999
17550-36A	Porites evermanni	French Frigate Shoals	2002-03-28	Discoloration	tentacle	gastrodermis	Gram Negative	cocci	276.57	19	6.86999
17550-36A	Porites evermanni	French Frigate Shoals	2002-03-28	Discoloration	tentacle	gastrodermis	Gram Negative	cocci	276.57	19	6.86999
17550-36A	Porites evermanni	French Frigate Shoals	2002-03-28	Discoloration	tentacle	gastrodermis	Gram Negative	cocci	276.57	19	6.86999
17550-36A	Porites evermanni	French Frigate Shoals	2002-03-28	Discoloration	tentacle	gastrodermis	Gram Negative	cocci	276.57	19	6.86999
17550-36A	Porites evermanni	French Frigate Shoals	2002-03-28	Discoloration	tentacle	gastrodermis	Gram Negative	cocci	276.57	19	6.86999
17550-36A	Porites evermanni	French Frigate Shoals	2002-03-28	Discoloration	tentacle	gastrodermis	Gram Negative	cocci	276.57	19	6.86999
17550-36A	Porites evermanni	French Frigate Shoals	2002-03-28	Discoloration	mesentery	gastrodermis	Gram Negative	cocci	276.57	19	6.86999
17550-36A	Porites evermanni	French Frigate Shoals	2002-03-28	Discoloration	mesentery	gastrodermis	Gram Negative	cocci	276.57	19	6.86999
17550-38A	Porites evermanni	French Frigate Shoals	2002-03-28	Tissue loss	coenenchyme	gastrodermis	Gram Negative	cocci	309.65	35	11.303
17550-38A	Porites evermanni	French Frigate Shoals	2002-03-28	Tissue loss	coenenchyme	gastrodermis	Gram Negative	cocci	309.65	35	11.303
17550-38A	Porites evermanni	French Frigate Shoals	2002-03-28	Tissue loss	coenenchyme	gastrodermis	Gram Negative	cocci	309.65	35	11.303
17550-38A	Porites evermanni	French Frigate Shoals	2002-03-28	Tissue loss	tentacle	gastrodermis	Gram Negative	cocci	309.65	35	11.303
17550-38A	Porites evermanni	French Frigate Shoals	2002-03-28	Tissue loss	tentacle	gastrodermis	Gram Negative	cocci	309.65	35	11.303
17550-38A	Porites evermanni	French Frigate Shoals	2002-03-28	Tissue loss	tentacle	gastrodermis	Gram Negative	cocci	309.65	35	11.303
17550-38A	Porites evermanni	French Frigate Shoals	2002-03-28	Tissue loss	tentacle	gastrodermis	Gram Negative	cocci	309.65	35	11.303
17550-38A	Porites evermanni	French Frigate Shoals	2002-03-28	Tissue loss	tentacle	gastrodermis	Gram Negative	cocci	309.65	35	11.303
17550-38A	Porites evermanni	French Frigate Shoals	2002-03-28	Tissue loss	tentacle	gastrodermis	Gram Negative	cocci	309.65	35	11.303
17550-38A	Porites evermanni	French Frigate Shoals	2002-03-28	Tissue loss	tentacle	gastrodermis	Gram Negative	cocci	309.65	35	11.303
17550-38A	Porites evermanni	French Frigate Shoals	2002-03-28	Tissue loss	tentacle	gastrodermis	Gram Negative	cocci	309.65	35	11.303
17550-38A	Porites evermanni	French Frigate Shoals	2002-03-28	Tissue loss	tentacle	gastrodermis	Gram Negative	cocci	309.65	35	11.303
17550-38A	Porites evermanni	French Frigate Shoals	2002-03-28	Tissue loss	tentacle	gastrodermis	Gram Negative	cocci	309.65	35	11.303
17550-38A	Porites evermanni	French Frigate Shoals	2002-03-28	Tissue loss	tentacle	gastrodermis	Gram Negative	cocci	309.65	35	11.303
17550-38A	Porites evermanni	French Frigate Shoals	2002-03-28	Tissue loss	tentacle	gastrodermis	Gram Negative	cocci	309.65	35	11.303
17550-38A	Porites evermanni	French Frigate Shoals	2002-03-28	Tissue loss	tentacle	gastrodermis	Gram Negative	cocci	309.65	35	11.303
17550-38A	Porites evermanni	French Frigate Shoals	2002-03-28	Tissue loss	coenenchyme	gastrodermis	Gram Negative	cocci	309.65	35	11.303
17550-38A	Porites evermanni	French Frigate Shoals	2002-03-28	Tissue loss	coenenchyme	gastrodermis	Gram Negative	cocci	309.65	35	11.303
17550-38A	Porites evermanni	French Frigate Shoals	2002-03-28	Tissue loss	coenenchyme	gastrodermis	Gram Negative	cocci	309.65	35	11.303
17550-38A	Porites evermanni	French Frigate Shoals	2002-03-28	Tissue loss	coenenchyme	gastrodermis	Gram Negative	cocci	309.65	35	11.303
17550-38A	Porites evermanni	French Frigate Shoals	2002-03-28	Tissue loss	tentacle	gastrodermis	Gram Negative	cocci	309.65	35	11.303
17550-38A	Porites evermanni	French Frigate Shoals	2002-03-28	Tissue loss	tentacle	gastrodermis	Gram Negative	cocci	309.65	35	11.303
17550-38A	Porites evermanni	French Frigate Shoals	2002-03-28	Tissue loss	tentacle	gastrodermis	Gram Negative	cocci	309.65	35	11.303
17550-38A	Porites evermanni	French Frigate Shoals	2002-03-28	Tissue loss	tentacle	gastrodermis	Gram Negative	cocci	309.65	35	11.303
17550-38A	Porites evermanni	French Frigate Shoals	2002-03-28	Tissue loss	tentacle	gastrodermis	Gram Negative	cocci	309.65	35	11.303
17550-38A	Porites evermanni	French Frigate Shoals	2002-03-28	Tissue loss	tentacle	gastrodermis	Gram Negative	cocci	309.65	35	11.303
17550-38A	Porites evermanni	French Frigate Shoals	2002-03-28	Tissue loss	tentacle	gastrodermis	Gram Negative	cocci	309.65	35	11.303
17550-38A	Porites evermanni	French Frigate Shoals	2002-03-28	Tissue loss	tentacle	gastrodermis	Gram Negative	cocci	309.65	35	11.303
17550-38A	Porites evermanni	French Frigate Shoals	2002-03-28	Tissue loss	tentacle	gastrodermis	Gram Negative	cocci	309.65	35	11.303
17550-38A	Porites evermanni	French Frigate Shoals	2002-03-28	Tissue loss	tentacle	gastrodermis	Gram Negative	cocci	309.65	35	11.303
17550-38A	Porites evermanni	French Frigate Shoals	2002-03-28	Tissue loss	tentacle	gastrodermis	Gram Negative	cocci	309.65	35	11.303
17550-38A	Porites evermanni	French Frigate Shoals	2002-03-28	Tissue loss	tentacle	gastrodermis	Gram Negative	cocci	309.65	35	11.303
17550-38A	Porites evermanni	French Frigate Shoals	2002-03-28	Tissue loss	tentacle	gastrodermis	Gram Negative	cocci	309.65	35	11.303
17550-38A	Porites evermanni	French Frigate Shoals	2002-03-28	Tissue loss	mesentery	gastrodermis	Gram Negative	cocci	309.65	35	11.303
17550-38A	Porites evermanni	French Frigate Shoals	2002-03-28	Tissue loss	tentacle	gastrodermis	Gram Negative	cocci	309.65	35	11.303
17800-104A	Porites lobata	O‘ahu	2004-05-28	Bleaching	coenenchyme	gastrodermis	Gram Negative	cocci	218.69	4	1.82904
17800-104A	Porites lobata	O‘ahu	2004-05-28	Bleaching	coenenchyme	gastrodermis	Gram Negative	cocci	218.69	4	1.82904
17800-104A	Porites lobata	O‘ahu	2004-05-28	Bleaching	coenenchyme	gastrodermis	Gram Negative	cocci	218.69	4	1.82904
17800-104A	Porites lobata	O‘ahu	2004-05-28	Bleaching	coenenchyme	gastrodermis	Gram Negative	cocci	218.69	4	1.82904
17800-123A	Porites lobata	O‘ahu	2004-06-02	Discoloration	tentacle	gastrodermis	Gram Negative	cocci	280.58	11	3.92051
17800-123A	Porites lobata	O‘ahu	2004-06-02	Discoloration	coenenchyme	gastrodermis	Gram Negative	cocci	280.58	11	3.92051
17800-123A	Porites lobata	O‘ahu	2004-06-02	Discoloration	tentacle	gastrodermis	Gram Negative	cocci	280.58	11	3.92051
17800-123A	Porites lobata	O‘ahu	2004-06-02	Discoloration	coenenchyme	gastrodermis	Gram Negative	cocci	280.58	11	3.92051
17800-123A	Porites lobata	O‘ahu	2004-06-02	Discoloration	tentacle	gastrodermis	Gram Negative	cocci	280.58	11	3.92051
17800-123A	Porites lobata	O‘ahu	2004-06-02	Discoloration	tentacle	gastrodermis	Gram Negative	cocci	280.58	11	3.92051
17800-123A	Porites lobata	O‘ahu	2004-06-02	Discoloration	tentacle	gastrodermis	Gram Negative	cocci	280.58	11	3.92051
17800-123A	Porites lobata	O‘ahu	2004-06-02	Discoloration	coenenchyme	gastrodermis	Gram Negative	cocci	280.58	11	3.92051
17800-123A	Porites lobata	O‘ahu	2004-06-02	Discoloration	coenenchyme	gastrodermis	Gram Negative	cocci	280.58	11	3.92051
17800-123A	Porites lobata	O‘ahu	2004-06-02	Discoloration	tentacle	gastrodermis	Gram Negative	cocci	280.58	11	3.92051
17800-123A	Porites lobata	O‘ahu	2004-06-02	Discoloration	tentacle	gastrodermis	Gram Negative	cocci	280.58	11	3.92051
17800-127A	Porites lobata	O‘ahu	2004-06-02	Discoloration	coenenchyme	gastrodermis	Gram Negative	cocci	158.48	4	2.52402
17800-127A	Porites lobata	O‘ahu	2004-06-02	Discoloration	coenenchyme	gastrodermis	Gram Negative	cocci	158.48	4	2.52402
17800-127A	Porites lobata	O‘ahu	2004-06-02	Discoloration	coenenchyme	gastrodermis	Gram Negative	cocci	158.48	4	2.52402
17800-127A	Porites lobata	O‘ahu	2004-06-02	Discoloration	coenenchyme	gastrodermis	Gram Negative	cocci	158.48	4	2.52402
17800-43A	Porites compressa	O‘ahu	2004-05-10	Bleaching	tentacle	gastrodermis	Gram Negative	cocci	185.34	20	10.7912
17800-43A	Porites compressa	O‘ahu	2004-05-10	Bleaching	tentacle	gastrodermis	Gram Negative	cocci	185.34	20	10.7912
17800-43A	Porites compressa	O‘ahu	2004-05-10	Bleaching	tentacle	gastrodermis	Gram Negative	cocci	185.34	20	10.7912
17800-43A	Porites compressa	O‘ahu	2004-05-10	Bleaching	tentacle	gastrodermis	Gram Negative	cocci	185.34	20	10.7912
17800-43A	Porites compressa	O‘ahu	2004-05-10	Bleaching	tentacle	gastrodermis	Gram Negative	cocci	185.34	20	10.7912
17800-43A	Porites compressa	O‘ahu	2004-05-10	Bleaching	tentacle	gastrodermis	Gram Negative	cocci	185.34	20	10.7912
17800-43A	Porites compressa	O‘ahu	2004-05-10	Bleaching	tentacle	gastrodermis	Gram Negative	cocci	185.34	20	10.7912
17800-43A	Porites compressa	O‘ahu	2004-05-10	Bleaching	tentacle	gastrodermis	Gram Negative	cocci	185.34	20	10.7912
17800-43A	Porites compressa	O‘ahu	2004-05-10	Bleaching	tentacle	gastrodermis	Gram Negative	cocci	185.34	20	10.7912
17800-43A	Porites compressa	O‘ahu	2004-05-10	Bleaching	tentacle	gastrodermis	Gram Negative	cocci	185.34	20	10.7912
17800-43A	Porites compressa	O‘ahu	2004-05-10	Bleaching	tentacle	gastrodermis	Gram Negative	cocci	185.34	20	10.7912
17800-43A	Porites compressa	O‘ahu	2004-05-10	Bleaching	tentacle	gastrodermis	Gram Negative	cocci	185.34	20	10.7912
17800-43A	Porites compressa	O‘ahu	2004-05-10	Bleaching	tentacle	gastrodermis	Gram Negative	cocci	185.34	20	10.7912
17800-43A	Porites compressa	O‘ahu	2004-05-10	Bleaching	tentacle	gastrodermis	Gram Negative	cocci	185.34	20	10.7912
17800-43A	Porites compressa	O‘ahu	2004-05-10	Bleaching	tentacle	gastrodermis	Gram Negative	cocci	185.34	20	10.7912
17800-43A	Porites compressa	O‘ahu	2004-05-10	Bleaching	tentacle	gastrodermis	Gram Negative	cocci	185.34	20	10.7912
17800-43A	Porites compressa	O‘ahu	2004-05-10	Bleaching	tentacle	gastrodermis	Gram Negative	cocci	185.34	20	10.7912
17800-43A	Porites compressa	O‘ahu	2004-05-10	Bleaching	tentacle	gastrodermis	Gram Negative	cocci	185.34	20	10.7912
17800-43A	Porites compressa	O‘ahu	2004-05-10	Bleaching	tentacle	gastrodermis	Gram Negative	cocci	185.34	20	10.7912
17800-43A	Porites compressa	O‘ahu	2004-05-10	Bleaching	tentacle	gastrodermis	Gram Negative	cocci	185.34	20	10.7912
17800-45B	Porites compressa	O‘ahu	2004-05-10	Discoloration	tentacle	gastrodermis	Gram Negative	cocci	106.5	8	7.51139
17800-45B	Porites compressa	O‘ahu	2004-05-10	Discoloration	tentacle	gastrodermis	Gram Negative	cocci	106.5	8	7.51139
17800-45B	Porites compressa	O‘ahu	2004-05-10	Discoloration	coenenchyme	gastrodermis	Gram Negative	cocci	106.5	8	7.51139
17800-45B	Porites compressa	O‘ahu	2004-05-10	Discoloration	tentacle	gastrodermis	Gram Negative	cocci	106.5	8	7.51139
17800-45B	Porites compressa	O‘ahu	2004-05-10	Discoloration	tentacle	gastrodermis	Gram Negative	cocci	106.5	8	7.51139
17800-45B	Porites compressa	O‘ahu	2004-05-10	Discoloration	tentacle	gastrodermis	Gram Negative	cocci	106.5	8	7.51139
17800-45B	Porites compressa	O‘ahu	2004-05-10	Discoloration	tentacle	gastrodermis	Gram Negative	cocci	106.5	8	7.51139
17800-45B	Porites compressa	O‘ahu	2004-05-10	Discoloration	coenenchyme	gastrodermis	Gram Negative	cocci	106.5	8	7.51139
17800-88A	Porites lobata	O‘ahu	2004-05-29	Tissue loss	tentacle	gastrodermis	Gram Negative	cocci	163.66	3	1.83311
17800-88A	Porites lobata	O‘ahu	2004-05-29	Tissue loss	tentacle	gastrodermis	Gram Negative	cocci	163.66	3	1.83311
17800-88A	Porites lobata	O‘ahu	2004-05-29	Tissue loss	tentacle	gastrodermis	Gram Negative	cocci	163.66	3	1.83311
17800-94A	Porites lobata	O‘ahu	2004-05-29	Bleaching	tentacle	gastrodermis	Gram Negative	cocci	228.45	2	0.875473
17800-94A	Porites lobata	O‘ahu	2004-05-29	Bleaching	tentacle	gastrodermis	Gram Negative	cocci	228.45	2	0.875473
17800-96A	Porites lobata	O‘ahu	2004-05-29	Tissue loss	tentacle	gastrodermis	Gram Negative	bacilli	312.97	7	2.23665
17800-96A	Porites lobata	O‘ahu	2004-05-29	Tissue loss	tentacle	gastrodermis	Gram Negative	cocci	312.97	7	2.23665
17800-96A	Porites lobata	O‘ahu	2004-05-29	Tissue loss	tentacle	gastrodermis	Gram Negative	bacilli	312.97	7	2.23665
17800-96A	Porites lobata	O‘ahu	2004-05-29	Tissue loss	coenenchyme	gastrodermis	Gram Negative	cocci	312.97	7	2.23665
17800-96A	Porites lobata	O‘ahu	2004-05-29	Tissue loss	coenenchyme	gastrodermis	Gram Negative	cocci	312.97	7	2.23665
17800-96A	Porites lobata	O‘ahu	2004-05-29	Tissue loss	coenenchyme	gastrodermis	Gram Negative	cocci	312.97	7	2.23665
17800-96A	Porites lobata	O‘ahu	2004-05-29	Tissue loss	coenenchyme	gastrodermis	Gram Negative	cocci	312.97	7	2.23665
17830-12A	Porites compressa	O‘ahu	2004-04-15	Discoloration	coenenchyme	gastrodermis	Gram Negative	cocci	277.47	10	3.60398
17830-12A	Porites compressa	O‘ahu	2004-04-15	Discoloration	coenenchyme	gastrodermis	Gram Negative	cocci	277.47	10	3.60398
17830-12A	Porites compressa	O‘ahu	2004-04-15	Discoloration	coenenchyme	gastrodermis	Gram Negative	cocci	277.47	10	3.60398
17830-12A	Porites compressa	O‘ahu	2004-04-15	Discoloration	coenenchyme	gastrodermis	Gram Negative	cocci	277.47	10	3.60398
17830-12A	Porites compressa	O‘ahu	2004-04-15	Discoloration	coenenchyme	gastrodermis	Gram Negative	cocci	277.47	10	3.60398
17830-12A	Porites compressa	O‘ahu	2004-04-15	Discoloration	coenenchyme	gastrodermis	Gram Positive	bacilli	277.47	10	3.60398
17830-12A	Porites compressa	O‘ahu	2004-04-15	Discoloration	coenenchyme	gastrodermis	Gram Negative	cocci	277.47	10	3.60398
17830-12A	Porites compressa	O‘ahu	2004-04-15	Discoloration	coenenchyme	gastrodermis	Gram Negative	cocci	277.47	10	3.60398
17830-12A	Porites compressa	O‘ahu	2004-04-15	Discoloration	coenenchyme	gastrodermis	Gram Negative	cocci	277.47	10	3.60398
17830-12A	Porites compressa	O‘ahu	2004-04-15	Discoloration	coenenchyme	gastrodermis	Gram Negative	cocci	277.47	10	3.60398
17830-13A	Porites compressa	O‘ahu	2004-04-15	Growth anomaly	tentacle	gastrodermis	Gram Negative	cocci	212.88	21	9.8645
17830-13A	Porites compressa	O‘ahu	2004-04-15	Growth anomaly	tentacle	gastrodermis	Gram Negative	cocci	212.88	21	9.8645
17830-13A	Porites compressa	O‘ahu	2004-04-15	Growth anomaly	tentacle	gastrodermis	Gram Negative	cocci	212.88	21	9.8645
17830-13A	Porites compressa	O‘ahu	2004-04-15	Growth anomaly	tentacle	gastrodermis	Gram Negative	cocci	212.88	21	9.8645
17830-13A	Porites compressa	O‘ahu	2004-04-15	Growth anomaly	tentacle	gastrodermis	Gram Negative	cocci	212.88	21	9.8645
17830-13A	Porites compressa	O‘ahu	2004-04-15	Growth anomaly	tentacle	gastrodermis	Gram Negative	cocci	212.88	21	9.8645
17830-13A	Porites compressa	O‘ahu	2004-04-15	Growth anomaly	coenenchyme	gastrodermis	Gram Negative	cocci	212.88	21	9.8645
17830-13A	Porites compressa	O‘ahu	2004-04-15	Growth anomaly	tentacle	gastrodermis	Gram Negative	cocci	212.88	21	9.8645
17830-13A	Porites compressa	O‘ahu	2004-04-15	Growth anomaly	tentacle	gastrodermis	Gram Negative	cocci	212.88	21	9.8645
17830-13A	Porites compressa	O‘ahu	2004-04-15	Growth anomaly	tentacle	gastrodermis	Gram Negative	cocci	212.88	21	9.8645
17830-13A	Porites compressa	O‘ahu	2004-04-15	Growth anomaly	tentacle	gastrodermis	Gram Negative	cocci	212.88	21	9.8645
17830-13A	Porites compressa	O‘ahu	2004-04-15	Growth anomaly	tentacle	gastrodermis	Gram Negative	cocci	212.88	21	9.8645
17830-13A	Porites compressa	O‘ahu	2004-04-15	Growth anomaly	tentacle	gastrodermis	Gram Negative	cocci	212.88	21	9.8645
17830-13A	Porites compressa	O‘ahu	2004-04-15	Growth anomaly	tentacle	gastrodermis	Gram Negative	cocci	212.88	21	9.8645
17830-13A	Porites compressa	O‘ahu	2004-04-15	Growth anomaly	tentacle	gastrodermis	Gram Negative	cocci	212.88	21	9.8645
17830-13A	Porites compressa	O‘ahu	2004-04-15	Growth anomaly	tentacle	gastrodermis	Gram Negative	cocci	212.88	21	9.8645
17830-13A	Porites compressa	O‘ahu	2004-04-15	Growth anomaly	tentacle	gastrodermis	Gram Negative	undetermined	212.88	21	9.8645
17830-13A	Porites compressa	O‘ahu	2004-04-15	Growth anomaly	tentacle	gastrodermis	Gram Negative	undetermined	212.88	21	9.8645
17830-13A	Porites compressa	O‘ahu	2004-04-15	Growth anomaly	tentacle	gastrodermis	Gram Negative	cocci	212.88	21	9.8645
17830-13A	Porites compressa	O‘ahu	2004-04-15	Growth anomaly	tentacle	gastrodermis	Gram Negative	cocci	212.88	21	9.8645
17830-13A	Porites compressa	O‘ahu	2004-04-15	Growth anomaly	tentacle	gastrodermis	Gram Negative	bacilli	212.88	21	9.8645
17830-13B	Porites compressa	O‘ahu	2004-04-15	Growth anomaly	tentacle	gastrodermis	Gram Negative	cocci	142.17	11	7.73701
17830-13B	Porites compressa	O‘ahu	2004-04-15	Growth anomaly	tentacle	gastrodermis	Gram Negative	cocci	142.17	11	7.73701
17830-13B	Porites compressa	O‘ahu	2004-04-15	Growth anomaly	tentacle	gastrodermis	Gram Negative	cocci	142.17	11	7.73701
17830-13B	Porites compressa	O‘ahu	2004-04-15	Growth anomaly	tentacle	gastrodermis	Gram Negative	undetermined	142.17	11	7.73701
17830-13B	Porites compressa	O‘ahu	2004-04-15	Growth anomaly	tentacle	gastrodermis	Gram Negative	cocci	142.17	11	7.73701
17830-13B	Porites compressa	O‘ahu	2004-04-15	Growth anomaly	tentacle	gastrodermis	Gram Negative	cocci	142.17	11	7.73701
17830-13B	Porites compressa	O‘ahu	2004-04-15	Growth anomaly	coenenchyme	gastrodermis	Gram Negative	cocci	142.17	11	7.73701
17830-13B	Porites compressa	O‘ahu	2004-04-15	Growth anomaly	tentacle	gastrodermis	Gram Negative	cocci	142.17	11	7.73701
17830-13B	Porites compressa	O‘ahu	2004-04-15	Growth anomaly	tentacle	gastrodermis	Gram Negative	cocci	142.17	11	7.73701
17830-13B	Porites compressa	O‘ahu	2004-04-15	Growth anomaly	tentacle	gastrodermis	Gram Negative	cocci	142.17	11	7.73701
17830-13B	Porites compressa	O‘ahu	2004-04-15	Growth anomaly	mesentery	gastrodermis	Gram Negative	cocci	142.17	11	7.73701
17830-15A	Porites lobata	O‘ahu	2004-05-14	Discoloration	coenenchyme	gastrodermis	Gram Positive	cocci	295.78	23	7.77602
17830-15A	Porites lobata	O‘ahu	2004-05-14	Discoloration	coenenchyme	gastrodermis	Gram Positive	cocci	295.78	23	7.77602
17830-15A	Porites lobata	O‘ahu	2004-05-14	Discoloration	coenenchyme	gastrodermis	Gram Positive	cocci	295.78	23	7.77602
17830-15A	Porites lobata	O‘ahu	2004-05-14	Discoloration	coenenchyme	gastrodermis	Gram Negative	cocci	295.78	23	7.77602
17830-15A	Porites lobata	O‘ahu	2004-05-14	Discoloration	tentacle	gastrodermis	Gram Negative	cocci	295.78	23	7.77602
17830-15A	Porites lobata	O‘ahu	2004-05-14	Discoloration	tentacle	gastrodermis	Gram Negative	cocci	295.78	23	7.77602
17830-15A	Porites lobata	O‘ahu	2004-05-14	Discoloration	tentacle	gastrodermis	Gram Negative	cocci	295.78	23	7.77602
17830-15A	Porites lobata	O‘ahu	2004-05-14	Discoloration	tentacle	gastrodermis	Gram Negative	cocci	295.78	23	7.77602
17830-15A	Porites lobata	O‘ahu	2004-05-14	Discoloration	tentacle	gastrodermis	Gram Negative	cocci	295.78	23	7.77602
17830-15A	Porites lobata	O‘ahu	2004-05-14	Discoloration	tentacle	gastrodermis	Gram Negative	cocci	295.78	23	7.77602
17830-15A	Porites lobata	O‘ahu	2004-05-14	Discoloration	coenenchyme	gastrodermis	Gram Negative	cocci	295.78	23	7.77602
17830-15A	Porites lobata	O‘ahu	2004-05-14	Discoloration	coenenchyme	gastrodermis	Gram Negative	cocci	295.78	23	7.77602
17830-15A	Porites lobata	O‘ahu	2004-05-14	Discoloration	coenenchyme	gastrodermis	Gram Negative	cocci	295.78	23	7.77602
17830-15A	Porites lobata	O‘ahu	2004-05-14	Discoloration	mesentery	gastrodermis	Gram Negative	cocci	295.78	23	7.77602
17830-15A	Porites lobata	O‘ahu	2004-05-14	Discoloration	coenenchyme	gastrodermis	Gram Negative	cocci	295.78	23	7.77602
17830-15A	Porites lobata	O‘ahu	2004-05-14	Discoloration	coenenchyme	gastrodermis	Gram Negative	cocci	295.78	23	7.77602
17830-15A	Porites lobata	O‘ahu	2004-05-14	Discoloration	coenenchyme	gastrodermis	Gram Negative	cocci	295.78	23	7.77602
17830-15A	Porites lobata	O‘ahu	2004-05-14	Discoloration	coenenchyme	gastrodermis	Gram Negative	cocci	295.78	23	7.77602
17830-15A	Porites lobata	O‘ahu	2004-05-14	Discoloration	coenenchyme	gastrodermis	Gram Negative	cocci	295.78	23	7.77602
17830-15A	Porites lobata	O‘ahu	2004-05-14	Discoloration	coenenchyme	gastrodermis	Gram Negative	cocci	295.78	23	7.77602
17830-15A	Porites lobata	O‘ahu	2004-05-14	Discoloration	coenenchyme	gastrodermis	Gram Negative	cocci	295.78	23	7.77602
17830-15A	Porites lobata	O‘ahu	2004-05-14	Discoloration	coenenchyme	gastrodermis	Gram Negative	cocci	295.78	23	7.77602
17830-15A	Porites lobata	O‘ahu	2004-05-14	Discoloration	tentacle	gastrodermis	Gram Negative	cocci	295.78	23	7.77602
17830-17A	Porites lobata	O‘ahu	2004-05-14	Tissue loss	skeleton		Gram Negative	cocci	328.18	14	4.266
17830-17A	Porites lobata	O‘ahu	2004-05-14	Tissue loss	coenenchyme	gastrodermis	Gram Negative	cocci	328.18	14	4.266
17830-17A	Porites lobata	O‘ahu	2004-05-14	Tissue loss	mesentery	gastrodermis	Gram Negative	cocci	328.18	14	4.266
17830-17A	Porites lobata	O‘ahu	2004-05-14	Tissue loss	coenenchyme	gastrodermis	Gram Negative	cocci	328.18	14	4.266
17830-17A	Porites lobata	O‘ahu	2004-05-14	Tissue loss	coenenchyme	gastrodermis	Gram Negative	cocci	328.18	14	4.266
17830-17A	Porites lobata	O‘ahu	2004-05-14	Tissue loss	coenenchyme	gastrodermis	Gram Negative	cocci	328.18	14	4.266
17830-17A	Porites lobata	O‘ahu	2004-05-14	Tissue loss	coenenchyme	gastrodermis	Gram Negative	cocci	328.18	14	4.266
17830-17A	Porites lobata	O‘ahu	2004-05-14	Tissue loss	coenenchyme	gastrodermis	Gram Negative	cocci	328.18	14	4.266
17830-17A	Porites lobata	O‘ahu	2004-05-14	Tissue loss	coenenchyme	gastrodermis	Gram Negative	cocci	328.18	14	4.266
17830-17A	Porites lobata	O‘ahu	2004-05-14	Tissue loss	tentacle	gastrodermis	Gram Negative	cocci	328.18	14	4.266
17830-17A	Porites lobata	O‘ahu	2004-05-14	Tissue loss	mesentery	gastrodermis	Gram Negative	cocci	328.18	14	4.266
17830-17A	Porites lobata	O‘ahu	2004-05-14	Tissue loss	mesentery	gastrodermis	Gram Negative	cocci	328.18	14	4.266
17830-17A	Porites lobata	O‘ahu	2004-05-14	Tissue loss	coenenchyme	gastrodermis	Gram Negative	cocci	328.18	14	4.266
17830-17A	Porites lobata	O‘ahu	2004-05-14	Tissue loss	coenenchyme	gastrodermis	Gram Negative	cocci	328.18	14	4.266
17830-18A	Porites lobata	O‘ahu	2004-05-14	Tissue loss	coenenchyme	gastrodermis	Gram Negative	cocci	331.69	6	1.80891
17830-18A	Porites lobata	O‘ahu	2004-05-14	Tissue loss	coenenchyme	gastrodermis	Gram Negative	cocci	331.69	6	1.80891
17830-18A	Porites lobata	O‘ahu	2004-05-14	Tissue loss	coenenchyme	gastrodermis	Gram Negative	cocci	331.69	6	1.80891
17830-18A	Porites lobata	O‘ahu	2004-05-14	Tissue loss	coenenchyme	gastrodermis	Gram Negative	cocci	331.69	6	1.80891
17830-18A	Porites lobata	O‘ahu	2004-05-14	Tissue loss	coenenchyme	gastrodermis	Gram Negative	cocci	331.69	6	1.80891
17830-18A	Porites lobata	O‘ahu	2004-05-14	Tissue loss	tentacle	gastrodermis	Gram Negative	cocci	331.69	6	1.80891
17830-21A	Porites lobata	O‘ahu	2004-05-14	Growth anomaly	coenenchyme	gastrodermis	Gram Negative	cocci	222.24	1	0.449967
17830-38A	Pocillopora meandrina	O‘ahu	2004-05-14	Discoloration	tentacle	epidermis	Gram Negative	undetermined	204.78	2	0.976636
17830-38A	Pocillopora meandrina	O‘ahu	2004-05-14	Discoloration	tentacle	epidermis	Gram Positive	undetermined	204.78	2	0.976636
17830-3A	Porites lobata	O‘ahu	2004-04-14	Discoloration	coenenchyme	gastrodermis	Gram Negative	cocci	204.19	1	0.489752
17830-3B	Porites lobata	O‘ahu	2004-04-14	Discoloration	tentacle	gastrodermis	Gram Negative	cocci	171.93	3	1.74491
17830-3B	Porites lobata	O‘ahu	2004-04-14	Discoloration	tentacle	gastrodermis	Gram Negative	cocci	171.93	3	1.74491
17830-3B	Porites lobata	O‘ahu	2004-04-14	Discoloration	tentacle	gastrodermis	Gram Negative	cocci	171.93	3	1.74491
17830-41A	Porites lobata	O‘ahu	2004-07-09	Discoloration	coenenchyme	gastrodermis	Gram Negative	cocci	284.66	2	0.702587
17830-41A	Porites lobata	O‘ahu	2004-07-09	Discoloration	coenenchyme	gastrodermis	Gram Negative	cocci	284.66	2	0.702587
17830-42B	Porites lobata	O‘ahu	2004-07-09	Discoloration	tentacle	gastrodermis	Gram Negative	cocci	183.02	49	26.773
17830-42B	Porites lobata	O‘ahu	2004-07-09	Discoloration	tentacle	gastrodermis	Gram Negative	cocci	183.02	49	26.773
17830-42B	Porites lobata	O‘ahu	2004-07-09	Discoloration	tentacle	gastrodermis	Gram Negative	cocci	183.02	49	26.773
17830-42B	Porites lobata	O‘ahu	2004-07-09	Discoloration	tentacle	gastrodermis	Gram Negative	cocci	183.02	49	26.773
17830-42B	Porites lobata	O‘ahu	2004-07-09	Discoloration	tentacle	gastrodermis	Gram Negative	cocci	183.02	49	26.773
17830-42B	Porites lobata	O‘ahu	2004-07-09	Discoloration	tentacle	gastrodermis	Gram Negative	cocci	183.02	49	26.773
17830-42B	Porites lobata	O‘ahu	2004-07-09	Discoloration	tentacle	gastrodermis	Gram Negative	cocci	183.02	49	26.773
17830-42B	Porites lobata	O‘ahu	2004-07-09	Discoloration	tentacle	gastrodermis	Gram Negative	cocci	183.02	49	26.773
17830-42B	Porites lobata	O‘ahu	2004-07-09	Discoloration	tentacle	gastrodermis	Gram Negative	cocci	183.02	49	26.773
17830-42B	Porites lobata	O‘ahu	2004-07-09	Discoloration	tentacle	gastrodermis	Gram Negative	cocci	183.02	49	26.773
17830-42B	Porites lobata	O‘ahu	2004-07-09	Discoloration	tentacle	gastrodermis	Gram Negative	cocci	183.02	49	26.773
17830-42B	Porites lobata	O‘ahu	2004-07-09	Discoloration	tentacle	gastrodermis	Gram Negative	cocci	183.02	49	26.773
17830-42B	Porites lobata	O‘ahu	2004-07-09	Discoloration	tentacle	gastrodermis	Gram Negative	cocci	183.02	49	26.773
17830-42B	Porites lobata	O‘ahu	2004-07-09	Discoloration	tentacle	gastrodermis	Gram Negative	cocci	183.02	49	26.773
17830-42B	Porites lobata	O‘ahu	2004-07-09	Discoloration	tentacle	gastrodermis	Gram Negative	cocci	183.02	49	26.773
17830-42B	Porites lobata	O‘ahu	2004-07-09	Discoloration	tentacle	gastrodermis	Gram Negative	cocci	183.02	49	26.773
17830-42B	Porites lobata	O‘ahu	2004-07-09	Discoloration	tentacle	gastrodermis	Gram Negative	cocci	183.02	49	26.773
17830-42B	Porites lobata	O‘ahu	2004-07-09	Discoloration	coenenchyme	gastrodermis	Gram Negative	cocci	183.02	49	26.773
17830-42B	Porites lobata	O‘ahu	2004-07-09	Discoloration	coenenchyme	gastrodermis	Gram Negative	cocci	183.02	49	26.773
17830-42B	Porites lobata	O‘ahu	2004-07-09	Discoloration	coenenchyme	gastrodermis	Gram Negative	cocci	183.02	49	26.773
17830-42B	Porites lobata	O‘ahu	2004-07-09	Discoloration	tentacle	gastrodermis	Gram Negative	cocci	183.02	49	26.773
17830-42B	Porites lobata	O‘ahu	2004-07-09	Discoloration	tentacle	gastrodermis	Gram Negative	cocci	183.02	49	26.773
17830-42B	Porites lobata	O‘ahu	2004-07-09	Discoloration	tentacle	gastrodermis	Gram Negative	cocci	183.02	49	26.773
17830-42B	Porites lobata	O‘ahu	2004-07-09	Discoloration	tentacle	gastrodermis	Gram Negative	cocci	183.02	49	26.773
17830-42B	Porites lobata	O‘ahu	2004-07-09	Discoloration	tentacle	gastrodermis	Gram Negative	cocci	183.02	49	26.773
17830-42B	Porites lobata	O‘ahu	2004-07-09	Discoloration	tentacle	gastrodermis	Gram Negative	cocci	183.02	49	26.773
17830-42B	Porites lobata	O‘ahu	2004-07-09	Discoloration	tentacle	gastrodermis	Gram Negative	cocci	183.02	49	26.773
17830-42B	Porites lobata	O‘ahu	2004-07-09	Discoloration	tentacle	gastrodermis	Gram Negative	cocci	183.02	49	26.773
17830-42B	Porites lobata	O‘ahu	2004-07-09	Discoloration	tentacle	gastrodermis	Gram Negative	cocci	183.02	49	26.773
17830-42B	Porites lobata	O‘ahu	2004-07-09	Discoloration	tentacle	gastrodermis	Gram Negative	cocci	183.02	49	26.773
17830-42B	Porites lobata	O‘ahu	2004-07-09	Discoloration	coenenchyme	gastrodermis	Gram Negative	cocci	183.02	49	26.773
17830-42B	Porites lobata	O‘ahu	2004-07-09	Discoloration	tentacle	gastrodermis	Gram Negative	cocci	183.02	49	26.773
17830-42B	Porites lobata	O‘ahu	2004-07-09	Discoloration	tentacle	gastrodermis	Gram Negative	cocci	183.02	49	26.773
17830-42B	Porites lobata	O‘ahu	2004-07-09	Discoloration	tentacle	gastrodermis	Gram Negative	cocci	183.02	49	26.773
17830-42B	Porites lobata	O‘ahu	2004-07-09	Discoloration	tentacle	gastrodermis	Gram Negative	cocci	183.02	49	26.773
17830-42B	Porites lobata	O‘ahu	2004-07-09	Discoloration	tentacle	gastrodermis	Gram Negative	cocci	183.02	49	26.773
17830-42B	Porites lobata	O‘ahu	2004-07-09	Discoloration	coenenchyme	gastrodermis	Gram Negative	cocci	183.02	49	26.773
17830-42B	Porites lobata	O‘ahu	2004-07-09	Discoloration	tentacle	gastrodermis	Gram Negative	cocci	183.02	49	26.773
17830-42B	Porites lobata	O‘ahu	2004-07-09	Discoloration	tentacle	gastrodermis	Gram Negative	cocci	183.02	49	26.773
17830-42B	Porites lobata	O‘ahu	2004-07-09	Discoloration	tentacle	gastrodermis	Gram Negative	cocci	183.02	49	26.773
17830-42B	Porites lobata	O‘ahu	2004-07-09	Discoloration	tentacle	gastrodermis	Gram Negative	cocci	183.02	49	26.773
17830-42B	Porites lobata	O‘ahu	2004-07-09	Discoloration	coenenchyme	gastrodermis	Gram Negative	cocci	183.02	49	26.773
17830-42B	Porites lobata	O‘ahu	2004-07-09	Discoloration	coenenchyme	gastrodermis	Gram Negative	cocci	183.02	49	26.773
17830-42B	Porites lobata	O‘ahu	2004-07-09	Discoloration	coenenchyme	gastrodermis	Gram Negative	cocci	183.02	49	26.773
17830-42B	Porites lobata	O‘ahu	2004-07-09	Discoloration	coenenchyme	gastrodermis	Gram Negative	cocci	183.02	49	26.773
17830-42B	Porites lobata	O‘ahu	2004-07-09	Discoloration	coenenchyme	gastrodermis	Gram Negative	cocci	183.02	49	26.773
17830-42B	Porites lobata	O‘ahu	2004-07-09	Discoloration	tentacle	gastrodermis	Gram Negative	cocci	183.02	49	26.773
17830-42B	Porites lobata	O‘ahu	2004-07-09	Discoloration	tentacle	gastrodermis	Gram Negative	cocci	183.02	49	26.773
17830-42B	Porites lobata	O‘ahu	2004-07-09	Discoloration	tentacle	gastrodermis	Gram Negative	cocci	183.02	49	26.773
17830-6A	Porites lobata	O‘ahu	2004-04-14	Discoloration	tentacle	gastrodermis	Gram Negative	cocci	209.26	4	1.91151
17830-6A	Porites lobata	O‘ahu	2004-04-14	Discoloration	tentacle	gastrodermis	Gram Negative	cocci	209.26	4	1.91151
17830-6A	Porites lobata	O‘ahu	2004-04-14	Discoloration	tentacle	gastrodermis	Gram Negative	cocci	209.26	4	1.91151
17830-6A	Porites lobata	O‘ahu	2004-04-14	Discoloration	tentacle	gastrodermis	Gram Negative	cocci	209.26	4	1.91151
17842-6A	Porites compressa	O‘ahu	2004-06-24	Growth anomaly	mesentery	gastrodermis	Gram Negative	bacilli	183.07	6	3.27744
17842-6A	Porites compressa	O‘ahu	2004-06-24	Growth anomaly	coenenchyme	gastrodermis	Gram Negative	bacilli	183.07	6	3.27744
17842-6A	Porites compressa	O‘ahu	2004-06-24	Growth anomaly	mesentery	gastrodermis	Gram Negative	bacilli	183.07	6	3.27744
17842-6A	Porites compressa	O‘ahu	2004-06-24	Growth anomaly	mesentery	gastrodermis	Gram Negative	bacilli	183.07	6	3.27744
17842-6A	Porites compressa	O‘ahu	2004-06-24	Growth anomaly	mesentery	gastrodermis	Gram Negative	bacilli	183.07	6	3.27744
17842-6A	Porites compressa	O‘ahu	2004-06-24	Growth anomaly	mesentery	gastrodermis	Gram Negative	bacilli	183.07	6	3.27744
17842-6B	Porites compressa	O‘ahu	2004-06-24	Growth anomaly	coenenchyme	gastrodermis	Gram Negative	bacilli	131.88	12	9.09912
17842-6B	Porites compressa	O‘ahu	2004-06-24	Growth anomaly	tentacle	gastrodermis	Gram Negative	bacilli	131.88	12	9.09912
17842-6B	Porites compressa	O‘ahu	2004-06-24	Growth anomaly	tentacle	gastrodermis	Gram Negative	bacilli	131.88	12	9.09912
17842-6B	Porites compressa	O‘ahu	2004-06-24	Growth anomaly	tentacle	gastrodermis	Gram Negative	bacilli	131.88	12	9.09912
17842-6B	Porites compressa	O‘ahu	2004-06-24	Growth anomaly	tentacle	gastrodermis	Gram Negative	bacilli	131.88	12	9.09912
17842-6B	Porites compressa	O‘ahu	2004-06-24	Growth anomaly	tentacle	gastrodermis	Gram Negative	bacilli	131.88	12	9.09912
17842-6B	Porites compressa	O‘ahu	2004-06-24	Growth anomaly	tentacle	gastrodermis	Gram Negative	bacilli	131.88	12	9.09912
17842-6B	Porites compressa	O‘ahu	2004-06-24	Growth anomaly	tentacle	gastrodermis	Gram Negative	bacilli	131.88	12	9.09912
17842-6B	Porites compressa	O‘ahu	2004-06-24	Growth anomaly	tentacle	gastrodermis	Gram Negative	cocci	131.88	12	9.09912
17842-6B	Porites compressa	O‘ahu	2004-06-24	Growth anomaly	tentacle	gastrodermis	Gram Negative	undetermined	131.88	12	9.09912
17842-6B	Porites compressa	O‘ahu	2004-06-24	Growth anomaly	tentacle	gastrodermis	Gram Negative	bacilli	131.88	12	9.09912
17842-6B	Porites compressa	O‘ahu	2004-06-24	Growth anomaly	tentacle	gastrodermis	Gram Negative	bacilli	131.88	12	9.09912
17842-7A	Porites compressa	O‘ahu	2004-06-24	Growth anomaly	coenenchyme	gastrodermis	Gram Negative	bacilli	163.27	6	3.67493
17842-7A	Porites compressa	O‘ahu	2004-06-24	Growth anomaly	tentacle	gastrodermis	Gram Negative	cocci	163.27	6	3.67493
17842-7A	Porites compressa	O‘ahu	2004-06-24	Growth anomaly	tentacle	gastrodermis	Gram Negative	cocci	163.27	6	3.67493
17842-7A	Porites compressa	O‘ahu	2004-06-24	Growth anomaly	tentacle	gastrodermis	Gram Negative	bacilli	163.27	6	3.67493
17842-7A	Porites compressa	O‘ahu	2004-06-24	Growth anomaly	tentacle	gastrodermis	Gram Negative	cocci	163.27	6	3.67493
17842-7A	Porites compressa	O‘ahu	2004-06-24	Growth anomaly	tentacle	gastrodermis	Gram Negative	cocci	163.27	6	3.67493
17842-7B	Porites compressa	O‘ahu	2004-06-24	Growth anomaly	coenenchyme	gastrodermis	Gram Negative	cocci	359.54	25	6.95341
17842-7B	Porites compressa	O‘ahu	2004-06-24	Growth anomaly	tentacle	gastrodermis	Gram Negative	cocci	359.54	25	6.95341
17842-7B	Porites compressa	O‘ahu	2004-06-24	Growth anomaly	tentacle	gastrodermis	Gram Negative	cocci	359.54	25	6.95341
17842-7B	Porites compressa	O‘ahu	2004-06-24	Growth anomaly	tentacle	gastrodermis	Gram Negative	undetermined	359.54	25	6.95341
17842-7B	Porites compressa	O‘ahu	2004-06-24	Growth anomaly	tentacle	gastrodermis	Gram Negative	undetermined	359.54	25	6.95341
17842-7B	Porites compressa	O‘ahu	2004-06-24	Growth anomaly	tentacle	gastrodermis	Gram Negative	undetermined	359.54	25	6.95341
17842-7B	Porites compressa	O‘ahu	2004-06-24	Growth anomaly	coenenchyme	gastrodermis	Gram Negative	bacilli	359.54	25	6.95341
17842-7B	Porites compressa	O‘ahu	2004-06-24	Growth anomaly	coenenchyme	gastrodermis	Gram Negative	undetermined	359.54	25	6.95341
17842-7B	Porites compressa	O‘ahu	2004-06-24	Growth anomaly	tentacle	gastrodermis	Gram Negative	bacilli	359.54	25	6.95341
17842-7B	Porites compressa	O‘ahu	2004-06-24	Growth anomaly	tentacle	gastrodermis	Gram Negative	bacilli	359.54	25	6.95341
17842-7B	Porites compressa	O‘ahu	2004-06-24	Growth anomaly	tentacle	gastrodermis	Gram Negative	cocci	359.54	25	6.95341
17842-7B	Porites compressa	O‘ahu	2004-06-24	Growth anomaly	tentacle	gastrodermis	Gram Negative	cocci	359.54	25	6.95341
17842-7B	Porites compressa	O‘ahu	2004-06-24	Growth anomaly	tentacle	gastrodermis	Gram Negative	undetermined	359.54	25	6.95341
17842-7B	Porites compressa	O‘ahu	2004-06-24	Growth anomaly	tentacle	gastrodermis	Gram Negative	undetermined	359.54	25	6.95341
17842-7B	Porites compressa	O‘ahu	2004-06-24	Growth anomaly	mesentery	gastrodermis	Gram Negative	undetermined	359.54	25	6.95341
17842-7B	Porites compressa	O‘ahu	2004-06-24	Growth anomaly	mesentery	gastrodermis	Gram Negative	bacilli	359.54	25	6.95341
17842-7B	Porites compressa	O‘ahu	2004-06-24	Growth anomaly	coenenchyme	gastrodermis	Gram Negative	bacilli	359.54	25	6.95341
17842-7B	Porites compressa	O‘ahu	2004-06-24	Growth anomaly	tentacle	gastrodermis	Gram Negative	bacilli	359.54	25	6.95341
17842-7B	Porites compressa	O‘ahu	2004-06-24	Growth anomaly	tentacle	gastrodermis	Gram Negative	cocci	359.54	25	6.95341
17842-7B	Porites compressa	O‘ahu	2004-06-24	Growth anomaly	tentacle	gastrodermis	Gram Negative	bacilli	359.54	25	6.95341
17842-7B	Porites compressa	O‘ahu	2004-06-24	Growth anomaly	tentacle	gastrodermis	Gram Negative	bacilli	359.54	25	6.95341
17842-7B	Porites compressa	O‘ahu	2004-06-24	Growth anomaly	coenenchyme	gastrodermis	Gram Negative	undetermined	359.54	25	6.95341
17842-7B	Porites compressa	O‘ahu	2004-06-24	Growth anomaly	tentacle	gastrodermis	Gram Negative	bacilli	359.54	25	6.95341
17842-7B	Porites compressa	O‘ahu	2004-06-24	Growth anomaly	tentacle	gastrodermis	Gram Negative	bacilli	359.54	25	6.95341
17842-7B	Porites compressa	O‘ahu	2004-06-24	Growth anomaly	coenenchyme	gastrodermis	Gram Negative	bacilli	359.54	25	6.95341
17929-26A	Porites lobata	Maro Reef	2004-09-23	Discoloration	coenenchyme	gastrodermis	Gram Negative	cocci	320.98	16	4.98469
17929-26A	Porites lobata	Maro Reef	2004-09-23	Discoloration	tentacle	gastrodermis	Gram Negative	cocci	320.98	16	4.98469
17929-26A	Porites lobata	Maro Reef	2004-09-23	Discoloration	coenenchyme	gastrodermis	Gram Negative	cocci	320.98	16	4.98469
17929-26A	Porites lobata	Maro Reef	2004-09-23	Discoloration	coenenchyme	gastrodermis	Gram Negative	cocci	320.98	16	4.98469
17929-26A	Porites lobata	Maro Reef	2004-09-23	Discoloration	coenenchyme	gastrodermis	Gram Negative	cocci	320.98	16	4.98469
17929-26A	Porites lobata	Maro Reef	2004-09-23	Discoloration	coenenchyme	gastrodermis	Gram Negative	cocci	320.98	16	4.98469
17929-26A	Porites lobata	Maro Reef	2004-09-23	Discoloration	coenenchyme	gastrodermis	Gram Negative	cocci	320.98	16	4.98469
17929-26A	Porites lobata	Maro Reef	2004-09-23	Discoloration	coenenchyme	gastrodermis	Gram Negative	cocci	320.98	16	4.98469
17929-26A	Porites lobata	Maro Reef	2004-09-23	Discoloration	coenenchyme	gastrodermis	Gram Negative	cocci	320.98	16	4.98469
17929-26A	Porites lobata	Maro Reef	2004-09-23	Discoloration	coenenchyme	gastrodermis	Gram Negative	cocci	320.98	16	4.98469
17929-26A	Porites lobata	Maro Reef	2004-09-23	Discoloration	coenenchyme	gastrodermis	Gram Negative	cocci	320.98	16	4.98469
17929-26A	Porites lobata	Maro Reef	2004-09-23	Discoloration	coenenchyme	gastrodermis	Gram Negative	cocci	320.98	16	4.98469
17929-26A	Porites lobata	Maro Reef	2004-09-23	Discoloration	coenenchyme	gastrodermis	Gram Negative	cocci	320.98	16	4.98469
17929-26A	Porites lobata	Maro Reef	2004-09-23	Discoloration	coenenchyme	gastrodermis	Gram Negative	cocci	320.98	16	4.98469
17929-26A	Porites lobata	Maro Reef	2004-09-23	Discoloration	coenenchyme	gastrodermis	Gram Positive	cocci	320.98	16	4.98469
17929-26A	Porites lobata	Maro Reef	2004-09-23	Discoloration	coenenchyme	gastrodermis	Gram Positive	cocci	320.98	16	4.98469
17929-4A	Porites lobata	French Frigate Shoals	2004-09-17	Tissue loss	coenenchyme	gastrodermis	Gram Negative	cocci	407.44	12	2.94523
17929-4A	Porites lobata	French Frigate Shoals	2004-09-17	Tissue loss	tentacle	gastrodermis	Gram Negative	cocci	407.44	12	2.94523
17929-4A	Porites lobata	French Frigate Shoals	2004-09-17	Tissue loss	tentacle	gastrodermis	Gram Negative	cocci	407.44	12	2.94523
17929-4A	Porites lobata	French Frigate Shoals	2004-09-17	Tissue loss	tentacle	gastrodermis	Gram Negative	cocci	407.44	12	2.94523
17929-4A	Porites lobata	French Frigate Shoals	2004-09-17	Tissue loss	tentacle	gastrodermis	Gram Negative	cocci	407.44	12	2.94523
17929-4A	Porites lobata	French Frigate Shoals	2004-09-17	Tissue loss	coenenchyme	gastrodermis	Gram Negative	cocci	407.44	12	2.94523
17929-4A	Porites lobata	French Frigate Shoals	2004-09-17	Tissue loss	coenenchyme	gastrodermis	Gram Negative	cocci	407.44	12	2.94523
17929-4A	Porites lobata	French Frigate Shoals	2004-09-17	Tissue loss	tentacle	gastrodermis	Gram Negative	cocci	407.44	12	2.94523
17929-4A	Porites lobata	French Frigate Shoals	2004-09-17	Tissue loss	tentacle	gastrodermis	Gram Negative	cocci	407.44	12	2.94523
17929-4A	Porites lobata	French Frigate Shoals	2004-09-17	Tissue loss	tentacle	gastrodermis	Gram Negative	cocci	407.44	12	2.94523
17929-4A	Porites lobata	French Frigate Shoals	2004-09-17	Tissue loss	tentacle	gastrodermis	Gram Negative	cocci	407.44	12	2.94523
17929-4A	Porites lobata	French Frigate Shoals	2004-09-17	Tissue loss	coenenchyme	gastrodermis	Gram Negative	cocci	407.44	12	2.94523
17964-7A	Porites lobata	Island of Hawai‘i	2005-02-28	Growth anomaly	tentacle	gastrodermis	Gram Negative	cocci	445.33	23	5.16472
17964-7A	Porites lobata	Island of Hawai‘i	2005-02-28	Growth anomaly	tentacle	gastrodermis	Gram Negative	cocci	445.33	23	5.16472
17964-7A	Porites lobata	Island of Hawai‘i	2005-02-28	Growth anomaly	tentacle	gastrodermis	Gram Negative	cocci	445.33	23	5.16472
17964-7A	Porites lobata	Island of Hawai‘i	2005-02-28	Growth anomaly	coenenchyme	gastrodermis	Gram Negative	cocci	445.33	23	5.16472
17964-7A	Porites lobata	Island of Hawai‘i	2005-02-28	Growth anomaly	tentacle	gastrodermis	Gram Negative	cocci	445.33	23	5.16472
17964-7A	Porites lobata	Island of Hawai‘i	2005-02-28	Growth anomaly	tentacle	gastrodermis	Gram Negative	cocci	445.33	23	5.16472
17964-7A	Porites lobata	Island of Hawai‘i	2005-02-28	Growth anomaly	tentacle	gastrodermis	Gram Negative	cocci	445.33	23	5.16472
17964-7A	Porites lobata	Island of Hawai‘i	2005-02-28	Growth anomaly	tentacle	gastrodermis	Gram Negative	cocci	445.33	23	5.16472
17964-7A	Porites lobata	Island of Hawai‘i	2005-02-28	Growth anomaly	tentacle	gastrodermis	Gram Negative	cocci	445.33	23	5.16472
17964-7A	Porites lobata	Island of Hawai‘i	2005-02-28	Growth anomaly	tentacle	gastrodermis	Gram Negative	cocci	445.33	23	5.16472
17964-7A	Porites lobata	Island of Hawai‘i	2005-02-28	Growth anomaly	tentacle	gastrodermis	Gram Negative	cocci	445.33	23	5.16472
17964-7A	Porites lobata	Island of Hawai‘i	2005-02-28	Growth anomaly	tentacle	gastrodermis	Gram Negative	cocci	445.33	23	5.16472
17964-7A	Porites lobata	Island of Hawai‘i	2005-02-28	Growth anomaly	tentacle	gastrodermis	Gram Negative	cocci	445.33	23	5.16472
17964-7A	Porites lobata	Island of Hawai‘i	2005-02-28	Growth anomaly	tentacle	gastrodermis	Gram Negative	cocci	445.33	23	5.16472
17964-7A	Porites lobata	Island of Hawai‘i	2005-02-28	Growth anomaly	tentacle	gastrodermis	Gram Negative	cocci	445.33	23	5.16472
17964-7A	Porites lobata	Island of Hawai‘i	2005-02-28	Growth anomaly	tentacle	gastrodermis	Gram Negative	cocci	445.33	23	5.16472
17964-7A	Porites lobata	Island of Hawai‘i	2005-02-28	Growth anomaly	tentacle	gastrodermis	Gram Negative	cocci	445.33	23	5.16472
17964-7A	Porites lobata	Island of Hawai‘i	2005-02-28	Growth anomaly	tentacle	gastrodermis	Gram Negative	cocci	445.33	23	5.16472
17964-7A	Porites lobata	Island of Hawai‘i	2005-02-28	Growth anomaly	tentacle	gastrodermis	Gram Negative	cocci	445.33	23	5.16472
17964-7A	Porites lobata	Island of Hawai‘i	2005-02-28	Growth anomaly	coenenchyme	gastrodermis	Gram Negative	cocci	445.33	23	5.16472
17964-7A	Porites lobata	Island of Hawai‘i	2005-02-28	Growth anomaly	tentacle	gastrodermis	Gram Negative	cocci	445.33	23	5.16472
17964-7A	Porites lobata	Island of Hawai‘i	2005-02-28	Growth anomaly	tentacle	gastrodermis	Gram Negative	cocci	445.33	23	5.16472
17964-7A	Porites lobata	Island of Hawai‘i	2005-02-28	Growth anomaly	coenenchyme	gastrodermis	Gram Negative	cocci	445.33	23	5.16472
17964-8A	Porites lobata	Island of Hawai‘i	2005-02-28	Growth anomaly	coenenchyme	gastrodermis	Gram Negative	cocci	255.3	21	8.22566
17964-8A	Porites lobata	Island of Hawai‘i	2005-02-28	Growth anomaly	coenenchyme	gastrodermis	Gram Negative	cocci	255.3	21	8.22566
17964-8A	Porites lobata	Island of Hawai‘i	2005-02-28	Growth anomaly	coenenchyme	gastrodermis	Gram Negative	cocci	255.3	21	8.22566
17964-8A	Porites lobata	Island of Hawai‘i	2005-02-28	Growth anomaly	coenenchyme	gastrodermis	Gram Negative	cocci	255.3	21	8.22566
17964-8A	Porites lobata	Island of Hawai‘i	2005-02-28	Growth anomaly	coenenchyme	gastrodermis	Gram Negative	cocci	255.3	21	8.22566
17964-8A	Porites lobata	Island of Hawai‘i	2005-02-28	Growth anomaly	tentacle	gastrodermis	Gram Negative	cocci	255.3	21	8.22566
17964-8A	Porites lobata	Island of Hawai‘i	2005-02-28	Growth anomaly	coenenchyme	gastrodermis	Gram Negative	cocci	255.3	21	8.22566
17964-8A	Porites lobata	Island of Hawai‘i	2005-02-28	Growth anomaly	coenenchyme	gastrodermis	Gram Negative	cocci	255.3	21	8.22566
17964-8A	Porites lobata	Island of Hawai‘i	2005-02-28	Growth anomaly	coenenchyme	gastrodermis	Gram Positive	bacilli	255.3	21	8.22566
17964-8A	Porites lobata	Island of Hawai‘i	2005-02-28	Growth anomaly	coenenchyme	gastrodermis	Gram Positive	bacilli	255.3	21	8.22566
17964-8A	Porites lobata	Island of Hawai‘i	2005-02-28	Growth anomaly	coenenchyme	gastrodermis	Gram Positive	bacilli	255.3	21	8.22566
17964-8A	Porites lobata	Island of Hawai‘i	2005-02-28	Growth anomaly	mesentery	gastrodermis	Gram Positive	bacilli	255.3	21	8.22566
17964-8A	Porites lobata	Island of Hawai‘i	2005-02-28	Growth anomaly	coenenchyme	gastrodermis	Gram Positive	bacilli	255.3	21	8.22566
17964-8A	Porites lobata	Island of Hawai‘i	2005-02-28	Growth anomaly	tentacle	gastrodermis	Gram Positive	bacilli	255.3	21	8.22566
17964-8A	Porites lobata	Island of Hawai‘i	2005-02-28	Growth anomaly	mesentery	gastrodermis	Gram Positive	bacilli	255.3	21	8.22566
17964-8A	Porites lobata	Island of Hawai‘i	2005-02-28	Growth anomaly	coenenchyme	gastrodermis	Gram Positive	cocci	255.3	21	8.22566
17964-8A	Porites lobata	Island of Hawai‘i	2005-02-28	Growth anomaly	coenenchyme	gastrodermis	Gram Positive	bacilli	255.3	21	8.22566
17964-8A	Porites lobata	Island of Hawai‘i	2005-02-28	Growth anomaly	coenenchyme	gastrodermis	Gram Positive	bacilli	255.3	21	8.22566
17964-8A	Porites lobata	Island of Hawai‘i	2005-02-28	Growth anomaly	coenenchyme	gastrodermis	Gram Positive	bacilli	255.3	21	8.22566
17964-8A	Porites lobata	Island of Hawai‘i	2005-02-28	Growth anomaly	coenenchyme	gastrodermis	Gram Positive	bacilli	255.3	21	8.22566
17964-8A	Porites lobata	Island of Hawai‘i	2005-02-28	Growth anomaly	coenenchyme	gastrodermis	Gram Positive	bacilli	255.3	21	8.22566
21404-15A	Porites compressa	Island of Hawai‘i	2010-02-18	Discoloration	coenenchyme	gastrodermis	Gram Negative	cocci	120.36	26	21.6026
21404-15A	Porites compressa	Island of Hawai‘i	2010-02-18	Discoloration	coenenchyme	gastrodermis	Gram Negative	cocci	120.36	26	21.6026
21404-15A	Porites compressa	Island of Hawai‘i	2010-02-18	Discoloration	coenenchyme	gastrodermis	Gram Negative	bacilli	120.36	26	21.6026
21404-15A	Porites compressa	Island of Hawai‘i	2010-02-18	Discoloration	coenenchyme	gastrodermis	Gram Negative	cocci	120.36	26	21.6026
21404-15A	Porites compressa	Island of Hawai‘i	2010-02-18	Discoloration	coenenchyme	gastrodermis	Gram Negative	cocci	120.36	26	21.6026
21404-15A	Porites compressa	Island of Hawai‘i	2010-02-18	Discoloration	coenenchyme	gastrodermis	Gram Negative	cocci	120.36	26	21.6026
21404-15A	Porites compressa	Island of Hawai‘i	2010-02-18	Discoloration	coenenchyme	gastrodermis	Gram Negative	cocci	120.36	26	21.6026
21404-15A	Porites compressa	Island of Hawai‘i	2010-02-18	Discoloration	coenenchyme	gastrodermis	Gram Negative	cocci	120.36	26	21.6026
21404-15A	Porites compressa	Island of Hawai‘i	2010-02-18	Discoloration	coenenchyme	gastrodermis	Gram Negative	cocci	120.36	26	21.6026
21404-15A	Porites compressa	Island of Hawai‘i	2010-02-18	Discoloration	coenenchyme	gastrodermis	Gram Negative	cocci	120.36	26	21.6026
21404-15A	Porites compressa	Island of Hawai‘i	2010-02-18	Discoloration	coenenchyme	gastrodermis	Gram Negative	cocci	120.36	26	21.6026
21404-15A	Porites compressa	Island of Hawai‘i	2010-02-18	Discoloration	coenenchyme	gastrodermis	Gram Negative	cocci	120.36	26	21.6026
21404-15A	Porites compressa	Island of Hawai‘i	2010-02-18	Discoloration	coenenchyme	gastrodermis	Gram Negative	cocci	120.36	26	21.6026
21404-15A	Porites compressa	Island of Hawai‘i	2010-02-18	Discoloration	coenenchyme	gastrodermis	Gram Negative	cocci	120.36	26	21.6026
21404-15A	Porites compressa	Island of Hawai‘i	2010-02-18	Discoloration	coenenchyme	gastrodermis	Gram Negative	cocci	120.36	26	21.6026
21404-15A	Porites compressa	Island of Hawai‘i	2010-02-18	Discoloration	coenenchyme	gastrodermis	Gram Negative	cocci	120.36	26	21.6026
21404-15A	Porites compressa	Island of Hawai‘i	2010-02-18	Discoloration	coenenchyme	gastrodermis	Gram Negative	cocci	120.36	26	21.6026
21404-15A	Porites compressa	Island of Hawai‘i	2010-02-18	Discoloration	coenenchyme	gastrodermis	Gram Negative	cocci	120.36	26	21.6026
21404-15A	Porites compressa	Island of Hawai‘i	2010-02-18	Discoloration	coenenchyme	gastrodermis	Gram Negative	cocci	120.36	26	21.6026
21404-15A	Porites compressa	Island of Hawai‘i	2010-02-18	Discoloration	coenenchyme	gastrodermis	Gram Negative	cocci	120.36	26	21.6026
21404-15A	Porites compressa	Island of Hawai‘i	2010-02-18	Discoloration	coenenchyme	gastrodermis	Gram Negative	cocci	120.36	26	21.6026
21404-15A	Porites compressa	Island of Hawai‘i	2010-02-18	Discoloration	coenenchyme	gastrodermis	Gram Negative	cocci	120.36	26	21.6026
21404-15A	Porites compressa	Island of Hawai‘i	2010-02-18	Discoloration	coenenchyme	gastrodermis	Gram Negative	cocci	120.36	26	21.6026
21404-15A	Porites compressa	Island of Hawai‘i	2010-02-18	Discoloration	coenenchyme	gastrodermis	Gram Negative	cocci	120.36	26	21.6026
21404-15A	Porites compressa	Island of Hawai‘i	2010-02-18	Discoloration	coenenchyme	gastrodermis	Gram Negative	cocci	120.36	26	21.6026
21404-15A	Porites compressa	Island of Hawai‘i	2010-02-18	Discoloration	coenenchyme	gastrodermis	Gram Negative	cocci	120.36	26	21.6026
21404-1A	Pocillopora meandrina	Island of Hawai‘i	2010-01-19	Bleaching	tentacle	epidermis	Gram Negative	bacilli	149.6	22	14.7056
21404-1A	Pocillopora meandrina	Island of Hawai‘i	2010-01-19	Bleaching	tentacle	epidermis	Gram Negative	bacilli	149.6	22	14.7056
21404-1A	Pocillopora meandrina	Island of Hawai‘i	2010-01-19	Bleaching	tentacle	epidermis	Gram Negative	bacilli	149.6	22	14.7056
21404-1A	Pocillopora meandrina	Island of Hawai‘i	2010-01-19	Bleaching	tentacle	epidermis	Gram Negative	bacilli	149.6	22	14.7056
21404-1A	Pocillopora meandrina	Island of Hawai‘i	2010-01-19	Bleaching	tentacle	epidermis	Gram Negative	undetermined	149.6	22	14.7056
21404-1A	Pocillopora meandrina	Island of Hawai‘i	2010-01-19	Bleaching	tentacle	epidermis	Gram Negative	undetermined	149.6	22	14.7056
21404-1A	Pocillopora meandrina	Island of Hawai‘i	2010-01-19	Bleaching	tentacle	epidermis	Gram Positive	undetermined	149.6	22	14.7056
21404-1A	Pocillopora meandrina	Island of Hawai‘i	2010-01-19	Bleaching	tentacle	epidermis	Gram Negative	undetermined	149.6	22	14.7056
21404-1A	Pocillopora meandrina	Island of Hawai‘i	2010-01-19	Bleaching	tentacle	epidermis	Gram Negative	undetermined	149.6	22	14.7056
21404-1A	Pocillopora meandrina	Island of Hawai‘i	2010-01-19	Bleaching	tentacle	epidermis	Gram Negative	undetermined	149.6	22	14.7056
21404-1A	Pocillopora meandrina	Island of Hawai‘i	2010-01-19	Bleaching	tentacle	epidermis	Gram Negative	undetermined	149.6	22	14.7056
21404-1A	Pocillopora meandrina	Island of Hawai‘i	2010-01-19	Bleaching	tentacle	epidermis	Gram Negative	undetermined	149.6	22	14.7056
21404-1A	Pocillopora meandrina	Island of Hawai‘i	2010-01-19	Bleaching	tentacle	epidermis	Gram Negative	undetermined	149.6	22	14.7056
21404-1A	Pocillopora meandrina	Island of Hawai‘i	2010-01-19	Bleaching	tentacle	epidermis	Gram Negative	undetermined	149.6	22	14.7056
21404-1A	Pocillopora meandrina	Island of Hawai‘i	2010-01-19	Bleaching	tentacle	epidermis	Gram Negative	bacilli	149.6	22	14.7056
21404-1A	Pocillopora meandrina	Island of Hawai‘i	2010-01-19	Bleaching	tentacle	epidermis	Gram Negative	undetermined	149.6	22	14.7056
21404-1A	Pocillopora meandrina	Island of Hawai‘i	2010-01-19	Bleaching	tentacle	epidermis	Gram Negative	undetermined	149.6	22	14.7056
21404-1A	Pocillopora meandrina	Island of Hawai‘i	2010-01-19	Bleaching	tentacle	epidermis	Gram Negative	undetermined	149.6	22	14.7056
21404-1A	Pocillopora meandrina	Island of Hawai‘i	2010-01-19	Bleaching	tentacle	epidermis	Gram Negative	undetermined	149.6	22	14.7056
21404-1A	Pocillopora meandrina	Island of Hawai‘i	2010-01-19	Bleaching	tentacle	epidermis	Gram Negative	undetermined	149.6	22	14.7056
21404-1A	Pocillopora meandrina	Island of Hawai‘i	2010-01-19	Bleaching	tentacle	epidermis	Gram Positive	undetermined	149.6	22	14.7056
21404-1A	Pocillopora meandrina	Island of Hawai‘i	2010-01-19	Bleaching	tentacle	epidermis	Gram Positive	undetermined	149.6	22	14.7056
21404-2A	Pocillopora meandrina	Island of Hawai‘i	2010-01-19	Apparently normal	tentacle	epidermis	Gram Negative	undetermined	214.99	8	3.72114
21404-2A	Pocillopora meandrina	Island of Hawai‘i	2010-01-19	Apparently normal	tentacle	epidermis	Gram Negative	undetermined	214.99	8	3.72114
21404-2A	Pocillopora meandrina	Island of Hawai‘i	2010-01-19	Apparently normal	tentacle	epidermis	Gram Positive	undetermined	214.99	8	3.72114
21404-2A	Pocillopora meandrina	Island of Hawai‘i	2010-01-19	Apparently normal	tentacle	epidermis	Gram Negative	bacilli	214.99	8	3.72114
21404-2A	Pocillopora meandrina	Island of Hawai‘i	2010-01-19	Apparently normal	tentacle	epidermis	Gram Negative	bacilli	214.99	8	3.72114
21404-2A	Pocillopora meandrina	Island of Hawai‘i	2010-01-19	Apparently normal	tentacle	epidermis	Gram Negative	bacilli	214.99	8	3.72114
21404-2A	Pocillopora meandrina	Island of Hawai‘i	2010-01-19	Apparently normal	tentacle	epidermis	Gram Negative	bacilli	214.99	8	3.72114
21404-2A	Pocillopora meandrina	Island of Hawai‘i	2010-01-19	Apparently normal	tentacle	epidermis	Gram Negative	bacilli	214.99	8	3.72114
21404-3A	Pocillopora meandrina	Island of Hawai‘i	2010-01-19	Bleaching	tentacle	epidermis	Gram Negative	bacilli	88.98	9	10.115
21404-3A	Pocillopora meandrina	Island of Hawai‘i	2010-01-19	Bleaching	tentacle	epidermis	Gram Negative	undetermined	88.98	9	10.115
21404-3A	Pocillopora meandrina	Island of Hawai‘i	2010-01-19	Bleaching	tentacle	epidermis	Gram Negative	undetermined	88.98	9	10.115
21404-3A	Pocillopora meandrina	Island of Hawai‘i	2010-01-19	Bleaching	tentacle	epidermis	Gram Positive	undetermined	88.98	9	10.115
21404-3A	Pocillopora meandrina	Island of Hawai‘i	2010-01-19	Bleaching	tentacle	mesoglea	Gram Negative	bacilli	88.98	9	10.115
21404-3A	Pocillopora meandrina	Island of Hawai‘i	2010-01-19	Bleaching	tentacle	epidermis	Gram Positive	bacilli	88.98	9	10.115
21404-3A	Pocillopora meandrina	Island of Hawai‘i	2010-01-19	Bleaching	tentacle	epidermis	Gram Positive	undetermined	88.98	9	10.115
21404-3A	Pocillopora meandrina	Island of Hawai‘i	2010-01-19	Bleaching	tentacle	epidermis	Gram Negative	undetermined	88.98	9	10.115
21404-3A	Pocillopora meandrina	Island of Hawai‘i	2010-01-19	Bleaching	tentacle	epidermis	Gram Negative	bacilli	88.98	9	10.115
21404-4A	Pocillopora meandrina	Island of Hawai‘i	2010-01-19	Apparently normal	tentacle	epidermis	Gram Negative	bacilli	174.7	23	13.1658
21404-4A	Pocillopora meandrina	Island of Hawai‘i	2010-01-19	Apparently normal	tentacle	epidermis	Gram Negative	bacilli	174.7	23	13.1658
21404-4A	Pocillopora meandrina	Island of Hawai‘i	2010-01-19	Apparently normal	tentacle	epidermis	Gram Negative	bacilli	174.7	23	13.1658
21404-4A	Pocillopora meandrina	Island of Hawai‘i	2010-01-19	Apparently normal	tentacle	epidermis	Gram Negative	bacilli	174.7	23	13.1658
21404-4A	Pocillopora meandrina	Island of Hawai‘i	2010-01-19	Apparently normal	tentacle	epidermis	Gram Negative	bacilli	174.7	23	13.1658
21404-4A	Pocillopora meandrina	Island of Hawai‘i	2010-01-19	Apparently normal	tentacle	mesoglea	Gram Negative	bacilli	174.7	23	13.1658
21404-4A	Pocillopora meandrina	Island of Hawai‘i	2010-01-19	Apparently normal	mesentery	mesoglea	Gram Negative	bacilli	174.7	23	13.1658
21404-4A	Pocillopora meandrina	Island of Hawai‘i	2010-01-19	Apparently normal	mesentery	epidermis	Gram Negative	bacilli	174.7	23	13.1658
21404-4A	Pocillopora meandrina	Island of Hawai‘i	2010-01-19	Apparently normal	tentacle	epidermis	Gram Negative	bacilli	174.7	23	13.1658
21404-4A	Pocillopora meandrina	Island of Hawai‘i	2010-01-19	Apparently normal	tentacle	epidermis	Gram Negative	bacilli	174.7	23	13.1658
21404-4A	Pocillopora meandrina	Island of Hawai‘i	2010-01-19	Apparently normal	tentacle	epidermis	Gram Negative	bacilli	174.7	23	13.1658
21404-4A	Pocillopora meandrina	Island of Hawai‘i	2010-01-19	Apparently normal	tentacle	epidermis	Gram Negative	bacilli	174.7	23	13.1658
21404-4A	Pocillopora meandrina	Island of Hawai‘i	2010-01-19	Apparently normal	tentacle	epidermis	Gram Positive	undetermined	174.7	23	13.1658
21404-4A	Pocillopora meandrina	Island of Hawai‘i	2010-01-19	Apparently normal	tentacle	mesoglea	Gram Negative	undetermined	174.7	23	13.1658
21404-4A	Pocillopora meandrina	Island of Hawai‘i	2010-01-19	Apparently normal	mesentery	mesoglea	Gram Negative	bacilli	174.7	23	13.1658
21404-4A	Pocillopora meandrina	Island of Hawai‘i	2010-01-19	Apparently normal	tentacle	epidermis	Gram Positive	undetermined	174.7	23	13.1658
21404-4A	Pocillopora meandrina	Island of Hawai‘i	2010-01-19	Apparently normal	tentacle	epidermis	Gram Negative	undetermined	174.7	23	13.1658
21404-4A	Pocillopora meandrina	Island of Hawai‘i	2010-01-19	Apparently normal	tentacle	epidermis	Gram Negative	undetermined	174.7	23	13.1658
21404-4A	Pocillopora meandrina	Island of Hawai‘i	2010-01-19	Apparently normal	tentacle	epidermis	Gram Negative	bacilli	174.7	23	13.1658
21404-4A	Pocillopora meandrina	Island of Hawai‘i	2010-01-19	Apparently normal	tentacle	epidermis	Gram Negative	bacilli	174.7	23	13.1658
21404-4A	Pocillopora meandrina	Island of Hawai‘i	2010-01-19	Apparently normal	tentacle	epidermis	Gram Negative	undetermined	174.7	23	13.1658
21404-4A	Pocillopora meandrina	Island of Hawai‘i	2010-01-19	Apparently normal	tentacle	epidermis	Gram Positive	undetermined	174.7	23	13.1658
21404-4A	Pocillopora meandrina	Island of Hawai‘i	2010-01-19	Apparently normal	tentacle	epidermis	Gram Positive	undetermined	174.7	23	13.1658
21404-5A	Pocillopora meandrina	Island of Hawai‘i	2010-01-19	Bleaching	tentacle	epidermis	Gram Positive	undetermined	82.6	12	14.5275
21404-5A	Pocillopora meandrina	Island of Hawai‘i	2010-01-19	Bleaching	tentacle	epidermis	Gram Positive	bacilli	82.6	12	14.5275
21404-5A	Pocillopora meandrina	Island of Hawai‘i	2010-01-19	Bleaching	tentacle	epidermis	Gram Negative	bacilli	82.6	12	14.5275
21404-5A	Pocillopora meandrina	Island of Hawai‘i	2010-01-19	Bleaching	tentacle	epidermis	Gram Negative	bacilli	82.6	12	14.5275
21404-5A	Pocillopora meandrina	Island of Hawai‘i	2010-01-19	Bleaching	tentacle	epidermis	Gram Negative	bacilli	82.6	12	14.5275
21404-5A	Pocillopora meandrina	Island of Hawai‘i	2010-01-19	Bleaching	tentacle	epidermis	Gram Negative	bacilli	82.6	12	14.5275
21404-5A	Pocillopora meandrina	Island of Hawai‘i	2010-01-19	Bleaching	tentacle	epidermis	Gram Negative	bacilli	82.6	12	14.5275
21404-5A	Pocillopora meandrina	Island of Hawai‘i	2010-01-19	Bleaching	tentacle	epidermis	Gram Negative	bacilli	82.6	12	14.5275
21404-5A	Pocillopora meandrina	Island of Hawai‘i	2010-01-19	Bleaching	tentacle	epidermis	Gram Negative	bacilli	82.6	12	14.5275
21404-5A	Pocillopora meandrina	Island of Hawai‘i	2010-01-19	Bleaching	tentacle	epidermis	Gram Negative	bacilli	82.6	12	14.5275
21404-5A	Pocillopora meandrina	Island of Hawai‘i	2010-01-19	Bleaching	tentacle	epidermis	Gram Negative	bacilli	82.6	12	14.5275
21404-5A	Pocillopora meandrina	Island of Hawai‘i	2010-01-19	Bleaching	tentacle	epidermis	Gram Negative	bacilli	82.6	12	14.5275
21404-6A	Pocillopora meandrina	Island of Hawai‘i	2010-01-19	Apparently normal	tentacle	epidermis	Gram Negative	bacilli	218.17	15	6.87546
21404-6A	Pocillopora meandrina	Island of Hawai‘i	2010-01-19	Apparently normal	tentacle	epidermis	Gram Negative	bacilli	218.17	15	6.87546
21404-6A	Pocillopora meandrina	Island of Hawai‘i	2010-01-19	Apparently normal	tentacle	epidermis	Gram Negative	bacilli	218.17	15	6.87546
21404-6A	Pocillopora meandrina	Island of Hawai‘i	2010-01-19	Apparently normal	tentacle	epidermis	Gram Negative	bacilli	218.17	15	6.87546
21404-6A	Pocillopora meandrina	Island of Hawai‘i	2010-01-19	Apparently normal	tentacle	epidermis	Gram Negative	bacilli	218.17	15	6.87546
21404-6A	Pocillopora meandrina	Island of Hawai‘i	2010-01-19	Apparently normal	tentacle	epidermis	Gram Negative	bacilli	218.17	15	6.87546
21404-6A	Pocillopora meandrina	Island of Hawai‘i	2010-01-19	Apparently normal	tentacle	epidermis	Gram Negative	bacilli	218.17	15	6.87546
21404-6A	Pocillopora meandrina	Island of Hawai‘i	2010-01-19	Apparently normal	tentacle	epidermis	Gram Negative	bacilli	218.17	15	6.87546
21404-6A	Pocillopora meandrina	Island of Hawai‘i	2010-01-19	Apparently normal	tentacle	epidermis	Gram Negative	undetermined	218.17	15	6.87546
21404-6A	Pocillopora meandrina	Island of Hawai‘i	2010-01-19	Apparently normal	tentacle	epidermis	Gram Negative	undetermined	218.17	15	6.87546
21404-6A	Pocillopora meandrina	Island of Hawai‘i	2010-01-19	Apparently normal	mesentery	mesoglea	Gram Positive	bacilli	218.17	15	6.87546
21404-6A	Pocillopora meandrina	Island of Hawai‘i	2010-01-19	Apparently normal	tentacle	epidermis	Gram Negative	bacilli	218.17	15	6.87546
21404-6A	Pocillopora meandrina	Island of Hawai‘i	2010-01-19	Apparently normal	tentacle	epidermis	Gram Negative	bacilli	218.17	15	6.87546
21404-6A	Pocillopora meandrina	Island of Hawai‘i	2010-01-19	Apparently normal	tentacle	epidermis	Gram Positive	bacilli	218.17	15	6.87546
21404-6A	Pocillopora meandrina	Island of Hawai‘i	2010-01-19	Apparently normal	tentacle	epidermis	Gram Negative	bacilli	218.17	15	6.87546
21506-11A	Porites lobata	Island of Hawai‘i	2010-06-29	Tissue loss	coenenchyme	gastrodermis	Gram Negative	cocci	62.82	6	9.55111
21506-11A	Porites lobata	Island of Hawai‘i	2010-06-29	Tissue loss	coenenchyme	gastrodermis	Gram Negative	cocci	62.82	6	9.55111
21506-11A	Porites lobata	Island of Hawai‘i	2010-06-29	Tissue loss	coenenchyme	gastrodermis	Gram Negative	cocci	62.82	6	9.55111
21506-11A	Porites lobata	Island of Hawai‘i	2010-06-29	Tissue loss	coenenchyme	gastrodermis	Gram Negative	cocci	62.82	6	9.55111
21506-11A	Porites lobata	Island of Hawai‘i	2010-06-29	Tissue loss	coenenchyme	gastrodermis	Gram Negative	cocci	62.82	6	9.55111
21506-11A	Porites lobata	Island of Hawai‘i	2010-06-29	Tissue loss	coenenchyme	gastrodermis	Gram Negative	cocci	62.82	6	9.55111
21506-13B	Porites compressa	Island of Hawai‘i	2010-08-23	Tissue loss	tentacle	gastrodermis	Gram Negative	cocci	183.48	56	30.5218
21506-13B	Porites compressa	Island of Hawai‘i	2010-08-23	Tissue loss	tentacle	gastrodermis	Gram Negative	cocci	183.48	56	30.5218
21506-13B	Porites compressa	Island of Hawai‘i	2010-08-23	Tissue loss	coenenchyme	gastrodermis	Gram Negative	cocci	183.48	56	30.5218
21506-13B	Porites compressa	Island of Hawai‘i	2010-08-23	Tissue loss	coenenchyme	gastrodermis	Gram Negative	cocci	183.48	56	30.5218
21506-13B	Porites compressa	Island of Hawai‘i	2010-08-23	Tissue loss	coenenchyme	gastrodermis	Gram Negative	cocci	183.48	56	30.5218
21506-13B	Porites compressa	Island of Hawai‘i	2010-08-23	Tissue loss	coenenchyme	gastrodermis	Gram Negative	cocci	183.48	56	30.5218
21506-13B	Porites compressa	Island of Hawai‘i	2010-08-23	Tissue loss	coenenchyme	gastrodermis	Gram Negative	cocci	183.48	56	30.5218
21506-13B	Porites compressa	Island of Hawai‘i	2010-08-23	Tissue loss	coenenchyme	gastrodermis	Gram Negative	cocci	183.48	56	30.5218
21506-13B	Porites compressa	Island of Hawai‘i	2010-08-23	Tissue loss	coenenchyme	gastrodermis	Gram Negative	cocci	183.48	56	30.5218
21506-13B	Porites compressa	Island of Hawai‘i	2010-08-23	Tissue loss	coenenchyme	gastrodermis	Gram Negative	cocci	183.48	56	30.5218
21506-13B	Porites compressa	Island of Hawai‘i	2010-08-23	Tissue loss	coenenchyme	gastrodermis	Gram Negative	cocci	183.48	56	30.5218
21506-13B	Porites compressa	Island of Hawai‘i	2010-08-23	Tissue loss	coenenchyme	gastrodermis	Gram Negative	cocci	183.48	56	30.5218
21506-13B	Porites compressa	Island of Hawai‘i	2010-08-23	Tissue loss	coenenchyme	gastrodermis	Gram Negative	cocci	183.48	56	30.5218
21506-13B	Porites compressa	Island of Hawai‘i	2010-08-23	Tissue loss	coenenchyme	gastrodermis	Gram Negative	cocci	183.48	56	30.5218
21506-13B	Porites compressa	Island of Hawai‘i	2010-08-23	Tissue loss	coenenchyme	gastrodermis	Gram Negative	cocci	183.48	56	30.5218
21506-13B	Porites compressa	Island of Hawai‘i	2010-08-23	Tissue loss	coenenchyme	gastrodermis	Gram Negative	cocci	183.48	56	30.5218
21506-13B	Porites compressa	Island of Hawai‘i	2010-08-23	Tissue loss	coenenchyme	gastrodermis	Gram Negative	cocci	183.48	56	30.5218
21506-13B	Porites compressa	Island of Hawai‘i	2010-08-23	Tissue loss	coenenchyme	gastrodermis	Gram Negative	cocci	183.48	56	30.5218
21506-13B	Porites compressa	Island of Hawai‘i	2010-08-23	Tissue loss	coenenchyme	gastrodermis	Gram Negative	cocci	183.48	56	30.5218
21506-13B	Porites compressa	Island of Hawai‘i	2010-08-23	Tissue loss	coenenchyme	gastrodermis	Gram Negative	cocci	183.48	56	30.5218
21506-13B	Porites compressa	Island of Hawai‘i	2010-08-23	Tissue loss	coenenchyme	gastrodermis	Gram Negative	cocci	183.48	56	30.5218
21506-13B	Porites compressa	Island of Hawai‘i	2010-08-23	Tissue loss	coenenchyme	gastrodermis	Gram Negative	cocci	183.48	56	30.5218
21506-13B	Porites compressa	Island of Hawai‘i	2010-08-23	Tissue loss	coenenchyme	gastrodermis	Gram Negative	cocci	183.48	56	30.5218
21506-13B	Porites compressa	Island of Hawai‘i	2010-08-23	Tissue loss	coenenchyme	gastrodermis	Gram Negative	cocci	183.48	56	30.5218
21506-13B	Porites compressa	Island of Hawai‘i	2010-08-23	Tissue loss	coenenchyme	gastrodermis	Gram Negative	cocci	183.48	56	30.5218
21506-13B	Porites compressa	Island of Hawai‘i	2010-08-23	Tissue loss	coenenchyme	gastrodermis	Gram Negative	cocci	183.48	56	30.5218
21506-13B	Porites compressa	Island of Hawai‘i	2010-08-23	Tissue loss	coenenchyme	gastrodermis	Gram Negative	cocci	183.48	56	30.5218
21506-13B	Porites compressa	Island of Hawai‘i	2010-08-23	Tissue loss	coenenchyme	gastrodermis	Gram Negative	cocci	183.48	56	30.5218
21506-13B	Porites compressa	Island of Hawai‘i	2010-08-23	Tissue loss	coenenchyme	gastrodermis	Gram Negative	cocci	183.48	56	30.5218
21506-13B	Porites compressa	Island of Hawai‘i	2010-08-23	Tissue loss	coenenchyme	gastrodermis	Gram Negative	cocci	183.48	56	30.5218
21506-13B	Porites compressa	Island of Hawai‘i	2010-08-23	Tissue loss	coenenchyme	gastrodermis	Gram Negative	cocci	183.48	56	30.5218
21506-13B	Porites compressa	Island of Hawai‘i	2010-08-23	Tissue loss	coenenchyme	gastrodermis	Gram Negative	cocci	183.48	56	30.5218
21506-13B	Porites compressa	Island of Hawai‘i	2010-08-23	Tissue loss	coenenchyme	gastrodermis	Gram Negative	cocci	183.48	56	30.5218
21506-13B	Porites compressa	Island of Hawai‘i	2010-08-23	Tissue loss	coenenchyme	gastrodermis	Gram Negative	cocci	183.48	56	30.5218
21506-13B	Porites compressa	Island of Hawai‘i	2010-08-23	Tissue loss	coenenchyme	gastrodermis	Gram Negative	cocci	183.48	56	30.5218
21506-13B	Porites compressa	Island of Hawai‘i	2010-08-23	Tissue loss	coenenchyme	gastrodermis	Gram Negative	cocci	183.48	56	30.5218
21506-13B	Porites compressa	Island of Hawai‘i	2010-08-23	Tissue loss	coenenchyme	gastrodermis	Gram Negative	cocci	183.48	56	30.5218
21506-13B	Porites compressa	Island of Hawai‘i	2010-08-23	Tissue loss	coenenchyme	gastrodermis	Gram Negative	cocci	183.48	56	30.5218
21506-13B	Porites compressa	Island of Hawai‘i	2010-08-23	Tissue loss	coenenchyme	gastrodermis	Gram Negative	cocci	183.48	56	30.5218
21506-13B	Porites compressa	Island of Hawai‘i	2010-08-23	Tissue loss	coenenchyme	epidermis	Gram Negative	cocci	183.48	56	30.5218
21506-13B	Porites compressa	Island of Hawai‘i	2010-08-23	Tissue loss	coenenchyme	gastrodermis	Gram Negative	cocci	183.48	56	30.5218
21506-13B	Porites compressa	Island of Hawai‘i	2010-08-23	Tissue loss	coenenchyme	gastrodermis	Gram Negative	cocci	183.48	56	30.5218
21506-13B	Porites compressa	Island of Hawai‘i	2010-08-23	Tissue loss	coenenchyme	gastrodermis	Gram Negative	cocci	183.48	56	30.5218
21506-13B	Porites compressa	Island of Hawai‘i	2010-08-23	Tissue loss	coenenchyme	gastrodermis	Gram Negative	cocci	183.48	56	30.5218
21506-13B	Porites compressa	Island of Hawai‘i	2010-08-23	Tissue loss	coenenchyme	gastrodermis	Gram Negative	cocci	183.48	56	30.5218
21506-13B	Porites compressa	Island of Hawai‘i	2010-08-23	Tissue loss	coenenchyme	gastrodermis	Gram Negative	cocci	183.48	56	30.5218
21506-13B	Porites compressa	Island of Hawai‘i	2010-08-23	Tissue loss	coenenchyme	gastrodermis	Gram Negative	cocci	183.48	56	30.5218
21506-13B	Porites compressa	Island of Hawai‘i	2010-08-23	Tissue loss	coenenchyme	gastrodermis	Gram Negative	cocci	183.48	56	30.5218
21506-13B	Porites compressa	Island of Hawai‘i	2010-08-23	Tissue loss	coenenchyme	gastrodermis	Gram Negative	cocci	183.48	56	30.5218
21506-13B	Porites compressa	Island of Hawai‘i	2010-08-23	Tissue loss	coenenchyme	gastrodermis	Gram Negative	cocci	183.48	56	30.5218
21506-13B	Porites compressa	Island of Hawai‘i	2010-08-23	Tissue loss	coenenchyme	gastrodermis	Gram Negative	cocci	183.48	56	30.5218
21506-13B	Porites compressa	Island of Hawai‘i	2010-08-23	Tissue loss	coenenchyme	gastrodermis	Gram Negative	cocci	183.48	56	30.5218
21506-13B	Porites compressa	Island of Hawai‘i	2010-08-23	Tissue loss	coenenchyme	gastrodermis	Gram Negative	cocci	183.48	56	30.5218
21506-13B	Porites compressa	Island of Hawai‘i	2010-08-23	Tissue loss	coenenchyme	gastrodermis	Gram Negative	cocci	183.48	56	30.5218
21506-13B	Porites compressa	Island of Hawai‘i	2010-08-23	Tissue loss	coenenchyme	gastrodermis	Gram Negative	cocci	183.48	56	30.5218
21506-13B	Porites compressa	Island of Hawai‘i	2010-08-23	Tissue loss	coenenchyme	gastrodermis	Gram Negative	cocci	183.48	56	30.5218
21506-5A	Porites compressa	Island of Hawai‘i	2009-03-10	Tissue loss	tentacle	gastrodermis	Gram Negative	cocci	239.16	32	13.3804
21506-5A	Porites compressa	Island of Hawai‘i	2009-03-10	Tissue loss	tentacle	gastrodermis	Gram Negative	cocci	239.16	32	13.3804
21506-5A	Porites compressa	Island of Hawai‘i	2009-03-10	Tissue loss	coenenchyme	gastrodermis	Gram Negative	cocci	239.16	32	13.3804
21506-5A	Porites compressa	Island of Hawai‘i	2009-03-10	Tissue loss	coenenchyme	gastrodermis	Gram Negative	cocci	239.16	32	13.3804
21506-5A	Porites compressa	Island of Hawai‘i	2009-03-10	Tissue loss	tentacle	gastrodermis	Gram Negative	cocci	239.16	32	13.3804
21506-5A	Porites compressa	Island of Hawai‘i	2009-03-10	Tissue loss	tentacle	gastrodermis	Gram Negative	cocci	239.16	32	13.3804
21506-5A	Porites compressa	Island of Hawai‘i	2009-03-10	Tissue loss	tentacle	gastrodermis	Gram Negative	cocci	239.16	32	13.3804
21506-5A	Porites compressa	Island of Hawai‘i	2009-03-10	Tissue loss	coenenchyme	gastrodermis	Gram Negative	cocci	239.16	32	13.3804
21506-5A	Porites compressa	Island of Hawai‘i	2009-03-10	Tissue loss	coenenchyme	gastrodermis	Gram Negative	cocci	239.16	32	13.3804
21506-5A	Porites compressa	Island of Hawai‘i	2009-03-10	Tissue loss	coenenchyme	gastrodermis	Gram Negative	cocci	239.16	32	13.3804
21506-5A	Porites compressa	Island of Hawai‘i	2009-03-10	Tissue loss	tentacle	gastrodermis	Gram Negative	cocci	239.16	32	13.3804
21506-5A	Porites compressa	Island of Hawai‘i	2009-03-10	Tissue loss	tentacle	gastrodermis	Gram Negative	cocci	239.16	32	13.3804
21506-5A	Porites compressa	Island of Hawai‘i	2009-03-10	Tissue loss	tentacle	gastrodermis	Gram Negative	cocci	239.16	32	13.3804
21506-5A	Porites compressa	Island of Hawai‘i	2009-03-10	Tissue loss	tentacle	gastrodermis	Gram Negative	cocci	239.16	32	13.3804
21506-5A	Porites compressa	Island of Hawai‘i	2009-03-10	Tissue loss	tentacle	gastrodermis	Gram Negative	cocci	239.16	32	13.3804
21506-5A	Porites compressa	Island of Hawai‘i	2009-03-10	Tissue loss	coenenchyme	gastrodermis	Gram Negative	cocci	239.16	32	13.3804
21506-5A	Porites compressa	Island of Hawai‘i	2009-03-10	Tissue loss	tentacle	gastrodermis	Gram Negative	cocci	239.16	32	13.3804
21506-5A	Porites compressa	Island of Hawai‘i	2009-03-10	Tissue loss	tentacle	gastrodermis	Gram Negative	cocci	239.16	32	13.3804
21506-5A	Porites compressa	Island of Hawai‘i	2009-03-10	Tissue loss	tentacle	gastrodermis	Gram Negative	cocci	239.16	32	13.3804
21506-5A	Porites compressa	Island of Hawai‘i	2009-03-10	Tissue loss	coenenchyme	gastrodermis	Gram Negative	cocci	239.16	32	13.3804
21506-5A	Porites compressa	Island of Hawai‘i	2009-03-10	Tissue loss	tentacle	gastrodermis	Gram Negative	cocci	239.16	32	13.3804
21506-5A	Porites compressa	Island of Hawai‘i	2009-03-10	Tissue loss	tentacle	gastrodermis	Gram Negative	cocci	239.16	32	13.3804
21506-5A	Porites compressa	Island of Hawai‘i	2009-03-10	Tissue loss	tentacle	gastrodermis	Gram Negative	cocci	239.16	32	13.3804
21506-5A	Porites compressa	Island of Hawai‘i	2009-03-10	Tissue loss	coenenchyme	gastrodermis	Gram Negative	cocci	239.16	32	13.3804
21506-5A	Porites compressa	Island of Hawai‘i	2009-03-10	Tissue loss	coenenchyme	gastrodermis	Gram Negative	cocci	239.16	32	13.3804
21506-5A	Porites compressa	Island of Hawai‘i	2009-03-10	Tissue loss	tentacle	gastrodermis	Gram Negative	cocci	239.16	32	13.3804
21506-5A	Porites compressa	Island of Hawai‘i	2009-03-10	Tissue loss	coenenchyme	gastrodermis	Gram Positive	undetermined	239.16	32	13.3804
21506-5A	Porites compressa	Island of Hawai‘i	2009-03-10	Tissue loss	coenenchyme	gastrodermis	Gram Positive	undetermined	239.16	32	13.3804
21506-5A	Porites compressa	Island of Hawai‘i	2009-03-10	Tissue loss	coenenchyme	gastrodermis	Gram Positive	undetermined	239.16	32	13.3804
21506-5A	Porites compressa	Island of Hawai‘i	2009-03-10	Tissue loss	coenenchyme	gastrodermis	Gram Negative	cocci	239.16	32	13.3804
21506-5A	Porites compressa	Island of Hawai‘i	2009-03-10	Tissue loss	coenenchyme	gastrodermis	Gram Negative	cocci	239.16	32	13.3804
21506-5A	Porites compressa	Island of Hawai‘i	2009-03-10	Tissue loss	coenenchyme	gastrodermis	Gram Negative	cocci	239.16	32	13.3804
21506-7A	Porites compressa	Island of Hawai‘i	2010-03-15	Tissue loss	coenenchyme	gastrodermis	Gram Negative	cocci	156.53	38	24.2758
21506-7A	Porites compressa	Island of Hawai‘i	2010-03-15	Tissue loss	coenenchyme	gastrodermis	Gram Negative	cocci	156.53	38	24.2758
21506-7A	Porites compressa	Island of Hawai‘i	2010-03-15	Tissue loss	coenenchyme	gastrodermis	Gram Negative	cocci	156.53	38	24.2758
21506-7A	Porites compressa	Island of Hawai‘i	2010-03-15	Tissue loss	coenenchyme	gastrodermis	Gram Negative	cocci	156.53	38	24.2758
21506-7A	Porites compressa	Island of Hawai‘i	2010-03-15	Tissue loss	coenenchyme	gastrodermis	Gram Negative	cocci	156.53	38	24.2758
21506-7A	Porites compressa	Island of Hawai‘i	2010-03-15	Tissue loss	coenenchyme	gastrodermis	Gram Negative	cocci	156.53	38	24.2758
21506-7A	Porites compressa	Island of Hawai‘i	2010-03-15	Tissue loss	coenenchyme	gastrodermis	Gram Negative	cocci	156.53	38	24.2758
21506-7A	Porites compressa	Island of Hawai‘i	2010-03-15	Tissue loss	coenenchyme	gastrodermis	Gram Negative	cocci	156.53	38	24.2758
21506-7A	Porites compressa	Island of Hawai‘i	2010-03-15	Tissue loss	coenenchyme	gastrodermis	Gram Negative	cocci	156.53	38	24.2758
21506-7A	Porites compressa	Island of Hawai‘i	2010-03-15	Tissue loss	coenenchyme	gastrodermis	Gram Negative	cocci	156.53	38	24.2758
21506-7A	Porites compressa	Island of Hawai‘i	2010-03-15	Tissue loss	coenenchyme	gastrodermis	Gram Negative	cocci	156.53	38	24.2758
21506-7A	Porites compressa	Island of Hawai‘i	2010-03-15	Tissue loss	coenenchyme	gastrodermis	Gram Negative	cocci	156.53	38	24.2758
21506-7A	Porites compressa	Island of Hawai‘i	2010-03-15	Tissue loss	coenenchyme	gastrodermis	Gram Negative	cocci	156.53	38	24.2758
21506-7A	Porites compressa	Island of Hawai‘i	2010-03-15	Tissue loss	coenenchyme	gastrodermis	Gram Negative	cocci	156.53	38	24.2758
21506-7A	Porites compressa	Island of Hawai‘i	2010-03-15	Tissue loss	coenenchyme	gastrodermis	Gram Negative	cocci	156.53	38	24.2758
21506-7A	Porites compressa	Island of Hawai‘i	2010-03-15	Tissue loss	coenenchyme	gastrodermis	Gram Negative	cocci	156.53	38	24.2758
21506-7A	Porites compressa	Island of Hawai‘i	2010-03-15	Tissue loss	coenenchyme	gastrodermis	Gram Negative	cocci	156.53	38	24.2758
21506-7A	Porites compressa	Island of Hawai‘i	2010-03-15	Tissue loss	coenenchyme	gastrodermis	Gram Positive	bacilli	156.53	38	24.2758
21506-7A	Porites compressa	Island of Hawai‘i	2010-03-15	Tissue loss	coenenchyme	gastrodermis	Gram Positive	undetermined	156.53	38	24.2758
21506-7A	Porites compressa	Island of Hawai‘i	2010-03-15	Tissue loss	coenenchyme	gastrodermis	Gram Positive	undetermined	156.53	38	24.2758
21506-7A	Porites compressa	Island of Hawai‘i	2010-03-15	Tissue loss	coenenchyme	gastrodermis	Gram Negative	cocci	156.53	38	24.2758
21506-7A	Porites compressa	Island of Hawai‘i	2010-03-15	Tissue loss	coenenchyme	gastrodermis	Gram Negative	cocci	156.53	38	24.2758
21506-7A	Porites compressa	Island of Hawai‘i	2010-03-15	Tissue loss	coenenchyme	gastrodermis	Gram Negative	cocci	156.53	38	24.2758
21506-7A	Porites compressa	Island of Hawai‘i	2010-03-15	Tissue loss	coenenchyme	gastrodermis	Gram Negative	cocci	156.53	38	24.2758
21506-7A	Porites compressa	Island of Hawai‘i	2010-03-15	Tissue loss	coenenchyme	gastrodermis	Gram Negative	cocci	156.53	38	24.2758
21506-7A	Porites compressa	Island of Hawai‘i	2010-03-15	Tissue loss	coenenchyme	gastrodermis	Gram Negative	cocci	156.53	38	24.2758
21506-7A	Porites compressa	Island of Hawai‘i	2010-03-15	Tissue loss	coenenchyme	gastrodermis	Gram Negative	cocci	156.53	38	24.2758
21506-7A	Porites compressa	Island of Hawai‘i	2010-03-15	Tissue loss	coenenchyme	gastrodermis	Gram Negative	cocci	156.53	38	24.2758
21506-7A	Porites compressa	Island of Hawai‘i	2010-03-15	Tissue loss	coenenchyme	gastrodermis	Gram Positive	bacilli	156.53	38	24.2758
21506-7A	Porites compressa	Island of Hawai‘i	2010-03-15	Tissue loss	coenenchyme	gastrodermis	Gram Positive	undetermined	156.53	38	24.2758
21506-7A	Porites compressa	Island of Hawai‘i	2010-03-15	Tissue loss	coenenchyme	gastrodermis	Gram Negative	cocci	156.53	38	24.2758
21506-7A	Porites compressa	Island of Hawai‘i	2010-03-15	Tissue loss	coenenchyme	gastrodermis	Gram Positive	bacilli	156.53	38	24.2758
21506-7A	Porites compressa	Island of Hawai‘i	2010-03-15	Tissue loss	coenenchyme	gastrodermis	Gram Positive	bacilli	156.53	38	24.2758
21506-7A	Porites compressa	Island of Hawai‘i	2010-03-15	Tissue loss	coenenchyme	gastrodermis	Gram Positive	undetermined	156.53	38	24.2758
21506-7A	Porites compressa	Island of Hawai‘i	2010-03-15	Tissue loss	coenenchyme	gastrodermis	Gram Positive	undetermined	156.53	38	24.2758
21506-7A	Porites compressa	Island of Hawai‘i	2010-03-15	Tissue loss	coenenchyme	gastrodermis	Gram Positive	bacilli	156.53	38	24.2758
21506-7A	Porites compressa	Island of Hawai‘i	2010-03-15	Tissue loss	coenenchyme	gastrodermis	Gram Positive	undetermined	156.53	38	24.2758
21506-7A	Porites compressa	Island of Hawai‘i	2010-03-15	Tissue loss	coenenchyme	gastrodermis	Gram Negative	cocci	156.53	38	24.2758
21602-11A	Acropora cytherea	Palmyra Atoll	2011-05-21	Tissue loss	tentacle	gastrodermis	Gram Negative	bacilli	113.29	3	2.64816
21602-11A	Acropora cytherea	Palmyra Atoll	2011-05-21	Tissue loss	coenenchyme	gastrodermis	Gram Negative	bacilli	113.29	3	2.64816
21602-11A	Acropora cytherea	Palmyra Atoll	2011-05-21	Tissue loss	coenenchyme	gastrodermis	Gram Negative	bacilli	113.29	3	2.64816
21602-16A	Acropora cytherea	Palmyra Atoll	2011-05-20	Apparently normal	coenenchyme	gastrodermis	Gram Negative	bacilli	153.65	4	2.60336
21602-16A	Acropora cytherea	Palmyra Atoll	2011-05-20	Apparently normal	coenenchyme	gastrodermis	Gram Positive	bacilli	153.65	4	2.60336
21602-16A	Acropora cytherea	Palmyra Atoll	2011-05-20	Apparently normal	tentacle	epidermis	Gram Positive	bacilli	153.65	4	2.60336
21602-16A	Acropora cytherea	Palmyra Atoll	2011-05-20	Apparently normal	tentacle	epidermis	Gram Positive	bacilli	153.65	4	2.60336
21602-6A	Acropora cytherea	Palmyra Atoll	2011-05-20	Apparently normal	tentacle	epidermis	Gram Negative	cocci	95.36	6	6.292
21602-6A	Acropora cytherea	Palmyra Atoll	2011-05-20	Apparently normal	coenenchyme	gastrodermis	Gram Negative	bacilli	95.36	6	6.292
21602-6A	Acropora cytherea	Palmyra Atoll	2011-05-20	Apparently normal	tentacle	gastrodermis	Gram Negative	bacilli	95.36	6	6.292
21602-6A	Acropora cytherea	Palmyra Atoll	2011-05-20	Apparently normal	coenenchyme	mesoglea	Gram Positive	bacilli	95.36	6	6.292
21602-6A	Acropora cytherea	Palmyra Atoll	2011-05-20	Apparently normal	coenenchyme	gastrodermis	Gram Negative	bacilli	95.36	6	6.292
21602-6A	Acropora cytherea	Palmyra Atoll	2011-05-20	Apparently normal	skeleton		Gram Positive	bacilli	95.36	6	6.292
21602-7A	Acropora cytherea	Palmyra Atoll	2011-05-20	Tissue loss	coenenchyme	gastrodermis	Gram Negative	bacilli	196.34	15	7.63999
21602-7A	Acropora cytherea	Palmyra Atoll	2011-05-20	Tissue loss	coenenchyme	gastrodermis	Gram Positive	bacilli	196.34	15	7.63999
21602-7A	Acropora cytherea	Palmyra Atoll	2011-05-20	Tissue loss	coenenchyme	gastrodermis	Gram Negative	bacilli	196.34	15	7.63999
21602-7A	Acropora cytherea	Palmyra Atoll	2011-05-20	Tissue loss	coenenchyme	gastrodermis	Gram Negative	bacilli	196.34	15	7.63999
21602-7A	Acropora cytherea	Palmyra Atoll	2011-05-20	Tissue loss	coenenchyme	gastrodermis	Gram Negative	bacilli	196.34	15	7.63999
21602-7A	Acropora cytherea	Palmyra Atoll	2011-05-20	Tissue loss	coenenchyme	mesoglea	Gram Positive	bacilli	196.34	15	7.63999
21602-7A	Acropora cytherea	Palmyra Atoll	2011-05-20	Tissue loss	coenenchyme	gastrodermis	Gram Negative	bacilli	196.34	15	7.63999
21602-7A	Acropora cytherea	Palmyra Atoll	2011-05-20	Tissue loss	coenenchyme	mesoglea	Gram Negative	bacilli	196.34	15	7.63999
21602-7A	Acropora cytherea	Palmyra Atoll	2011-05-20	Tissue loss	coenenchyme	mesoglea	Gram Negative	bacilli	196.34	15	7.63999
21602-7A	Acropora cytherea	Palmyra Atoll	2011-05-20	Tissue loss	coenenchyme	mesoglea	Gram Negative	bacilli	196.34	15	7.63999
21602-7A	Acropora cytherea	Palmyra Atoll	2011-05-20	Tissue loss	skeleton		Gram Positive	bacilli	196.34	15	7.63999
21602-7A	Acropora cytherea	Palmyra Atoll	2011-05-20	Tissue loss	coenenchyme	mesoglea	Gram Negative	bacilli	196.34	15	7.63999
21602-7A	Acropora cytherea	Palmyra Atoll	2011-05-20	Tissue loss	coenenchyme	calicodermis	Gram Positive	bacilli	196.34	15	7.63999
21602-7A	Acropora cytherea	Palmyra Atoll	2011-05-20	Tissue loss	coenenchyme	gastrodermis	Gram Negative	bacilli	196.34	15	7.63999
21602-7A	Acropora cytherea	Palmyra Atoll	2011-05-20	Tissue loss	coenenchyme	gastrodermis	Gram Negative	bacilli	196.34	15	7.63999
21602-7B	Acropora cytherea	Palmyra Atoll	2011-05-20	Tissue loss	coenenchyme	gastrodermis	Gram Positive	bacilli	192.07	8	4.16521
21602-7B	Acropora cytherea	Palmyra Atoll	2011-05-20	Tissue loss	coenenchyme	gastrodermis	Gram Positive	bacilli	192.07	8	4.16521
21602-7B	Acropora cytherea	Palmyra Atoll	2011-05-20	Tissue loss	coenenchyme	mesoglea	Gram Positive	bacilli	192.07	8	4.16521
21602-7B	Acropora cytherea	Palmyra Atoll	2011-05-20	Tissue loss	coenenchyme	mesoglea	Gram Negative	bacilli	192.07	8	4.16521
21602-7B	Acropora cytherea	Palmyra Atoll	2011-05-20	Tissue loss	coenenchyme	gastrodermis	Gram Positive	bacilli	192.07	8	4.16521
21602-7B	Acropora cytherea	Palmyra Atoll	2011-05-20	Tissue loss	coenenchyme	gastrodermis	Gram Negative	bacilli	192.07	8	4.16521
21602-7B	Acropora cytherea	Palmyra Atoll	2011-05-20	Tissue loss	coenenchyme	gastrodermis	Gram Negative	bacilli	192.07	8	4.16521
21602-7B	Acropora cytherea	Palmyra Atoll	2011-05-20	Tissue loss	coenenchyme	gastrodermis	Gram Negative	bacilli	192.07	8	4.16521
21612-1A	Porites compressa	O‘ahu	2011-05-12	Discoloration	tentacle	gastrodermis	Gram Negative	cocci	203.66	3	1.47303
21612-1A	Porites compressa	O‘ahu	2011-05-12	Discoloration	tentacle	gastrodermis	Gram Negative	cocci	203.66	3	1.47303
21612-1A	Porites compressa	O‘ahu	2011-05-12	Discoloration	tentacle	gastrodermis	Gram Negative	cocci	203.66	3	1.47303
21612-8A	Porites compressa	O‘ahu	2011-05-12	Bleaching	tentacle	gastrodermis	Gram Negative	cocci	138.37	25	18.067
21612-8A	Porites compressa	O‘ahu	2011-05-12	Bleaching	tentacle	gastrodermis	Gram Negative	cocci	138.37	25	18.067
21612-8A	Porites compressa	O‘ahu	2011-05-12	Bleaching	tentacle	gastrodermis	Gram Negative	cocci	138.37	25	18.067
21612-8A	Porites compressa	O‘ahu	2011-05-12	Bleaching	tentacle	gastrodermis	Gram Negative	cocci	138.37	25	18.067
21612-8A	Porites compressa	O‘ahu	2011-05-12	Bleaching	tentacle	gastrodermis	Gram Negative	cocci	138.37	25	18.067
21612-8A	Porites compressa	O‘ahu	2011-05-12	Bleaching	coenenchyme	gastrodermis	Gram Negative	cocci	138.37	25	18.067
21612-8A	Porites compressa	O‘ahu	2011-05-12	Bleaching	coenenchyme	gastrodermis	Gram Negative	cocci	138.37	25	18.067
21612-8A	Porites compressa	O‘ahu	2011-05-12	Bleaching	coenenchyme	gastrodermis	Gram Negative	cocci	138.37	25	18.067
21612-8A	Porites compressa	O‘ahu	2011-05-12	Bleaching	tentacle	gastrodermis	Gram Negative	cocci	138.37	25	18.067
21612-8A	Porites compressa	O‘ahu	2011-05-12	Bleaching	tentacle	gastrodermis	Gram Negative	cocci	138.37	25	18.067
21612-8A	Porites compressa	O‘ahu	2011-05-12	Bleaching	tentacle	gastrodermis	Gram Negative	cocci	138.37	25	18.067
21612-8A	Porites compressa	O‘ahu	2011-05-12	Bleaching	tentacle	gastrodermis	Gram Negative	cocci	138.37	25	18.067
21612-8A	Porites compressa	O‘ahu	2011-05-12	Bleaching	tentacle	gastrodermis	Gram Negative	cocci	138.37	25	18.067
21612-8A	Porites compressa	O‘ahu	2011-05-12	Bleaching	tentacle	gastrodermis	Gram Negative	cocci	138.37	25	18.067
21612-8A	Porites compressa	O‘ahu	2011-05-12	Bleaching	tentacle	gastrodermis	Gram Negative	cocci	138.37	25	18.067
21612-8A	Porites compressa	O‘ahu	2011-05-12	Bleaching	coenenchyme	gastrodermis	Gram Negative	cocci	138.37	25	18.067
21612-8A	Porites compressa	O‘ahu	2011-05-12	Bleaching	tentacle	gastrodermis	Gram Negative	cocci	138.37	25	18.067
21612-8A	Porites compressa	O‘ahu	2011-05-12	Bleaching	tentacle	gastrodermis	Gram Negative	cocci	138.37	25	18.067
21612-8A	Porites compressa	O‘ahu	2011-05-12	Bleaching	tentacle	gastrodermis	Gram Negative	cocci	138.37	25	18.067
21612-8A	Porites compressa	O‘ahu	2011-05-12	Bleaching	tentacle	gastrodermis	Gram Negative	cocci	138.37	25	18.067
21612-8A	Porites compressa	O‘ahu	2011-05-12	Bleaching	tentacle	gastrodermis	Gram Negative	cocci	138.37	25	18.067
21612-8A	Porites compressa	O‘ahu	2011-05-12	Bleaching	tentacle	gastrodermis	Gram Negative	cocci	138.37	25	18.067
21612-8A	Porites compressa	O‘ahu	2011-05-12	Bleaching	tentacle	gastrodermis	Gram Negative	cocci	138.37	25	18.067
21612-8A	Porites compressa	O‘ahu	2011-05-12	Bleaching	tentacle	gastrodermis	Gram Negative	cocci	138.37	25	18.067
21612-8A	Porites compressa	O‘ahu	2011-05-12	Bleaching	tentacle	gastrodermis	Gram Negative	cocci	138.37	25	18.067
21956-01A	Porites evermanni	O‘ahu	2013-08-06	Discoloration	coenenchyme	gastrodermis	Gram Negative	cocci	252.71	10	3.95709
21956-01A	Porites evermanni	O‘ahu	2013-08-06	Discoloration	coenenchyme	gastrodermis	Gram Negative	cocci	252.71	10	3.95709
21956-01A	Porites evermanni	O‘ahu	2013-08-06	Discoloration	coenenchyme	gastrodermis	Gram Negative	cocci	252.71	10	3.95709
21956-01A	Porites evermanni	O‘ahu	2013-08-06	Discoloration	coenenchyme	gastrodermis	Gram Negative	cocci	252.71	10	3.95709
21956-01A	Porites evermanni	O‘ahu	2013-08-06	Discoloration	coenenchyme	gastrodermis	Gram Negative	cocci	252.71	10	3.95709
21956-01A	Porites evermanni	O‘ahu	2013-08-06	Discoloration	tentacle	gastrodermis	Gram Negative	cocci	252.71	10	3.95709
21956-01A	Porites evermanni	O‘ahu	2013-08-06	Discoloration	tentacle	gastrodermis	Gram Negative	cocci	252.71	10	3.95709
21956-01A	Porites evermanni	O‘ahu	2013-08-06	Discoloration	tentacle	gastrodermis	Gram Negative	cocci	252.71	10	3.95709
21956-01A	Porites evermanni	O‘ahu	2013-08-06	Discoloration	coenenchyme	gastrodermis	Gram Negative	cocci	252.71	10	3.95709
21956-01A	Porites evermanni	O‘ahu	2013-08-06	Discoloration	tentacle	gastrodermis	Gram Negative	cocci	252.71	10	3.95709
25156-20A	Porites compressa	O‘ahu	2015-02-05	Bleaching	tentacle	gastrodermis	Gram Negative	cocci	102.11	15	14.6904
25156-20A	Porites compressa	O‘ahu	2015-02-05	Bleaching	tentacle	gastrodermis	Gram Negative	cocci	102.11	15	14.6904
25156-20A	Porites compressa	O‘ahu	2015-02-05	Bleaching	tentacle	gastrodermis	Gram Negative	cocci	102.11	15	14.6904
25156-20A	Porites compressa	O‘ahu	2015-02-05	Bleaching	tentacle	gastrodermis	Gram Negative	cocci	102.11	15	14.6904
25156-20A	Porites compressa	O‘ahu	2015-02-05	Bleaching	tentacle	gastrodermis	Gram Negative	cocci	102.11	15	14.6904
25156-20A	Porites compressa	O‘ahu	2015-02-05	Bleaching	tentacle	gastrodermis	Gram Negative	cocci	102.11	15	14.6904
25156-20A	Porites compressa	O‘ahu	2015-02-05	Bleaching	tentacle	gastrodermis	Gram Negative	cocci	102.11	15	14.6904
25156-20A	Porites compressa	O‘ahu	2015-02-05	Bleaching	tentacle	gastrodermis	Gram Negative	cocci	102.11	15	14.6904
25156-20A	Porites compressa	O‘ahu	2015-02-05	Bleaching	tentacle	gastrodermis	Gram Negative	cocci	102.11	15	14.6904
25156-20A	Porites compressa	O‘ahu	2015-02-05	Bleaching	tentacle	gastrodermis	Gram Negative	cocci	102.11	15	14.6904
25156-20A	Porites compressa	O‘ahu	2015-02-05	Bleaching	tentacle	gastrodermis	Gram Negative	cocci	102.11	15	14.6904
25156-20A	Porites compressa	O‘ahu	2015-02-05	Bleaching	tentacle	gastrodermis	Gram Negative	cocci	102.11	15	14.6904
25156-20A	Porites compressa	O‘ahu	2015-02-05	Bleaching	tentacle	gastrodermis	Gram Negative	cocci	102.11	15	14.6904
25156-20A	Porites compressa	O‘ahu	2015-02-05	Bleaching	tentacle	gastrodermis	Gram Positive	cocci	102.11	15	14.6904
25156-20A	Porites compressa	O‘ahu	2015-02-05	Bleaching	tentacle	gastrodermis	Gram Negative	cocci	102.11	15	14.6904
25156-21A	Porites compressa	O‘ahu	2015-02-05	Bleaching	tentacle	gastrodermis	Gram Positive	bacilli	171.81	4	2.32817
25156-21A	Porites compressa	O‘ahu	2015-02-05	Bleaching	tentacle	gastrodermis	Gram Positive	bacilli	171.81	4	2.32817
25156-21A	Porites compressa	O‘ahu	2015-02-05	Bleaching	tentacle	gastrodermis	Gram Negative	cocci	171.81	4	2.32817
25156-21A	Porites compressa	O‘ahu	2015-02-05	Bleaching	tentacle	gastrodermis	Gram Negative	bacilli	171.81	4	2.32817
25680-15A	Pocillopora meandrina	Kaua‘i	2019-10-10	Bleaching	tentacle	epidermis	Gram Negative	bacilli	307.2	8	2.60419
25680-15A	Pocillopora meandrina	Kaua‘i	2019-10-10	Bleaching	tentacle	epidermis	Gram Negative	bacilli	307.2	8	2.60419
25680-15A	Pocillopora meandrina	Kaua‘i	2019-10-10	Bleaching	tentacle	epidermis	Gram Negative	bacilli	307.2	8	2.60419
25680-15A	Pocillopora meandrina	Kaua‘i	2019-10-10	Bleaching	tentacle	epidermis	Gram Negative	bacilli	307.2	8	2.60419
25680-15A	Pocillopora meandrina	Kaua‘i	2019-10-10	Bleaching	tentacle	epidermis	Gram Negative	bacilli	307.2	8	2.60419
25680-15A	Pocillopora meandrina	Kaua‘i	2019-10-10	Bleaching	tentacle	epidermis	Gram Negative	bacilli	307.2	8	2.60419
25680-15A	Pocillopora meandrina	Kaua‘i	2019-10-10	Bleaching	tentacle	epidermis	Gram Negative	bacilli	307.2	8	2.60419
25680-15A	Pocillopora meandrina	Kaua‘i	2019-10-10	Bleaching	tentacle	epidermis	Gram Negative	undetermined	307.2	8	2.60419
25680-16A	Pocillopora meandrina	Kaua‘i	2019-10-10	Bleaching	tentacle	epidermis	Gram Negative	bacilli	176.16	2	1.13535
25680-16A	Pocillopora meandrina	Kaua‘i	2019-10-10	Bleaching	tentacle	epidermis	Gram Negative	bacilli	176.16	2	1.13535
25680-17A	Pocillopora meandrina	Kaua‘i	2019-10-10	Tissue loss	tentacle	epidermis	Gram Negative	bacilli	225.72	2	0.886055
25680-17A	Pocillopora meandrina	Kaua‘i	2019-10-10	Tissue loss	tentacle	epidermis	Gram Negative	bacilli	225.72	2	0.886055
25680-18A	Pocillopora meandrina	Kaua‘i	2019-10-10	Tissue loss	tentacle	epidermis	Gram Negative	bacilli	186.22	16	8.59176
25680-18A	Pocillopora meandrina	Kaua‘i	2019-10-10	Tissue loss	tentacle	epidermis	Gram Negative	bacilli	186.22	16	8.59176
25680-18A	Pocillopora meandrina	Kaua‘i	2019-10-10	Tissue loss	tentacle	epidermis	Gram Negative	bacilli	186.22	16	8.59176
25680-18A	Pocillopora meandrina	Kaua‘i	2019-10-10	Tissue loss	tentacle	epidermis	Gram Negative	bacilli	186.22	16	8.59176
25680-18A	Pocillopora meandrina	Kaua‘i	2019-10-10	Tissue loss	tentacle	epidermis	Gram Negative	bacilli	186.22	16	8.59176
25680-18A	Pocillopora meandrina	Kaua‘i	2019-10-10	Tissue loss	tentacle	epidermis	Gram Negative	bacilli	186.22	16	8.59176
25680-18A	Pocillopora meandrina	Kaua‘i	2019-10-10	Tissue loss	tentacle	epidermis	Gram Negative	bacilli	186.22	16	8.59176
25680-18A	Pocillopora meandrina	Kaua‘i	2019-10-10	Tissue loss	tentacle	mesoglea	Gram Negative	bacilli	186.22	16	8.59176
25680-18A	Pocillopora meandrina	Kaua‘i	2019-10-10	Tissue loss	tentacle	epidermis	Gram Negative	bacilli	186.22	16	8.59176
25680-18A	Pocillopora meandrina	Kaua‘i	2019-10-10	Tissue loss	tentacle	epidermis	Gram Negative	bacilli	186.22	16	8.59176
25680-18A	Pocillopora meandrina	Kaua‘i	2019-10-10	Tissue loss	tentacle	epidermis	Gram Negative	bacilli	186.22	16	8.59176
25680-18A	Pocillopora meandrina	Kaua‘i	2019-10-10	Tissue loss	tentacle	epidermis	Gram Negative	bacilli	186.22	16	8.59176
25680-18A	Pocillopora meandrina	Kaua‘i	2019-10-10	Tissue loss	tentacle	epidermis	Gram Negative	bacilli	186.22	16	8.59176
25680-18A	Pocillopora meandrina	Kaua‘i	2019-10-10	Tissue loss	tentacle	epidermis	Gram Negative	bacilli	186.22	16	8.59176
25680-18A	Pocillopora meandrina	Kaua‘i	2019-10-10	Tissue loss	tentacle	epidermis	Gram Negative	bacilli	186.22	16	8.59176
25680-18A	Pocillopora meandrina	Kaua‘i	2019-10-10	Tissue loss	tentacle	epidermis	Gram Negative	bacilli	186.22	16	8.59176
25680-20A	Pocillopora meandrina	Kaua‘i	2019-10-10	Tissue loss	tentacle	epidermis	Gram Negative	bacilli	236.46	15	6.34349
25680-20A	Pocillopora meandrina	Kaua‘i	2019-10-10	Tissue loss	tentacle	epidermis	Gram Negative	bacilli	236.46	15	6.34349
25680-20A	Pocillopora meandrina	Kaua‘i	2019-10-10	Tissue loss	tentacle	epidermis	Gram Negative	bacilli	236.46	15	6.34349
25680-20A	Pocillopora meandrina	Kaua‘i	2019-10-10	Tissue loss	tentacle	epidermis	Gram Negative	bacilli	236.46	15	6.34349
25680-20A	Pocillopora meandrina	Kaua‘i	2019-10-10	Tissue loss	tentacle	epidermis	Gram Negative	bacilli	236.46	15	6.34349
25680-20A	Pocillopora meandrina	Kaua‘i	2019-10-10	Tissue loss	tentacle	epidermis	Gram Negative	undetermined	236.46	15	6.34349
25680-20A	Pocillopora meandrina	Kaua‘i	2019-10-10	Tissue loss	tentacle	epidermis	Gram Negative	bacilli	236.46	15	6.34349
25680-20A	Pocillopora meandrina	Kaua‘i	2019-10-10	Tissue loss	tentacle	epidermis	Gram Negative	bacilli	236.46	15	6.34349
25680-20A	Pocillopora meandrina	Kaua‘i	2019-10-10	Tissue loss	tentacle	epidermis	Gram Negative	bacilli	236.46	15	6.34349
25680-20A	Pocillopora meandrina	Kaua‘i	2019-10-10	Tissue loss	tentacle	epidermis	Gram Negative	bacilli	236.46	15	6.34349
25680-20A	Pocillopora meandrina	Kaua‘i	2019-10-10	Tissue loss	tentacle	epidermis	Gram Negative	bacilli	236.46	15	6.34349
25680-20A	Pocillopora meandrina	Kaua‘i	2019-10-10	Tissue loss	tentacle	epidermis	Gram Negative	bacilli	236.46	15	6.34349
25680-20A	Pocillopora meandrina	Kaua‘i	2019-10-10	Tissue loss	tentacle	epidermis	Gram Negative	bacilli	236.46	15	6.34349
25680-20A	Pocillopora meandrina	Kaua‘i	2019-10-10	Tissue loss	tentacle	epidermis	Gram Negative	bacilli	236.46	15	6.34349
25680-20A	Pocillopora meandrina	Kaua‘i	2019-10-10	Tissue loss	tentacle	epidermis	Gram Negative	bacilli	236.46	15	6.34349
25680-21A	Pocillopora meandrina	Kaua‘i	2019-10-10	Bleaching	tentacle	epidermis	Gram Negative	bacilli	66.14	34	51.4087
25680-21A	Pocillopora meandrina	Kaua‘i	2019-10-10	Bleaching	tentacle	epidermis	Gram Negative	bacilli	66.14	34	51.4087
25680-21A	Pocillopora meandrina	Kaua‘i	2019-10-10	Bleaching	tentacle	epidermis	Gram Negative	bacilli	66.14	34	51.4087
25680-21A	Pocillopora meandrina	Kaua‘i	2019-10-10	Bleaching	tentacle	epidermis	Gram Negative	bacilli	66.14	34	51.4087
25680-21A	Pocillopora meandrina	Kaua‘i	2019-10-10	Bleaching	tentacle	epidermis	Gram Negative	bacilli	66.14	34	51.4087
25680-21A	Pocillopora meandrina	Kaua‘i	2019-10-10	Bleaching	tentacle	epidermis	Gram Negative	bacilli	66.14	34	51.4087
25680-21A	Pocillopora meandrina	Kaua‘i	2019-10-10	Bleaching	tentacle	epidermis	Gram Negative	bacilli	66.14	34	51.4087
25680-21A	Pocillopora meandrina	Kaua‘i	2019-10-10	Bleaching	mesentery	epidermis	Gram Negative	bacilli	66.14	34	51.4087
25680-21A	Pocillopora meandrina	Kaua‘i	2019-10-10	Bleaching	tentacle	epidermis	Gram Negative	bacilli	66.14	34	51.4087
25680-21A	Pocillopora meandrina	Kaua‘i	2019-10-10	Bleaching	tentacle	epidermis	Gram Negative	bacilli	66.14	34	51.4087
25680-21A	Pocillopora meandrina	Kaua‘i	2019-10-10	Bleaching	mesentery	epidermis	Gram Negative	bacilli	66.14	34	51.4087
25680-21A	Pocillopora meandrina	Kaua‘i	2019-10-10	Bleaching	tentacle	epidermis	Gram Negative	bacilli	66.14	34	51.4087
25680-21A	Pocillopora meandrina	Kaua‘i	2019-10-10	Bleaching	tentacle	epidermis	Gram Negative	bacilli	66.14	34	51.4087
25680-21A	Pocillopora meandrina	Kaua‘i	2019-10-10	Bleaching	tentacle	epidermis	Gram Negative	bacilli	66.14	34	51.4087
25680-21A	Pocillopora meandrina	Kaua‘i	2019-10-10	Bleaching	tentacle	epidermis	Gram Negative	bacilli	66.14	34	51.4087
25680-21A	Pocillopora meandrina	Kaua‘i	2019-10-10	Bleaching	mesentery	epidermis	Gram Negative	bacilli	66.14	34	51.4087
25680-21A	Pocillopora meandrina	Kaua‘i	2019-10-10	Bleaching	tentacle	epidermis	Gram Negative	bacilli	66.14	34	51.4087
25680-21A	Pocillopora meandrina	Kaua‘i	2019-10-10	Bleaching	tentacle	epidermis	Gram Negative	bacilli	66.14	34	51.4087
25680-21A	Pocillopora meandrina	Kaua‘i	2019-10-10	Bleaching	tentacle	epidermis	Gram Negative	bacilli	66.14	34	51.4087
25680-21A	Pocillopora meandrina	Kaua‘i	2019-10-10	Bleaching	tentacle	epidermis	Gram Negative	bacilli	66.14	34	51.4087
25680-21A	Pocillopora meandrina	Kaua‘i	2019-10-10	Bleaching	mesentery	epidermis	Gram Negative	bacilli	66.14	34	51.4087
25680-21A	Pocillopora meandrina	Kaua‘i	2019-10-10	Bleaching	mesentery	mesoglea	Gram Negative	undetermined	66.14	34	51.4087
25680-21A	Pocillopora meandrina	Kaua‘i	2019-10-10	Bleaching	mesentery	epidermis	Gram Negative	bacilli	66.14	34	51.4087
25680-21A	Pocillopora meandrina	Kaua‘i	2019-10-10	Bleaching	tentacle	epidermis	Gram Negative	bacilli	66.14	34	51.4087
25680-21A	Pocillopora meandrina	Kaua‘i	2019-10-10	Bleaching	tentacle	epidermis	Gram Negative	bacilli	66.14	34	51.4087
25680-21A	Pocillopora meandrina	Kaua‘i	2019-10-10	Bleaching	tentacle	epidermis	Gram Negative	bacilli	66.14	34	51.4087
25680-21A	Pocillopora meandrina	Kaua‘i	2019-10-10	Bleaching	tentacle	epidermis	Gram Negative	bacilli	66.14	34	51.4087
25680-21A	Pocillopora meandrina	Kaua‘i	2019-10-10	Bleaching	tentacle	epidermis	Gram Negative	bacilli	66.14	34	51.4087
25680-21A	Pocillopora meandrina	Kaua‘i	2019-10-10	Bleaching	tentacle	epidermis	Gram Positive	bacilli	66.14	34	51.4087
25680-21A	Pocillopora meandrina	Kaua‘i	2019-10-10	Bleaching	tentacle	epidermis	Gram Negative	bacilli	66.14	34	51.4087
25680-21A	Pocillopora meandrina	Kaua‘i	2019-10-10	Bleaching	tentacle	epidermis	Gram Negative	bacilli	66.14	34	51.4087
25680-21A	Pocillopora meandrina	Kaua‘i	2019-10-10	Bleaching	tentacle	epidermis	Gram Negative	bacilli	66.14	34	51.4087
25680-21A	Pocillopora meandrina	Kaua‘i	2019-10-10	Bleaching	tentacle	epidermis	Gram Negative	bacilli	66.14	34	51.4087
25680-21A	Pocillopora meandrina	Kaua‘i	2019-10-10	Bleaching	tentacle	epidermis	Gram Negative	bacilli	66.14	34	51.4087
25680-23A	Pocillopora meandrina	Kaua‘i	2019-10-10	Tissue loss	tentacle	epidermis	Gram Negative	bacilli	186.99	2	1.06957
25680-23A	Pocillopora meandrina	Kaua‘i	2019-10-10	Tissue loss	tentacle	epidermis	Gram Negative	undetermined	186.99	2	1.06957
25680-2A	Pocillopora meandrina	Kaua‘i	2019-10-10	Apparently normal	tentacle	epidermis	Gram Positive	bacilli	279.72	44	15.7302
25680-2A	Pocillopora meandrina	Kaua‘i	2019-10-10	Apparently normal	tentacle	epidermis	Gram Positive	bacilli	279.72	44	15.7302
25680-2A	Pocillopora meandrina	Kaua‘i	2019-10-10	Apparently normal	tentacle	epidermis	Gram Positive	bacilli	279.72	44	15.7302
25680-2A	Pocillopora meandrina	Kaua‘i	2019-10-10	Apparently normal	tentacle	epidermis	Gram Positive	bacilli	279.72	44	15.7302
25680-2A	Pocillopora meandrina	Kaua‘i	2019-10-10	Apparently normal	tentacle	epidermis	Gram Negative	bacilli	279.72	44	15.7302
25680-2A	Pocillopora meandrina	Kaua‘i	2019-10-10	Apparently normal	tentacle	epidermis	Gram Positive	bacilli	279.72	44	15.7302
25680-2A	Pocillopora meandrina	Kaua‘i	2019-10-10	Apparently normal	tentacle	epidermis	Gram Positive	bacilli	279.72	44	15.7302
25680-2A	Pocillopora meandrina	Kaua‘i	2019-10-10	Apparently normal	tentacle	epidermis	Gram Positive	bacilli	279.72	44	15.7302
25680-2A	Pocillopora meandrina	Kaua‘i	2019-10-10	Apparently normal	tentacle	epidermis	Gram Positive	bacilli	279.72	44	15.7302
25680-2A	Pocillopora meandrina	Kaua‘i	2019-10-10	Apparently normal	tentacle	epidermis	Gram Positive	bacilli	279.72	44	15.7302
25680-2A	Pocillopora meandrina	Kaua‘i	2019-10-10	Apparently normal	tentacle	epidermis	Gram Positive	bacilli	279.72	44	15.7302
25680-2A	Pocillopora meandrina	Kaua‘i	2019-10-10	Apparently normal	tentacle	epidermis	Gram Positive	bacilli	279.72	44	15.7302
25680-2A	Pocillopora meandrina	Kaua‘i	2019-10-10	Apparently normal	tentacle	epidermis	Gram Positive	bacilli	279.72	44	15.7302
25680-2A	Pocillopora meandrina	Kaua‘i	2019-10-10	Apparently normal	tentacle	epidermis	Gram Negative	bacilli	279.72	44	15.7302
25680-2A	Pocillopora meandrina	Kaua‘i	2019-10-10	Apparently normal	tentacle	epidermis	Gram Negative	bacilli	279.72	44	15.7302
25680-2A	Pocillopora meandrina	Kaua‘i	2019-10-10	Apparently normal	tentacle	epidermis	Gram Positive	bacilli	279.72	44	15.7302
25680-2A	Pocillopora meandrina	Kaua‘i	2019-10-10	Apparently normal	tentacle	epidermis	Gram Negative	bacilli	279.72	44	15.7302
25680-2A	Pocillopora meandrina	Kaua‘i	2019-10-10	Apparently normal	tentacle	epidermis	Gram Positive	bacilli	279.72	44	15.7302
25680-2A	Pocillopora meandrina	Kaua‘i	2019-10-10	Apparently normal	tentacle	epidermis	Gram Positive	bacilli	279.72	44	15.7302
25680-2A	Pocillopora meandrina	Kaua‘i	2019-10-10	Apparently normal	tentacle	epidermis	Gram Negative	bacilli	279.72	44	15.7302
25680-2A	Pocillopora meandrina	Kaua‘i	2019-10-10	Apparently normal	tentacle	epidermis	Gram Positive	bacilli	279.72	44	15.7302
25680-2A	Pocillopora meandrina	Kaua‘i	2019-10-10	Apparently normal	tentacle	epidermis	Gram Positive	undetermined	279.72	44	15.7302
25680-2A	Pocillopora meandrina	Kaua‘i	2019-10-10	Apparently normal	tentacle	epidermis	Gram Positive	bacilli	279.72	44	15.7302
25680-2A	Pocillopora meandrina	Kaua‘i	2019-10-10	Apparently normal	tentacle	epidermis	Gram Positive	bacilli	279.72	44	15.7302
25680-2A	Pocillopora meandrina	Kaua‘i	2019-10-10	Apparently normal	tentacle	epidermis	Gram Positive	bacilli	279.72	44	15.7302
25680-2A	Pocillopora meandrina	Kaua‘i	2019-10-10	Apparently normal	tentacle	epidermis	Gram Negative	bacilli	279.72	44	15.7302
25680-2A	Pocillopora meandrina	Kaua‘i	2019-10-10	Apparently normal	tentacle	epidermis	Gram Positive	bacilli	279.72	44	15.7302
25680-2A	Pocillopora meandrina	Kaua‘i	2019-10-10	Apparently normal	tentacle	epidermis	Gram Positive	undetermined	279.72	44	15.7302
25680-2A	Pocillopora meandrina	Kaua‘i	2019-10-10	Apparently normal	tentacle	epidermis	Gram Positive	undetermined	279.72	44	15.7302
25680-2A	Pocillopora meandrina	Kaua‘i	2019-10-10	Apparently normal	tentacle	epidermis	Gram Negative	undetermined	279.72	44	15.7302
25680-2A	Pocillopora meandrina	Kaua‘i	2019-10-10	Apparently normal	tentacle	epidermis	Gram Positive	bacilli	279.72	44	15.7302
25680-2A	Pocillopora meandrina	Kaua‘i	2019-10-10	Apparently normal	tentacle	epidermis	Gram Positive	bacilli	279.72	44	15.7302
25680-2A	Pocillopora meandrina	Kaua‘i	2019-10-10	Apparently normal	tentacle	epidermis	Gram Positive	bacilli	279.72	44	15.7302
25680-2A	Pocillopora meandrina	Kaua‘i	2019-10-10	Apparently normal	tentacle	epidermis	Gram Positive	bacilli	279.72	44	15.7302
25680-2A	Pocillopora meandrina	Kaua‘i	2019-10-10	Apparently normal	tentacle	epidermis	Gram Positive	bacilli	279.72	44	15.7302
25680-2A	Pocillopora meandrina	Kaua‘i	2019-10-10	Apparently normal	tentacle	epidermis	Gram Negative	bacilli	279.72	44	15.7302
25680-2A	Pocillopora meandrina	Kaua‘i	2019-10-10	Apparently normal	tentacle	epidermis	Gram Negative	bacilli	279.72	44	15.7302
25680-2A	Pocillopora meandrina	Kaua‘i	2019-10-10	Apparently normal	tentacle	epidermis	Gram Negative	undetermined	279.72	44	15.7302
25680-2A	Pocillopora meandrina	Kaua‘i	2019-10-10	Apparently normal	tentacle	epidermis	Gram Negative	bacilli	279.72	44	15.7302
25680-2A	Pocillopora meandrina	Kaua‘i	2019-10-10	Apparently normal	tentacle	epidermis	Gram Negative	bacilli	279.72	44	15.7302
25680-2A	Pocillopora meandrina	Kaua‘i	2019-10-10	Apparently normal	tentacle	epidermis	Gram Negative	bacilli	279.72	44	15.7302
25680-2A	Pocillopora meandrina	Kaua‘i	2019-10-10	Apparently normal	tentacle	epidermis	Gram Negative	bacilli	279.72	44	15.7302
25680-2A	Pocillopora meandrina	Kaua‘i	2019-10-10	Apparently normal	tentacle	epidermis	Gram Positive	bacilli	279.72	44	15.7302
25680-2A	Pocillopora meandrina	Kaua‘i	2019-10-10	Apparently normal	tentacle	epidermis	Gram Positive	cocci	279.72	44	15.7302
25680-4A	Pocillopora meandrina	Kaua‘i	2019-10-10	Apparently normal	tentacle	epidermis	Gram Negative	bacilli	202.18	31	15.333
25680-4A	Pocillopora meandrina	Kaua‘i	2019-10-10	Apparently normal	tentacle	epidermis	Gram Negative	bacilli	202.18	31	15.333
25680-4A	Pocillopora meandrina	Kaua‘i	2019-10-10	Apparently normal	tentacle	epidermis	Gram Negative	bacilli	202.18	31	15.333
25680-4A	Pocillopora meandrina	Kaua‘i	2019-10-10	Apparently normal	tentacle	epidermis	Gram Negative	bacilli	202.18	31	15.333
25680-4A	Pocillopora meandrina	Kaua‘i	2019-10-10	Apparently normal	tentacle	epidermis	Gram Negative	bacilli	202.18	31	15.333
25680-4A	Pocillopora meandrina	Kaua‘i	2019-10-10	Apparently normal	tentacle	epidermis	Gram Negative	bacilli	202.18	31	15.333
25680-4A	Pocillopora meandrina	Kaua‘i	2019-10-10	Apparently normal	tentacle	epidermis	Gram Negative	bacilli	202.18	31	15.333
25680-4A	Pocillopora meandrina	Kaua‘i	2019-10-10	Apparently normal	tentacle	epidermis	Gram Negative	bacilli	202.18	31	15.333
25680-4A	Pocillopora meandrina	Kaua‘i	2019-10-10	Apparently normal	tentacle	epidermis	Gram Negative	bacilli	202.18	31	15.333
25680-4A	Pocillopora meandrina	Kaua‘i	2019-10-10	Apparently normal	tentacle	epidermis	Gram Negative	bacilli	202.18	31	15.333
25680-4A	Pocillopora meandrina	Kaua‘i	2019-10-10	Apparently normal	tentacle	epidermis	Gram Negative	bacilli	202.18	31	15.333
25680-4A	Pocillopora meandrina	Kaua‘i	2019-10-10	Apparently normal	tentacle	epidermis	Gram Negative	bacilli	202.18	31	15.333
25680-4A	Pocillopora meandrina	Kaua‘i	2019-10-10	Apparently normal	tentacle	epidermis	Gram Negative	bacilli	202.18	31	15.333
25680-4A	Pocillopora meandrina	Kaua‘i	2019-10-10	Apparently normal	tentacle	epidermis	Gram Negative	bacilli	202.18	31	15.333
25680-4A	Pocillopora meandrina	Kaua‘i	2019-10-10	Apparently normal	tentacle	epidermis	Gram Negative	bacilli	202.18	31	15.333
25680-4A	Pocillopora meandrina	Kaua‘i	2019-10-10	Apparently normal	tentacle	epidermis	Gram Negative	bacilli	202.18	31	15.333
25680-4A	Pocillopora meandrina	Kaua‘i	2019-10-10	Apparently normal	tentacle	epidermis	Gram Negative	bacilli	202.18	31	15.333
25680-4A	Pocillopora meandrina	Kaua‘i	2019-10-10	Apparently normal	tentacle	epidermis	Gram Negative	bacilli	202.18	31	15.333
25680-4A	Pocillopora meandrina	Kaua‘i	2019-10-10	Apparently normal	tentacle	epidermis	Gram Negative	bacilli	202.18	31	15.333
25680-4A	Pocillopora meandrina	Kaua‘i	2019-10-10	Apparently normal	tentacle	epidermis	Gram Negative	bacilli	202.18	31	15.333
25680-4A	Pocillopora meandrina	Kaua‘i	2019-10-10	Apparently normal	tentacle	epidermis	Gram Negative	bacilli	202.18	31	15.333
25680-4A	Pocillopora meandrina	Kaua‘i	2019-10-10	Apparently normal	tentacle	epidermis	Gram Negative	bacilli	202.18	31	15.333
25680-4A	Pocillopora meandrina	Kaua‘i	2019-10-10	Apparently normal	tentacle	epidermis	Gram Negative	bacilli	202.18	31	15.333
25680-4A	Pocillopora meandrina	Kaua‘i	2019-10-10	Apparently normal	tentacle	epidermis	Gram Negative	bacilli	202.18	31	15.333
25680-4A	Pocillopora meandrina	Kaua‘i	2019-10-10	Apparently normal	tentacle	epidermis	Gram Negative	bacilli	202.18	31	15.333
25680-4A	Pocillopora meandrina	Kaua‘i	2019-10-10	Apparently normal	tentacle	epidermis	Gram Negative	bacilli	202.18	31	15.333
25680-4A	Pocillopora meandrina	Kaua‘i	2019-10-10	Apparently normal	tentacle	epidermis	Gram Negative	bacilli	202.18	31	15.333
25680-4A	Pocillopora meandrina	Kaua‘i	2019-10-10	Apparently normal	tentacle	epidermis	Gram Negative	bacilli	202.18	31	15.333
25680-4A	Pocillopora meandrina	Kaua‘i	2019-10-10	Apparently normal	tentacle	epidermis	Gram Negative	bacilli	202.18	31	15.333
25680-4A	Pocillopora meandrina	Kaua‘i	2019-10-10	Apparently normal	tentacle	epidermis	Gram Negative	bacilli	202.18	31	15.333
25680-4A	Pocillopora meandrina	Kaua‘i	2019-10-10	Apparently normal	tentacle	epidermis	Gram Negative	bacilli	202.18	31	15.333
25680-5A	Pocillopora meandrina	Kaua‘i	2019-10-10	Apparently normal	tentacle	epidermis	Gram Negative	bacilli	188.27	7	3.71799
25680-5A	Pocillopora meandrina	Kaua‘i	2019-10-10	Apparently normal	tentacle	epidermis	Gram Negative	bacilli	188.27	7	3.71799
25680-5A	Pocillopora meandrina	Kaua‘i	2019-10-10	Apparently normal	tentacle	epidermis	Gram Negative	bacilli	188.27	7	3.71799
25680-5A	Pocillopora meandrina	Kaua‘i	2019-10-10	Apparently normal	tentacle	epidermis	Gram Negative	undetermined	188.27	7	3.71799
25680-5A	Pocillopora meandrina	Kaua‘i	2019-10-10	Apparently normal	tentacle	epidermis	Gram Negative	bacilli	188.27	7	3.71799
25680-5A	Pocillopora meandrina	Kaua‘i	2019-10-10	Apparently normal	tentacle	epidermis	Gram Negative	bacilli	188.27	7	3.71799
25680-5A	Pocillopora meandrina	Kaua‘i	2019-10-10	Apparently normal	tentacle	epidermis	Gram Negative	bacilli	188.27	7	3.71799
25680-6A	Pocillopora meandrina	Kaua‘i	2019-10-10	Apparently normal	tentacle	epidermis	Gram Negative	bacilli	153.01	5	3.26766
25680-6A	Pocillopora meandrina	Kaua‘i	2019-10-10	Apparently normal	tentacle	epidermis	Gram Negative	undetermined	153.01	5	3.26766
25680-6A	Pocillopora meandrina	Kaua‘i	2019-10-10	Apparently normal	tentacle	epidermis	Gram Negative	bacilli	153.01	5	3.26766
25680-6A	Pocillopora meandrina	Kaua‘i	2019-10-10	Apparently normal	tentacle	epidermis	Gram Negative	bacilli	153.01	5	3.26766
25680-6A	Pocillopora meandrina	Kaua‘i	2019-10-10	Apparently normal	tentacle	epidermis	Gram Negative	bacilli	153.01	5	3.26766
25680-7A	Pocillopora meandrina	Kaua‘i	2019-10-10	Apparently normal	tentacle	epidermis	Gram Negative	bacilli	170.12	43	25.2759
25680-7A	Pocillopora meandrina	Kaua‘i	2019-10-10	Apparently normal	tentacle	epidermis	Gram Negative	bacilli	170.12	43	25.2759
25680-7A	Pocillopora meandrina	Kaua‘i	2019-10-10	Apparently normal	tentacle	mesoglea	Gram Negative	bacilli	170.12	43	25.2759
25680-7A	Pocillopora meandrina	Kaua‘i	2019-10-10	Apparently normal	tentacle	mesoglea	Gram Negative	bacilli	170.12	43	25.2759
25680-7A	Pocillopora meandrina	Kaua‘i	2019-10-10	Apparently normal	tentacle	mesoglea	Gram Negative	bacilli	170.12	43	25.2759
25680-7A	Pocillopora meandrina	Kaua‘i	2019-10-10	Apparently normal	tentacle	mesoglea	Gram Negative	bacilli	170.12	43	25.2759
25680-7A	Pocillopora meandrina	Kaua‘i	2019-10-10	Apparently normal	tentacle	mesoglea	Gram Negative	bacilli	170.12	43	25.2759
25680-7A	Pocillopora meandrina	Kaua‘i	2019-10-10	Apparently normal	tentacle	mesoglea	Gram Negative	bacilli	170.12	43	25.2759
25680-7A	Pocillopora meandrina	Kaua‘i	2019-10-10	Apparently normal	tentacle	mesoglea	Gram Negative	bacilli	170.12	43	25.2759
25680-7A	Pocillopora meandrina	Kaua‘i	2019-10-10	Apparently normal	tentacle	epidermis	Gram Negative	bacilli	170.12	43	25.2759
25680-7A	Pocillopora meandrina	Kaua‘i	2019-10-10	Apparently normal	tentacle	epidermis	Gram Negative	bacilli	170.12	43	25.2759
25680-7A	Pocillopora meandrina	Kaua‘i	2019-10-10	Apparently normal	tentacle	epidermis	Gram Negative	bacilli	170.12	43	25.2759
25680-7A	Pocillopora meandrina	Kaua‘i	2019-10-10	Apparently normal	tentacle	mesoglea	Gram Negative	undetermined	170.12	43	25.2759
25680-7A	Pocillopora meandrina	Kaua‘i	2019-10-10	Apparently normal	tentacle	epidermis	Gram Negative	bacilli	170.12	43	25.2759
25680-7A	Pocillopora meandrina	Kaua‘i	2019-10-10	Apparently normal	tentacle	epidermis	Gram Negative	bacilli	170.12	43	25.2759
25680-7A	Pocillopora meandrina	Kaua‘i	2019-10-10	Apparently normal	tentacle	epidermis	Gram Negative	bacilli	170.12	43	25.2759
25680-7A	Pocillopora meandrina	Kaua‘i	2019-10-10	Apparently normal	tentacle	epidermis	Gram Negative	bacilli	170.12	43	25.2759
25680-7A	Pocillopora meandrina	Kaua‘i	2019-10-10	Apparently normal	tentacle	epidermis	Gram Negative	bacilli	170.12	43	25.2759
25680-7A	Pocillopora meandrina	Kaua‘i	2019-10-10	Apparently normal	tentacle	epidermis	Gram Negative	bacilli	170.12	43	25.2759
25680-7A	Pocillopora meandrina	Kaua‘i	2019-10-10	Apparently normal	tentacle	epidermis	Gram Negative	bacilli	170.12	43	25.2759
25680-7A	Pocillopora meandrina	Kaua‘i	2019-10-10	Apparently normal	tentacle	epidermis	Gram Negative	bacilli	170.12	43	25.2759
25680-7A	Pocillopora meandrina	Kaua‘i	2019-10-10	Apparently normal	tentacle	gastrodermis	Gram Negative	bacilli	170.12	43	25.2759
25680-7A	Pocillopora meandrina	Kaua‘i	2019-10-10	Apparently normal	tentacle	epidermis	Gram Negative	bacilli	170.12	43	25.2759
25680-7A	Pocillopora meandrina	Kaua‘i	2019-10-10	Apparently normal	tentacle	epidermis	Gram Negative	bacilli	170.12	43	25.2759
25680-7A	Pocillopora meandrina	Kaua‘i	2019-10-10	Apparently normal	tentacle	epidermis	Gram Negative	bacilli	170.12	43	25.2759
25680-7A	Pocillopora meandrina	Kaua‘i	2019-10-10	Apparently normal	tentacle	epidermis	Gram Negative	undetermined	170.12	43	25.2759
25680-7A	Pocillopora meandrina	Kaua‘i	2019-10-10	Apparently normal	tentacle	epidermis	Gram Negative	bacilli	170.12	43	25.2759
25680-7A	Pocillopora meandrina	Kaua‘i	2019-10-10	Apparently normal	tentacle	epidermis	Gram Negative	bacilli	170.12	43	25.2759
25680-7A	Pocillopora meandrina	Kaua‘i	2019-10-10	Apparently normal	tentacle	epidermis	Gram Negative	bacilli	170.12	43	25.2759
25680-7A	Pocillopora meandrina	Kaua‘i	2019-10-10	Apparently normal	tentacle	epidermis	Gram Negative	bacilli	170.12	43	25.2759
25680-7A	Pocillopora meandrina	Kaua‘i	2019-10-10	Apparently normal	tentacle	epidermis	Gram Negative	bacilli	170.12	43	25.2759
25680-7A	Pocillopora meandrina	Kaua‘i	2019-10-10	Apparently normal	tentacle	epidermis	Gram Negative	bacilli	170.12	43	25.2759
25680-7A	Pocillopora meandrina	Kaua‘i	2019-10-10	Apparently normal	tentacle	epidermis	Gram Negative	undetermined	170.12	43	25.2759
25680-7A	Pocillopora meandrina	Kaua‘i	2019-10-10	Apparently normal	tentacle	epidermis	Gram Negative	bacilli	170.12	43	25.2759
25680-7A	Pocillopora meandrina	Kaua‘i	2019-10-10	Apparently normal	tentacle	epidermis	Gram Negative	bacilli	170.12	43	25.2759
25680-7A	Pocillopora meandrina	Kaua‘i	2019-10-10	Apparently normal	tentacle	epidermis	Gram Negative	bacilli	170.12	43	25.2759
25680-7A	Pocillopora meandrina	Kaua‘i	2019-10-10	Apparently normal	tentacle	epidermis	Gram Negative	bacilli	170.12	43	25.2759
25680-7A	Pocillopora meandrina	Kaua‘i	2019-10-10	Apparently normal	tentacle	mesoglea	Gram Negative	bacilli	170.12	43	25.2759
25680-7A	Pocillopora meandrina	Kaua‘i	2019-10-10	Apparently normal	tentacle	epidermis	Gram Negative	bacilli	170.12	43	25.2759
25680-7A	Pocillopora meandrina	Kaua‘i	2019-10-10	Apparently normal	tentacle	mesoglea	Gram Negative	bacilli	170.12	43	25.2759
25680-7A	Pocillopora meandrina	Kaua‘i	2019-10-10	Apparently normal	tentacle	epidermis	Gram Negative	bacilli	170.12	43	25.2759
25680-7A	Pocillopora meandrina	Kaua‘i	2019-10-10	Apparently normal	tentacle	epidermis	Gram Negative	bacilli	170.12	43	25.2759
25680-7A	Pocillopora meandrina	Kaua‘i	2019-10-10	Apparently normal	tentacle	epidermis	Gram Negative	bacilli	170.12	43	25.2759
25786-10A	Pocillopora grandis	Kaua‘i	2021-04-28	Apparently normal	tentacle	epidermis	Gram Negative	bacilli	131.41	3	2.283
25786-10A	Pocillopora grandis	Kaua‘i	2021-04-28	Apparently normal	tentacle	epidermis	Gram Negative	bacilli	131.41	3	2.283
25786-10A	Pocillopora grandis	Kaua‘i	2021-04-28	Apparently normal	tentacle	epidermis	Gram Negative	bacilli	131.41	3	2.283
25786-11A	Pocillopora grandis	Kaua‘i	2021-04-28	Apparently normal	tentacle	epidermis	Gram Negative	bacilli	157.66	10	6.34277
25786-11A	Pocillopora grandis	Kaua‘i	2021-04-28	Apparently normal	tentacle	epidermis	Gram Negative	bacilli	157.66	10	6.34277
25786-11A	Pocillopora grandis	Kaua‘i	2021-04-28	Apparently normal	tentacle	epidermis	Gram Negative	bacilli	157.66	10	6.34277
25786-11A	Pocillopora grandis	Kaua‘i	2021-04-28	Apparently normal	tentacle	epidermis	Gram Negative	bacilli	157.66	10	6.34277
25786-11A	Pocillopora grandis	Kaua‘i	2021-04-28	Apparently normal	tentacle	epidermis	Gram Negative	bacilli	157.66	10	6.34277
25786-11A	Pocillopora grandis	Kaua‘i	2021-04-28	Apparently normal	tentacle	epidermis	Gram Negative	bacilli	157.66	10	6.34277
25786-11A	Pocillopora grandis	Kaua‘i	2021-04-28	Apparently normal	mesentery	mesoglea	Gram Negative	bacilli	157.66	10	6.34277
25786-11A	Pocillopora grandis	Kaua‘i	2021-04-28	Apparently normal	mesentery	mesoglea	Gram Positive	bacilli	157.66	10	6.34277
25786-11A	Pocillopora grandis	Kaua‘i	2021-04-28	Apparently normal	tentacle	epidermis	Gram Negative	bacilli	157.66	10	6.34277
25786-11A	Pocillopora grandis	Kaua‘i	2021-04-28	Apparently normal	tentacle	epidermis	Gram Negative	bacilli	157.66	10	6.34277
25786-13A	Pocillopora grandis	Kaua‘i	2021-04-28	Apparently normal	mesentery	mesoglea	Gram Negative	bacilli	152.97	9	5.88366
25786-13A	Pocillopora grandis	Kaua‘i	2021-04-28	Apparently normal	tentacle	epidermis	Gram Negative	bacilli	152.97	9	5.88366
25786-13A	Pocillopora grandis	Kaua‘i	2021-04-28	Apparently normal	tentacle	epidermis	Gram Negative	bacilli	152.97	9	5.88366
25786-13A	Pocillopora grandis	Kaua‘i	2021-04-28	Apparently normal	tentacle	mesoglea	Gram Negative	bacilli	152.97	9	5.88366
25786-13A	Pocillopora grandis	Kaua‘i	2021-04-28	Apparently normal	mesentery	mesoglea	Gram Negative	bacilli	152.97	9	5.88366
25786-13A	Pocillopora grandis	Kaua‘i	2021-04-28	Apparently normal	mesentery	epidermis	Gram Negative	bacilli	152.97	9	5.88366
25786-13A	Pocillopora grandis	Kaua‘i	2021-04-28	Apparently normal	mesentery	mesoglea	Gram Negative	bacilli	152.97	9	5.88366
25786-13A	Pocillopora grandis	Kaua‘i	2021-04-28	Apparently normal	tentacle	epidermis	Gram Negative	bacilli	152.97	9	5.88366
25786-13A	Pocillopora grandis	Kaua‘i	2021-04-28	Apparently normal	tentacle	mesoglea	Gram Negative	bacilli	152.97	9	5.88366
25786-1A	Pocillopora grandis	Kaua‘i	2021-04-28	Tissue loss	tentacle	epidermis	Gram Negative	bacilli	307.02	21	6.84004
25786-1A	Pocillopora grandis	Kaua‘i	2021-04-28	Tissue loss	tentacle	epidermis	Gram Negative	bacilli	307.02	21	6.84004
25786-1A	Pocillopora grandis	Kaua‘i	2021-04-28	Tissue loss	tentacle	epidermis	Gram Negative	bacilli	307.02	21	6.84004
25786-1A	Pocillopora grandis	Kaua‘i	2021-04-28	Tissue loss	tentacle	epidermis	Gram Negative	bacilli	307.02	21	6.84004
25786-1A	Pocillopora grandis	Kaua‘i	2021-04-28	Tissue loss	tentacle	epidermis	Gram Negative	bacilli	307.02	21	6.84004
25786-1A	Pocillopora grandis	Kaua‘i	2021-04-28	Tissue loss	tentacle	epidermis	Gram Negative	bacilli	307.02	21	6.84004
25786-1A	Pocillopora grandis	Kaua‘i	2021-04-28	Tissue loss	tentacle	epidermis	Gram Negative	bacilli	307.02	21	6.84004
25786-1A	Pocillopora grandis	Kaua‘i	2021-04-28	Tissue loss	tentacle	epidermis	Gram Positive	bacilli	307.02	21	6.84004
25786-1A	Pocillopora grandis	Kaua‘i	2021-04-28	Tissue loss	tentacle	epidermis	Gram Negative	bacilli	307.02	21	6.84004
25786-1A	Pocillopora grandis	Kaua‘i	2021-04-28	Tissue loss	tentacle	epidermis	Gram Positive	bacilli	307.02	21	6.84004
25786-1A	Pocillopora grandis	Kaua‘i	2021-04-28	Tissue loss	tentacle	epidermis	Gram Positive	bacilli	307.02	21	6.84004
25786-1A	Pocillopora grandis	Kaua‘i	2021-04-28	Tissue loss	tentacle	epidermis	Gram Positive	bacilli	307.02	21	6.84004
25786-1A	Pocillopora grandis	Kaua‘i	2021-04-28	Tissue loss	tentacle	epidermis	Gram Positive	bacilli	307.02	21	6.84004
25786-1A	Pocillopora grandis	Kaua‘i	2021-04-28	Tissue loss	tentacle	epidermis	Gram Negative	bacilli	307.02	21	6.84004
25786-1A	Pocillopora grandis	Kaua‘i	2021-04-28	Tissue loss	tentacle	epidermis	Gram Negative	bacilli	307.02	21	6.84004
25786-1A	Pocillopora grandis	Kaua‘i	2021-04-28	Tissue loss	tentacle	epidermis	Gram Negative	bacilli	307.02	21	6.84004
25786-1A	Pocillopora grandis	Kaua‘i	2021-04-28	Tissue loss	tentacle	epidermis	Gram Negative	bacilli	307.02	21	6.84004
25786-1A	Pocillopora grandis	Kaua‘i	2021-04-28	Tissue loss	tentacle	epidermis	Gram Negative	bacilli	307.02	21	6.84004
25786-1A	Pocillopora grandis	Kaua‘i	2021-04-28	Tissue loss	tentacle	epidermis	Gram Negative	bacilli	307.02	21	6.84004
25786-1A	Pocillopora grandis	Kaua‘i	2021-04-28	Tissue loss	tentacle	epidermis	Gram Negative	bacilli	307.02	21	6.84004
25786-1A	Pocillopora grandis	Kaua‘i	2021-04-28	Tissue loss	tentacle	epidermis	Gram Negative	bacilli	307.02	21	6.84004
25786-2A	Pocillopora grandis	Kaua‘i	2021-04-28	Apparently normal	tentacle	epidermis	Gram Negative	bacilli	247.29	58	23.4545
25786-2A	Pocillopora grandis	Kaua‘i	2021-04-28	Apparently normal	tentacle	epidermis	Gram Negative	bacilli	247.29	58	23.4545
25786-2A	Pocillopora grandis	Kaua‘i	2021-04-28	Apparently normal	tentacle	epidermis	Gram Negative	bacilli	247.29	58	23.4545
25786-2A	Pocillopora grandis	Kaua‘i	2021-04-28	Apparently normal	tentacle	epidermis	Gram Negative	bacilli	247.29	58	23.4545
25786-2A	Pocillopora grandis	Kaua‘i	2021-04-28	Apparently normal	tentacle	epidermis	Gram Negative	bacilli	247.29	58	23.4545
25786-2A	Pocillopora grandis	Kaua‘i	2021-04-28	Apparently normal	tentacle	epidermis	Gram Negative	undetermined	247.29	58	23.4545
25786-2A	Pocillopora grandis	Kaua‘i	2021-04-28	Apparently normal	tentacle	epidermis	Gram Negative	bacilli	247.29	58	23.4545
25786-2A	Pocillopora grandis	Kaua‘i	2021-04-28	Apparently normal	tentacle	epidermis	Gram Negative	bacilli	247.29	58	23.4545
25786-2A	Pocillopora grandis	Kaua‘i	2021-04-28	Apparently normal	tentacle	epidermis	Gram Negative	bacilli	247.29	58	23.4545
25786-2A	Pocillopora grandis	Kaua‘i	2021-04-28	Apparently normal	tentacle	epidermis	Gram Negative	bacilli	247.29	58	23.4545
25786-2A	Pocillopora grandis	Kaua‘i	2021-04-28	Apparently normal	tentacle	epidermis	Gram Negative	bacilli	247.29	58	23.4545
25786-2A	Pocillopora grandis	Kaua‘i	2021-04-28	Apparently normal	tentacle	epidermis	Gram Negative	bacilli	247.29	58	23.4545
25786-2A	Pocillopora grandis	Kaua‘i	2021-04-28	Apparently normal	tentacle	epidermis	Gram Negative	bacilli	247.29	58	23.4545
25786-2A	Pocillopora grandis	Kaua‘i	2021-04-28	Apparently normal	tentacle	epidermis	Gram Negative	bacilli	247.29	58	23.4545
25786-2A	Pocillopora grandis	Kaua‘i	2021-04-28	Apparently normal	tentacle	epidermis	Gram Negative	bacilli	247.29	58	23.4545
25786-2A	Pocillopora grandis	Kaua‘i	2021-04-28	Apparently normal	tentacle	epidermis	Gram Negative	bacilli	247.29	58	23.4545
25786-2A	Pocillopora grandis	Kaua‘i	2021-04-28	Apparently normal	tentacle	epidermis	Gram Negative	bacilli	247.29	58	23.4545
25786-2A	Pocillopora grandis	Kaua‘i	2021-04-28	Apparently normal	tentacle	epidermis	Gram Negative	bacilli	247.29	58	23.4545
25786-2A	Pocillopora grandis	Kaua‘i	2021-04-28	Apparently normal	tentacle	epidermis	Gram Negative	bacilli	247.29	58	23.4545
25786-2A	Pocillopora grandis	Kaua‘i	2021-04-28	Apparently normal	tentacle	epidermis	Gram Negative	bacilli	247.29	58	23.4545
25786-2A	Pocillopora grandis	Kaua‘i	2021-04-28	Apparently normal	tentacle	epidermis	Gram Negative	bacilli	247.29	58	23.4545
25786-2A	Pocillopora grandis	Kaua‘i	2021-04-28	Apparently normal	tentacle	epidermis	Gram Negative	bacilli	247.29	58	23.4545
25786-2A	Pocillopora grandis	Kaua‘i	2021-04-28	Apparently normal	tentacle	epidermis	Gram Negative	bacilli	247.29	58	23.4545
25786-2A	Pocillopora grandis	Kaua‘i	2021-04-28	Apparently normal	tentacle	epidermis	Gram Negative	bacilli	247.29	58	23.4545
25786-2A	Pocillopora grandis	Kaua‘i	2021-04-28	Apparently normal	tentacle	epidermis	Gram Negative	bacilli	247.29	58	23.4545
25786-2A	Pocillopora grandis	Kaua‘i	2021-04-28	Apparently normal	tentacle	epidermis	Gram Negative	bacilli	247.29	58	23.4545
25786-2A	Pocillopora grandis	Kaua‘i	2021-04-28	Apparently normal	tentacle	epidermis	Gram Negative	bacilli	247.29	58	23.4545
25786-2A	Pocillopora grandis	Kaua‘i	2021-04-28	Apparently normal	tentacle	epidermis	Gram Negative	bacilli	247.29	58	23.4545
25786-2A	Pocillopora grandis	Kaua‘i	2021-04-28	Apparently normal	tentacle	epidermis	Gram Negative	bacilli	247.29	58	23.4545
25786-2A	Pocillopora grandis	Kaua‘i	2021-04-28	Apparently normal	tentacle	epidermis	Gram Negative	bacilli	247.29	58	23.4545
25786-2A	Pocillopora grandis	Kaua‘i	2021-04-28	Apparently normal	tentacle	mesoglea	Gram Negative	bacilli	247.29	58	23.4545
25786-2A	Pocillopora grandis	Kaua‘i	2021-04-28	Apparently normal	tentacle	epidermis	Gram Negative	bacilli	247.29	58	23.4545
25786-2A	Pocillopora grandis	Kaua‘i	2021-04-28	Apparently normal	tentacle	epidermis	Gram Negative	bacilli	247.29	58	23.4545
25786-2A	Pocillopora grandis	Kaua‘i	2021-04-28	Apparently normal	tentacle	epidermis	Gram Negative	bacilli	247.29	58	23.4545
25786-2A	Pocillopora grandis	Kaua‘i	2021-04-28	Apparently normal	tentacle	epidermis	Gram Negative	bacilli	247.29	58	23.4545
25786-2A	Pocillopora grandis	Kaua‘i	2021-04-28	Apparently normal	tentacle	epidermis	Gram Negative	bacilli	247.29	58	23.4545
25786-2A	Pocillopora grandis	Kaua‘i	2021-04-28	Apparently normal	tentacle	epidermis	Gram Negative	bacilli	247.29	58	23.4545
25786-2A	Pocillopora grandis	Kaua‘i	2021-04-28	Apparently normal	tentacle	epidermis	Gram Negative	bacilli	247.29	58	23.4545
25786-2A	Pocillopora grandis	Kaua‘i	2021-04-28	Apparently normal	tentacle	epidermis	Gram Negative	bacilli	247.29	58	23.4545
25786-2A	Pocillopora grandis	Kaua‘i	2021-04-28	Apparently normal	tentacle	epidermis	Gram Negative	bacilli	247.29	58	23.4545
25786-2A	Pocillopora grandis	Kaua‘i	2021-04-28	Apparently normal	tentacle	epidermis	Gram Negative	bacilli	247.29	58	23.4545
25786-2A	Pocillopora grandis	Kaua‘i	2021-04-28	Apparently normal	tentacle	epidermis	Gram Negative	bacilli	247.29	58	23.4545
25786-2A	Pocillopora grandis	Kaua‘i	2021-04-28	Apparently normal	tentacle	epidermis	Gram Negative	bacilli	247.29	58	23.4545
25786-2A	Pocillopora grandis	Kaua‘i	2021-04-28	Apparently normal	tentacle	epidermis	Gram Negative	bacilli	247.29	58	23.4545
25786-2A	Pocillopora grandis	Kaua‘i	2021-04-28	Apparently normal	tentacle	epidermis	Gram Negative	bacilli	247.29	58	23.4545
25786-2A	Pocillopora grandis	Kaua‘i	2021-04-28	Apparently normal	tentacle	epidermis	Gram Negative	bacilli	247.29	58	23.4545
25786-2A	Pocillopora grandis	Kaua‘i	2021-04-28	Apparently normal	tentacle	epidermis	Gram Negative	bacilli	247.29	58	23.4545
25786-2A	Pocillopora grandis	Kaua‘i	2021-04-28	Apparently normal	tentacle	epidermis	Gram Negative	bacilli	247.29	58	23.4545
25786-2A	Pocillopora grandis	Kaua‘i	2021-04-28	Apparently normal	tentacle	epidermis	Gram Negative	bacilli	247.29	58	23.4545
25786-2A	Pocillopora grandis	Kaua‘i	2021-04-28	Apparently normal	tentacle	epidermis	Gram Negative	bacilli	247.29	58	23.4545
25786-2A	Pocillopora grandis	Kaua‘i	2021-04-28	Apparently normal	tentacle	epidermis	Gram Negative	bacilli	247.29	58	23.4545
25786-2A	Pocillopora grandis	Kaua‘i	2021-04-28	Apparently normal	tentacle	epidermis	Gram Negative	bacilli	247.29	58	23.4545
25786-2A	Pocillopora grandis	Kaua‘i	2021-04-28	Apparently normal	tentacle	epidermis	Gram Negative	bacilli	247.29	58	23.4545
25786-2A	Pocillopora grandis	Kaua‘i	2021-04-28	Apparently normal	tentacle	epidermis	Gram Negative	bacilli	247.29	58	23.4545
25786-2A	Pocillopora grandis	Kaua‘i	2021-04-28	Apparently normal	tentacle	epidermis	Gram Negative	bacilli	247.29	58	23.4545
25786-2A	Pocillopora grandis	Kaua‘i	2021-04-28	Apparently normal	tentacle	epidermis	Gram Negative	bacilli	247.29	58	23.4545
25786-2A	Pocillopora grandis	Kaua‘i	2021-04-28	Apparently normal	tentacle	epidermis	Gram Negative	bacilli	247.29	58	23.4545
25786-2A	Pocillopora grandis	Kaua‘i	2021-04-28	Apparently normal	tentacle	epidermis	Gram Negative	bacilli	247.29	58	23.4545
25786-3A	Pocillopora grandis	Kaua‘i	2021-04-28	Tissue loss	tentacle	epidermis	Gram Negative	bacilli	102.94	29	28.1709
25786-3A	Pocillopora grandis	Kaua‘i	2021-04-28	Tissue loss	tentacle	epidermis	Gram Negative	bacilli	102.94	29	28.1709
25786-3A	Pocillopora grandis	Kaua‘i	2021-04-28	Tissue loss	tentacle	epidermis	Gram Negative	bacilli	102.94	29	28.1709
25786-3A	Pocillopora grandis	Kaua‘i	2021-04-28	Tissue loss	tentacle	epidermis	Gram Negative	bacilli	102.94	29	28.1709
25786-3A	Pocillopora grandis	Kaua‘i	2021-04-28	Tissue loss	tentacle	epidermis	Gram Negative	bacilli	102.94	29	28.1709
25786-3A	Pocillopora grandis	Kaua‘i	2021-04-28	Tissue loss	tentacle	epidermis	Gram Negative	bacilli	102.94	29	28.1709
25786-3A	Pocillopora grandis	Kaua‘i	2021-04-28	Tissue loss	tentacle	epidermis	Gram Negative	bacilli	102.94	29	28.1709
25786-3A	Pocillopora grandis	Kaua‘i	2021-04-28	Tissue loss	tentacle	epidermis	Gram Negative	bacilli	102.94	29	28.1709
25786-3A	Pocillopora grandis	Kaua‘i	2021-04-28	Tissue loss	tentacle	epidermis	Gram Negative	bacilli	102.94	29	28.1709
25786-3A	Pocillopora grandis	Kaua‘i	2021-04-28	Tissue loss	tentacle	epidermis	Gram Negative	bacilli	102.94	29	28.1709
25786-3A	Pocillopora grandis	Kaua‘i	2021-04-28	Tissue loss	tentacle	epidermis	Gram Negative	bacilli	102.94	29	28.1709
25786-3A	Pocillopora grandis	Kaua‘i	2021-04-28	Tissue loss	tentacle	epidermis	Gram Negative	bacilli	102.94	29	28.1709
25786-3A	Pocillopora grandis	Kaua‘i	2021-04-28	Tissue loss	tentacle	epidermis	Gram Negative	bacilli	102.94	29	28.1709
25786-3A	Pocillopora grandis	Kaua‘i	2021-04-28	Tissue loss	tentacle	epidermis	Gram Negative	bacilli	102.94	29	28.1709
25786-3A	Pocillopora grandis	Kaua‘i	2021-04-28	Tissue loss	tentacle	epidermis	Gram Negative	bacilli	102.94	29	28.1709
25786-3A	Pocillopora grandis	Kaua‘i	2021-04-28	Tissue loss	tentacle	epidermis	Gram Negative	bacilli	102.94	29	28.1709
25786-3A	Pocillopora grandis	Kaua‘i	2021-04-28	Tissue loss	tentacle	epidermis	Gram Negative	bacilli	102.94	29	28.1709
25786-3A	Pocillopora grandis	Kaua‘i	2021-04-28	Tissue loss	tentacle	epidermis	Gram Negative	bacilli	102.94	29	28.1709
25786-3A	Pocillopora grandis	Kaua‘i	2021-04-28	Tissue loss	tentacle	epidermis	Gram Negative	bacilli	102.94	29	28.1709
25786-3A	Pocillopora grandis	Kaua‘i	2021-04-28	Tissue loss	tentacle	epidermis	Gram Negative	bacilli	102.94	29	28.1709
25786-3A	Pocillopora grandis	Kaua‘i	2021-04-28	Tissue loss	tentacle	epidermis	Gram Negative	bacilli	102.94	29	28.1709
25786-3A	Pocillopora grandis	Kaua‘i	2021-04-28	Tissue loss	tentacle	epidermis	Gram Negative	bacilli	102.94	29	28.1709
25786-3A	Pocillopora grandis	Kaua‘i	2021-04-28	Tissue loss	tentacle	epidermis	Gram Negative	bacilli	102.94	29	28.1709
25786-3A	Pocillopora grandis	Kaua‘i	2021-04-28	Tissue loss	tentacle	epidermis	Gram Negative	bacilli	102.94	29	28.1709
25786-3A	Pocillopora grandis	Kaua‘i	2021-04-28	Tissue loss	tentacle	epidermis	Gram Negative	bacilli	102.94	29	28.1709
25786-3A	Pocillopora grandis	Kaua‘i	2021-04-28	Tissue loss	tentacle	epidermis	Gram Negative	bacilli	102.94	29	28.1709
25786-3A	Pocillopora grandis	Kaua‘i	2021-04-28	Tissue loss	tentacle	epidermis	Gram Negative	bacilli	102.94	29	28.1709
25786-3A	Pocillopora grandis	Kaua‘i	2021-04-28	Tissue loss	tentacle	epidermis	Gram Negative	bacilli	102.94	29	28.1709
25786-3A	Pocillopora grandis	Kaua‘i	2021-04-28	Tissue loss	tentacle	epidermis	Gram Negative	bacilli	102.94	29	28.1709
25786-4A	Pocillopora grandis	Kaua‘i	2021-04-28	Apparently normal	tentacle	epidermis	Gram Negative	undetermined	43.32	11	25.3946
25786-4A	Pocillopora grandis	Kaua‘i	2021-04-28	Apparently normal	tentacle	epidermis	Gram Negative	undetermined	43.32	11	25.3946
25786-4A	Pocillopora grandis	Kaua‘i	2021-04-28	Apparently normal	tentacle	epidermis	Gram Negative	undetermined	43.32	11	25.3946
25786-4A	Pocillopora grandis	Kaua‘i	2021-04-28	Apparently normal	tentacle	epidermis	Gram Negative	undetermined	43.32	11	25.3946
25786-4A	Pocillopora grandis	Kaua‘i	2021-04-28	Apparently normal	tentacle	epidermis	Gram Negative	undetermined	43.32	11	25.3946
25786-4A	Pocillopora grandis	Kaua‘i	2021-04-28	Apparently normal	tentacle	epidermis	Gram Negative	undetermined	43.32	11	25.3946
25786-4A	Pocillopora grandis	Kaua‘i	2021-04-28	Apparently normal	tentacle	epidermis	Gram Negative	undetermined	43.32	11	25.3946
25786-4A	Pocillopora grandis	Kaua‘i	2021-04-28	Apparently normal	tentacle	epidermis	Gram Negative	undetermined	43.32	11	25.3946
25786-4A	Pocillopora grandis	Kaua‘i	2021-04-28	Apparently normal	tentacle	epidermis	Gram Negative	undetermined	43.32	11	25.3946
25786-4A	Pocillopora grandis	Kaua‘i	2021-04-28	Apparently normal	tentacle	epidermis	Gram Negative	undetermined	43.32	11	25.3946
25786-4A	Pocillopora grandis	Kaua‘i	2021-04-28	Apparently normal	tentacle	epidermis	Gram Negative	undetermined	43.32	11	25.3946
25786-5A	Pocillopora grandis	Kaua‘i	2021-04-28	Tissue loss	tentacle	epidermis	Gram Negative	undetermined	145.09	28	19.299
25786-5A	Pocillopora grandis	Kaua‘i	2021-04-28	Tissue loss	tentacle	epidermis	Gram Negative	undetermined	145.09	28	19.299
25786-5A	Pocillopora grandis	Kaua‘i	2021-04-28	Tissue loss	tentacle	epidermis	Gram Negative	bacilli	145.09	28	19.299
25786-5A	Pocillopora grandis	Kaua‘i	2021-04-28	Tissue loss	tentacle	epidermis	Gram Negative	bacilli	145.09	28	19.299
25786-5A	Pocillopora grandis	Kaua‘i	2021-04-28	Tissue loss	tentacle	epidermis	Gram Negative	bacilli	145.09	28	19.299
25786-5A	Pocillopora grandis	Kaua‘i	2021-04-28	Tissue loss	tentacle	epidermis	Gram Negative	bacilli	145.09	28	19.299
25786-5A	Pocillopora grandis	Kaua‘i	2021-04-28	Tissue loss	tentacle	epidermis	Gram Negative	undetermined	145.09	28	19.299
25786-5A	Pocillopora grandis	Kaua‘i	2021-04-28	Tissue loss	tentacle	epidermis	Gram Negative	undetermined	145.09	28	19.299
25786-5A	Pocillopora grandis	Kaua‘i	2021-04-28	Tissue loss	tentacle	epidermis	Gram Negative	undetermined	145.09	28	19.299
25786-5A	Pocillopora grandis	Kaua‘i	2021-04-28	Tissue loss	tentacle	epidermis	Gram Negative	undetermined	145.09	28	19.299
25786-5A	Pocillopora grandis	Kaua‘i	2021-04-28	Tissue loss	tentacle	epidermis	Gram Negative	undetermined	145.09	28	19.299
25786-5A	Pocillopora grandis	Kaua‘i	2021-04-28	Tissue loss	tentacle	epidermis	Gram Negative	undetermined	145.09	28	19.299
25786-5A	Pocillopora grandis	Kaua‘i	2021-04-28	Tissue loss	tentacle	epidermis	Gram Negative	undetermined	145.09	28	19.299
25786-5A	Pocillopora grandis	Kaua‘i	2021-04-28	Tissue loss	tentacle	epidermis	Gram Negative	undetermined	145.09	28	19.299
25786-5A	Pocillopora grandis	Kaua‘i	2021-04-28	Tissue loss	tentacle	epidermis	Gram Negative	undetermined	145.09	28	19.299
25786-5A	Pocillopora grandis	Kaua‘i	2021-04-28	Tissue loss	tentacle	epidermis	Gram Negative	undetermined	145.09	28	19.299
25786-5A	Pocillopora grandis	Kaua‘i	2021-04-28	Tissue loss	tentacle	mesoglea	Gram Negative	undetermined	145.09	28	19.299
25786-5A	Pocillopora grandis	Kaua‘i	2021-04-28	Tissue loss	tentacle	mesoglea	Gram Negative	undetermined	145.09	28	19.299
25786-5A	Pocillopora grandis	Kaua‘i	2021-04-28	Tissue loss	tentacle	epidermis	Gram Negative	undetermined	145.09	28	19.299
25786-5A	Pocillopora grandis	Kaua‘i	2021-04-28	Tissue loss	tentacle	epidermis	Gram Positive	undetermined	145.09	28	19.299
25786-5A	Pocillopora grandis	Kaua‘i	2021-04-28	Tissue loss	tentacle	epidermis	Gram Positive	bacilli	145.09	28	19.299
25786-5A	Pocillopora grandis	Kaua‘i	2021-04-28	Tissue loss	tentacle	epidermis	Gram Positive	bacilli	145.09	28	19.299
25786-5A	Pocillopora grandis	Kaua‘i	2021-04-28	Tissue loss	tentacle	epidermis	Gram Positive	bacilli	145.09	28	19.299
25786-5A	Pocillopora grandis	Kaua‘i	2021-04-28	Tissue loss	tentacle	epidermis	Gram Positive	bacilli	145.09	28	19.299
25786-5A	Pocillopora grandis	Kaua‘i	2021-04-28	Tissue loss	tentacle	epidermis	Gram Negative	bacilli	145.09	28	19.299
25786-5A	Pocillopora grandis	Kaua‘i	2021-04-28	Tissue loss	tentacle	epidermis	Gram Positive	bacilli	145.09	28	19.299
25786-5A	Pocillopora grandis	Kaua‘i	2021-04-28	Tissue loss	tentacle	epidermis	Gram Positive	bacilli	145.09	28	19.299
25786-5A	Pocillopora grandis	Kaua‘i	2021-04-28	Tissue loss	tentacle	epidermis	Gram Positive	bacilli	145.09	28	19.299
25786-6A	Pocillopora grandis	Kaua‘i	2021-04-28	Apparently normal	tentacle	epidermis	Gram Negative	bacilli	175.06	12	6.85485
25786-6A	Pocillopora grandis	Kaua‘i	2021-04-28	Apparently normal	tentacle	epidermis	Gram Negative	bacilli	175.06	12	6.85485
25786-6A	Pocillopora grandis	Kaua‘i	2021-04-28	Apparently normal	tentacle	epidermis	Gram Negative	bacilli	175.06	12	6.85485
25786-6A	Pocillopora grandis	Kaua‘i	2021-04-28	Apparently normal	tentacle	epidermis	Gram Negative	bacilli	175.06	12	6.85485
25786-6A	Pocillopora grandis	Kaua‘i	2021-04-28	Apparently normal	tentacle	epidermis	Gram Negative	bacilli	175.06	12	6.85485
25786-6A	Pocillopora grandis	Kaua‘i	2021-04-28	Apparently normal	tentacle	epidermis	Gram Negative	bacilli	175.06	12	6.85485
25786-6A	Pocillopora grandis	Kaua‘i	2021-04-28	Apparently normal	tentacle	epidermis	Gram Negative	bacilli	175.06	12	6.85485
25786-6A	Pocillopora grandis	Kaua‘i	2021-04-28	Apparently normal	tentacle	epidermis	Gram Negative	bacilli	175.06	12	6.85485
25786-6A	Pocillopora grandis	Kaua‘i	2021-04-28	Apparently normal	tentacle	mesoglea	Gram Negative	bacilli	175.06	12	6.85485
25786-6A	Pocillopora grandis	Kaua‘i	2021-04-28	Apparently normal	tentacle	epidermis	Gram Negative	bacilli	175.06	12	6.85485
25786-6A	Pocillopora grandis	Kaua‘i	2021-04-28	Apparently normal	tentacle	epidermis	Gram Negative	bacilli	175.06	12	6.85485
25786-6A	Pocillopora grandis	Kaua‘i	2021-04-28	Apparently normal	tentacle	epidermis	Gram Positive	bacilli	175.06	12	6.85485
25786-7A	Pocillopora grandis	Kaua‘i	2021-04-28	Bleaching	tentacle	epidermis	Gram Negative	bacilli	90.31	41	45.3971
25786-7A	Pocillopora grandis	Kaua‘i	2021-04-28	Bleaching	tentacle	epidermis	Gram Negative	bacilli	90.31	41	45.3971
25786-7A	Pocillopora grandis	Kaua‘i	2021-04-28	Bleaching	tentacle	epidermis	Gram Negative	bacilli	90.31	41	45.3971
25786-7A	Pocillopora grandis	Kaua‘i	2021-04-28	Bleaching	tentacle	epidermis	Gram Negative	bacilli	90.31	41	45.3971
25786-7A	Pocillopora grandis	Kaua‘i	2021-04-28	Bleaching	tentacle	epidermis	Gram Negative	bacilli	90.31	41	45.3971
25786-7A	Pocillopora grandis	Kaua‘i	2021-04-28	Bleaching	tentacle	epidermis	Gram Negative	bacilli	90.31	41	45.3971
25786-7A	Pocillopora grandis	Kaua‘i	2021-04-28	Bleaching	tentacle	epidermis	Gram Negative	bacilli	90.31	41	45.3971
25786-7A	Pocillopora grandis	Kaua‘i	2021-04-28	Bleaching	tentacle	epidermis	Gram Negative	bacilli	90.31	41	45.3971
25786-7A	Pocillopora grandis	Kaua‘i	2021-04-28	Bleaching	tentacle	epidermis	Gram Negative	bacilli	90.31	41	45.3971
25786-7A	Pocillopora grandis	Kaua‘i	2021-04-28	Bleaching	mesentery	epidermis	Gram Negative	bacilli	90.31	41	45.3971
25786-7A	Pocillopora grandis	Kaua‘i	2021-04-28	Bleaching	mesentery	epidermis	Gram Negative	bacilli	90.31	41	45.3971
25786-7A	Pocillopora grandis	Kaua‘i	2021-04-28	Bleaching	tentacle	epidermis	Gram Negative	bacilli	90.31	41	45.3971
25786-7A	Pocillopora grandis	Kaua‘i	2021-04-28	Bleaching	tentacle	epidermis	Gram Negative	bacilli	90.31	41	45.3971
25786-7A	Pocillopora grandis	Kaua‘i	2021-04-28	Bleaching	tentacle	epidermis	Gram Negative	bacilli	90.31	41	45.3971
25786-7A	Pocillopora grandis	Kaua‘i	2021-04-28	Bleaching	tentacle	epidermis	Gram Negative	bacilli	90.31	41	45.3971
25786-7A	Pocillopora grandis	Kaua‘i	2021-04-28	Bleaching	tentacle	epidermis	Gram Negative	bacilli	90.31	41	45.3971
25786-7A	Pocillopora grandis	Kaua‘i	2021-04-28	Bleaching	tentacle	epidermis	Gram Negative	bacilli	90.31	41	45.3971
25786-7A	Pocillopora grandis	Kaua‘i	2021-04-28	Bleaching	tentacle	epidermis	Gram Negative	bacilli	90.31	41	45.3971
25786-7A	Pocillopora grandis	Kaua‘i	2021-04-28	Bleaching	tentacle	epidermis	Gram Negative	bacilli	90.31	41	45.3971
25786-7A	Pocillopora grandis	Kaua‘i	2021-04-28	Bleaching	mesentery	epidermis	Gram Negative	bacilli	90.31	41	45.3971
25786-7A	Pocillopora grandis	Kaua‘i	2021-04-28	Bleaching	tentacle	epidermis	Gram Negative	bacilli	90.31	41	45.3971
25786-7A	Pocillopora grandis	Kaua‘i	2021-04-28	Bleaching	tentacle	epidermis	Gram Negative	bacilli	90.31	41	45.3971
25786-7A	Pocillopora grandis	Kaua‘i	2021-04-28	Bleaching	tentacle	epidermis	Gram Negative	bacilli	90.31	41	45.3971
25786-7A	Pocillopora grandis	Kaua‘i	2021-04-28	Bleaching	tentacle	epidermis	Gram Negative	bacilli	90.31	41	45.3971
25786-7A	Pocillopora grandis	Kaua‘i	2021-04-28	Bleaching	tentacle	gastrodermis	Gram Negative	bacilli	90.31	41	45.3971
25786-7A	Pocillopora grandis	Kaua‘i	2021-04-28	Bleaching	tentacle	epidermis	Gram Negative	bacilli	90.31	41	45.3971
25786-7A	Pocillopora grandis	Kaua‘i	2021-04-28	Bleaching	tentacle	epidermis	Gram Negative	bacilli	90.31	41	45.3971
25786-7A	Pocillopora grandis	Kaua‘i	2021-04-28	Bleaching	tentacle	epidermis	Gram Negative	bacilli	90.31	41	45.3971
25786-7A	Pocillopora grandis	Kaua‘i	2021-04-28	Bleaching	tentacle	epidermis	Gram Negative	bacilli	90.31	41	45.3971
25786-7A	Pocillopora grandis	Kaua‘i	2021-04-28	Bleaching	tentacle	epidermis	Gram Negative	bacilli	90.31	41	45.3971
25786-7A	Pocillopora grandis	Kaua‘i	2021-04-28	Bleaching	tentacle	epidermis	Gram Negative	bacilli	90.31	41	45.3971
25786-7A	Pocillopora grandis	Kaua‘i	2021-04-28	Bleaching	tentacle	epidermis	Gram Negative	bacilli	90.31	41	45.3971
25786-7A	Pocillopora grandis	Kaua‘i	2021-04-28	Bleaching	tentacle	epidermis	Gram Negative	bacilli	90.31	41	45.3971
25786-7A	Pocillopora grandis	Kaua‘i	2021-04-28	Bleaching	tentacle	epidermis	Gram Negative	bacilli	90.31	41	45.3971
25786-7A	Pocillopora grandis	Kaua‘i	2021-04-28	Bleaching	tentacle	epidermis	Gram Negative	bacilli	90.31	41	45.3971
25786-7A	Pocillopora grandis	Kaua‘i	2021-04-28	Bleaching	tentacle	epidermis	Gram Negative	bacilli	90.31	41	45.3971
25786-7A	Pocillopora grandis	Kaua‘i	2021-04-28	Bleaching	tentacle	epidermis	Gram Negative	bacilli	90.31	41	45.3971
25786-7A	Pocillopora grandis	Kaua‘i	2021-04-28	Bleaching	tentacle	epidermis	Gram Negative	bacilli	90.31	41	45.3971
25786-7A	Pocillopora grandis	Kaua‘i	2021-04-28	Bleaching	tentacle	epidermis	Gram Negative	bacilli	90.31	41	45.3971
25786-7A	Pocillopora grandis	Kaua‘i	2021-04-28	Bleaching	tentacle	epidermis	Gram Negative	bacilli	90.31	41	45.3971
25786-7A	Pocillopora grandis	Kaua‘i	2021-04-28	Bleaching	tentacle	epidermis	Gram Negative	bacilli	90.31	41	45.3971
25786-8A	Pocillopora grandis	Kaua‘i	2021-04-28	Apparently normal	tentacle	epidermis	Gram Negative	bacilli	190.63	8	4.19656
25786-8A	Pocillopora grandis	Kaua‘i	2021-04-28	Apparently normal	tentacle	epidermis	Gram Negative	bacilli	190.63	8	4.19656
25786-8A	Pocillopora grandis	Kaua‘i	2021-04-28	Apparently normal	tentacle	epidermis	Gram Negative	bacilli	190.63	8	4.19656
25786-8A	Pocillopora grandis	Kaua‘i	2021-04-28	Apparently normal	tentacle	epidermis	Gram Negative	bacilli	190.63	8	4.19656
25786-8A	Pocillopora grandis	Kaua‘i	2021-04-28	Apparently normal	tentacle	epidermis	Gram Negative	undetermined	190.63	8	4.19656
25786-8A	Pocillopora grandis	Kaua‘i	2021-04-28	Apparently normal	tentacle	epidermis	Gram Negative	bacilli	190.63	8	4.19656
25786-8A	Pocillopora grandis	Kaua‘i	2021-04-28	Apparently normal	tentacle	epidermis	Gram Negative	bacilli	190.63	8	4.19656
25786-8A	Pocillopora grandis	Kaua‘i	2021-04-28	Apparently normal	tentacle	epidermis	Gram Negative	bacilli	190.63	8	4.19656
25786-9A	Pocillopora grandis	Kaua‘i	2021-04-28	Tissue loss	tentacle	epidermis	Gram Negative	bacilli	327.95	14	4.2689
25786-9A	Pocillopora grandis	Kaua‘i	2021-04-28	Tissue loss	tentacle	mesoglea	Gram Negative	bacilli	327.95	14	4.2689
25786-9A	Pocillopora grandis	Kaua‘i	2021-04-28	Tissue loss	tentacle	mesoglea	Gram Negative	bacilli	327.95	14	4.2689
25786-9A	Pocillopora grandis	Kaua‘i	2021-04-28	Tissue loss	tentacle	mesoglea	Gram Negative	bacilli	327.95	14	4.2689
25786-9A	Pocillopora grandis	Kaua‘i	2021-04-28	Tissue loss	tentacle	epidermis	Gram Negative	bacilli	327.95	14	4.2689
25786-9A	Pocillopora grandis	Kaua‘i	2021-04-28	Tissue loss	tentacle	epidermis	Gram Negative	bacilli	327.95	14	4.2689
25786-9A	Pocillopora grandis	Kaua‘i	2021-04-28	Tissue loss	tentacle	mesoglea	Gram Negative	bacilli	327.95	14	4.2689
25786-9A	Pocillopora grandis	Kaua‘i	2021-04-28	Tissue loss	tentacle	mesoglea	Gram Negative	bacilli	327.95	14	4.2689
25786-9A	Pocillopora grandis	Kaua‘i	2021-04-28	Tissue loss	mesentery	epidermis	Gram Negative	bacilli	327.95	14	4.2689
25786-9A	Pocillopora grandis	Kaua‘i	2021-04-28	Tissue loss	tentacle	epidermis	Gram Negative	bacilli	327.95	14	4.2689
25786-9A	Pocillopora grandis	Kaua‘i	2021-04-28	Tissue loss	tentacle	epidermis	Gram Negative	bacilli	327.95	14	4.2689
25786-9A	Pocillopora grandis	Kaua‘i	2021-04-28	Tissue loss	tentacle	epidermis	Gram Negative	bacilli	327.95	14	4.2689
25786-9A	Pocillopora grandis	Kaua‘i	2021-04-28	Tissue loss	tentacle	epidermis	Gram Negative	bacilli	327.95	14	4.2689
25786-9A	Pocillopora grandis	Kaua‘i	2021-04-28	Tissue loss	tentacle	epidermis	Gram Negative	bacilli	327.95	14	4.2689
