# Supplementary material for: Gram staining reveals diverse bacterial associations in coral cell-associated microbial aggregates in the Pacific Ocean
Source: PeerJ. 2025 Aug 19;13:e19867. doi: 10.7717/peerj.19867 (PMC12372787; doi:10.7717/peerj.19867)
Supplement: Supplemental Information 2 — The data partitioned by case number, animal, location of collection, tissue area assessed, cell-associated microbial aggregates (CAMA) count, CAMA/cm2, coral colony ID and lesion status. Note some fragment listed in File S1 were excluded from File S2 because a complete tissue pair (normal and lesion) was not available. [file peerj-13-19867-s002.xlsx]

## Sheet: CountsByPaired
Case	Animal	Location	Lesion	colonyID	AreaMm2	CAMAcount	CAMAPerCm	Status
17800-104A	Coral: Porites lobata	O‘ahu	Bleaching	1	218.69	4	1.83	lesion
17800-105A	Coral: Porites lobata	O‘ahu	Apparently normal	1	92.56	6	6.48	Apparently normal
17800-127A	Coral: Porites lobata	O‘ahu	Discoloration	2	158.48	4	2.52	lesion
17800-128A	Coral: Porites lobata	O‘ahu	Apparently normal	2	135.08	48	35.53	Apparently normal
17800-88A	Coral: Porites lobata	O‘ahu	Tissue loss	3	163.66	3	1.83	lesion
17800-89A	Coral: Porites lobata	O‘ahu	Apparently normal	3	301.3	14	4.65	Apparently normal
17800-96A	Coral: Porites lobata	O‘ahu	Tissue loss	4	312.97	7	2.24	lesion
17800-97A	Coral: Porites lobata	O‘ahu	Apparently normal	4	195.71	27	13.8	Apparently normal
21506-5A	Coral: Porites compressa	Island of Hawai‘i	Tissue loss	5	239.16	32	13.38	lesion
21506-6A	Coral: Porites compressa	Island of Hawai‘i	Apparently normal	5	240.52	124	51.55	Apparently normal
21506-7A	Coral: Porites compressa	Island of Hawai‘i	Tissue loss	6	156.53	38	24.28	lesion
21506-8A	Coral: Porites compressa	Island of Hawai‘i	Apparently normal	6	220.14	202	91.76	Apparently normal
21602-11A	Coral: Acropora cytherea	Palmyra Atoll	Tissue loss	7	113.29	3	2.65	lesion
21602-10A	Coral: Acropora cytherea	Palmyra Atoll	Apparently normal	7	203.93	7	3.43	Apparently normal
21602-7A	Coral: Acropora cytherea	Palmyra Atoll	Tissue loss	8	196.34	15	7.64	lesion
21602-6A	Coral: Acropora cytherea	Palmyra Atoll	Apparently normal	8	95.36	6	6.29	Apparently normal
21612-8A	Coral: Porites compressa	O‘ahu	Bleaching	9	138.37	25	18.07	lesion
21612-7A	Coral: Porites compressa	O‘ahu	Apparently normal	9	231.75	43	18.55	Apparently normal
21956-01A	Coral: Porites evermanni	O‘ahu	Discoloration	10	252.71	10	3.96	lesion
21956-02A	Coral: Porites evermanni	O‘ahu	Apparently normal	10	60.15	4	6.65	Apparently normal
25680-15A	Coral: Pocillopora meandrina	Kaua‘i	Bleaching	11	307.2	8	2.6	lesion
25680-1A	Coral: Pocillopora meandrina	Kaua‘i	Apparently normal	11	216.5	4	1.85	Apparently normal
25680-16A	Coral: Pocillopora meandrina	Kaua‘i	Bleaching	12	176.16	2	1.14	lesion
25680-2A	Coral: Pocillopora meandrina	Kaua‘i	Apparently normal	12	279.72	44	15.73	Apparently normal
25680-17A	Coral: Pocillopora meandrina	Kaua‘i	Tissue loss	13	225.72	2	0.89	lesion
25680-3A	Coral: Pocillopora meandrina	Kaua‘i	Apparently normal	13	166.71	12	7.2	Apparently normal
25680-18A	Coral: Pocillopora meandrina	Kaua‘i	Tissue loss	14	186.22	16	8.59	lesion
25680-4A	Coral: Pocillopora meandrina	Kaua‘i	Apparently normal	14	202.18	31	15.33	Apparently normal
25680-21A	Coral: Pocillopora meandrina	Kaua‘i	Bleaching	15	66.14	34	51.41	lesion
25680-7A	Coral: Pocillopora meandrina	Kaua‘i	Apparently normal	15	170.12	43	25.28	Apparently normal
25680-23A	Coral: Pocillopora meandrina	Kaua‘i	Tissue loss	16	186.99	2	1.07	lesion
25680-9A	Coral: Pocillopora meandrina	Kaua‘i	Apparently normal	16	161.73	2	1.24	Apparently normal
25786-1A	Coral: Pocillopora grandis	Kaua‘i	Tissue loss	18	307.02	21	6.84	lesion
25786-2A	Coral: Pocillopora grandis	Kaua‘i	Apparently normal	18	247.29	58	23.45	Apparently normal
25786-3A	Coral: Pocillopora grandis	Kaua‘i	Tissue loss	19	102.94	29	28.17	lesion
25786-4A	Coral: Pocillopora grandis	Kaua‘i	Apparently normal	19	43.32	11	25.39	Apparently normal
25786-5A	Coral: Pocillopora grandis	Kaua‘i	Tissue loss	20	145.09	28	19.3	lesion
25786-6A	Coral: Pocillopora grandis	Kaua‘i	Apparently normal	20	175.06	12	6.85	Apparently normal
25786-8A	Coral: Pocillopora grandis	Kaua‘i	Apparently normal	21	190.63	8	4.2	Apparently normal
25786-7A	Coral: Pocillopora grandis	Kaua‘i	Bleaching	21	90.31	41	45.4	lesion
25786-9A	Coral: Pocillopora grandis	Kaua‘i	Tissue loss	22	327.95	14	4.27	lesion
25786-10A	Coral: Pocillopora grandis	Kaua‘i	Apparently normal	22	131.41	3	2.28	Apparently normal
17800-123A	Coral: Porites lobata	O‘ahu	Discoloration	23	280.58	11	3.92	lesion
17800-124A	Coral: Porites lobata	O‘ahu	Apparently normal	23	139.06	22	15.82	Apparently normal
17800-44A	Coral: Porites compressa	O‘ahu	Bleaching	24	185.34	20	10.79	lesion
17800-43A	Coral: Porites compressa	O‘ahu	Apparently normal	24	298.09	14	4.7	Apparently normal
17800-45B	Coral: Porites compressa	O‘ahu	Discoloration	25	106.5	8	7.51	lesion
17800-46B	Coral: Porites compressa	O‘ahu	Apparently normal	25	261.71	36	13.76	Apparently normal
17842-6A	Coral: Porites compressa	O‘ahu	Growth anomaly	26	183.07	6	3.28	lesion
17842-5A	Coral: Porites compressa	O‘ahu	Apparently normal	26	230.61	45	19.51	Apparently normal
17842-7A	Coral: Porites compressa	O‘ahu	Growth anomaly	27	163.27	6	3.67	lesion
17842-8A	Coral: Porites compressa	O‘ahu	Apparently normal	27	252.88	38	15.03	Apparently normal
21404-15A	Coral: Porites compressa	Island of Hawai‘i	Discoloration	28	120.36	26	21.6	lesion
21404-16A	Coral: Porites compressa	Island of Hawai‘i	Apparently normal	28	314.64	103	32.74	Apparently normal
21404-1A	Coral: Pocillopora meandrina	Island of Hawai‘i	Discoloration	29	149.6	22	14.71	lesion
21404-2A	Coral: Pocillopora meandrina	Island of Hawai‘i	Apparently normal	29	214.99	8	3.72	Apparently normal
21404-3A	Coral: Pocillopora meandrina	Island of Hawai‘i	Bleaching	30	88.98	9	10.11	lesion
21404-4A	Coral: Pocillopora meandrina	Island of Hawai‘i	Apparently normal	30	174.7	23	13.17	Apparently normal
21404-5A	Coral: Pocillopora meandrina	Island of Hawai‘i	Bleaching	31	82.6	12	14.53	lesion
21404-6A	Coral: Pocillopora meandrina	Island of Hawai‘i	Apparently normal	31	218.17	15	6.88	Apparently normal
21602-16A	Coral: Acropora cytherea	Palmyra Atoll	Apparently normal	32	153.65	4	2.6	Apparently normal
21602-17A	Coral: Acropora cytherea	Palmyra Atoll	Tissue loss	32	234.75	19	8.09	lesion
21612-1A	Coral: Porites compressa	O‘ahu	Apparently normal	33	203.66	3	1.47	Apparently normal
21612-2A	Coral: Porites compressa	O‘ahu	Tissue loss	33	232.26	0	0	lesion
25156-21A	Coral: Porites compressa	O‘ahu	Apparently normal	34	171.81	4	2.33	Apparently normal
25156-22A	Coral: Porites compressa	O‘ahu	Bleaching	34	227.08	10	4.4	lesion
25680-20A	Coral: Pocillopora meandrina	Kaua‘i	Tissue loss	35	236.46	15	6.34	lesion
25680-6A	Coral: Pocillopora meandrina	Kaua‘i	Apparently normal	35	153.01	5	3.27	Apparently normal
25680-5A	Coral: Pocillopora meandrina	Kaua‘i	Apparently normal	36	188.27	7	3.72	Apparently normal
25680-19A	Coral: Pocillopora meandrina	Kaua‘i	Tissue loss	36	92.5256	0	0	lesion
